# Supplementary material
Source: Research Square preprint supplement (doi:10.21203/rs.3.rs-9232122/v1)
Supplement: Supplementary file 1 [file 1abd2d000ae8270771b529d4.docx]

**Targeting Fibroblast Iron Uptake via SLC39A14 Prevents Pathological Tissue Remodeling in Inflammatory Arthritis**

**Supplementary Table S1 and S2**

**Table S1 Human primer sequences used for qRT–PCR.**

|  | Forward (5′-3′) | Reverse (5′-3′) |
| --- | --- | --- |
| *ALPL* | GCTGTAAGGACATCGCCTACCA | CCTGGCTTTCTCGTCACTCTCA |
| *COL1A1* | GATTCCCTGGACCTAAAGGTGC | AGCCTCTCCATCTTTGCCAGCA |
| *COL3A1*  *FN1* | TGGTCTGCAAGGAATGCCTGGA  ACAACACCGAGGTGACTGAGAC | TCTTTCCCTGGGACACCATCAG  GGACACAACGATGCTTCCTGAG |
| *GAPDH* | ATAAATTGAGCCCGCAGCC | CCCAATACGACCAAATCCGTTG |
| *ITGB3* | CATGGATTCCAGCAATGTCCTCC | TTGAGGCAGGTGGCATTGAAGG |
| *RUNX2*  *SLC39A14*  *TNC* | CCCAGTATGAGAGTAGGTGTCC  CTGGACCACATGATTCCTCAGC  ATGTCCTCCTGACAGCCGAGAA | GGGTAAGACTGGTCATAGGACC  AGAGTAGCGGACACCTTTCAGC  AGTCACGGTGAGGTTTTCCAGC |

**Table S2 Mouse primer sequences used for qRT–PCR.**

|  | Forward (5′-3′) | Reverse (5′-3′) |
| --- | --- | --- |
| *Col1a1* | CCTCAGGGTATTGCTGGACAAC | CAGAAGGACCTTGTTTGCCAGG |
| *Col3a1* | GACCAAAAGGTGATGCTGGACAG | CAAGACCTCGTGCTCCAGTTAG |
| *Fn1* | CCCTATCTCTGATACCGTTGTCC | TGCCGCAACTACTGTGATTCGG |
| *Gapdh*  *Itgb3* | CATCACTGCCACCCAGAAGACTG  GTGAGTGCGATGACTTCTCCTG | ATGCCAGTGAGCTTCCCGTTCAG  CAGGTGTCAGTGCGTGTAGTAC |
| *Slc39a14* | CTGGCTATTGGTGCCTCCTTCA | TGCCAGCATTGAGCAGGATGAC |
| *Tnc* | GAGACCTGACACGGAGTATGAG | CTCCAAGGTGATGCTGTTGTCTG |
