# Supplementary material
Source: Research Square preprint supplement (doi:10.21203/rs.3.rs-9232122/v1)
Supplement: Supplementary file 2 [file d0e3e07bf212d52d32b8627d.xlsx]

## Sheet: Table S1 cluster of scRNA
	p_val	gene	avg_logFC	pct.1	pct.2	p_val_adj	cluster
1	0.00e+00	PRG4	4.19598	0.694	0.197	0.00e+00	11
2	0.00e+00	APOD	3.24479	0.395	0.115	0.00e+00	11
3	0.00e+00	PLA2G2A	2.60534	0.592	0.151	0.00e+00	11
4	0.00e+00	CXCL12	2.59603	0.509	0.116	0.00e+00	11
5	0.00e+00	DCN	2.44347	0.921	0.229	0.00e+00	11
6	0.00e+00	CFD	2.43131	0.677	0.14	0.00e+00	11
7	0.00e+00	LYZ	-2.3559	0.369	0.61	0.00e+00	11
8	0.00e+00	IGFBP6	2.23552	0.623	0.12	0.00e+00	11
9	0.00e+00	THBS4	2.19719	0.659	0.098	0.00e+00	11
10	0.00e+00	COMP	2.1454	0.272	0.078	0.00e+00	11
11	0.00e+00	S100A8	-2.1284	0.455	0.659	0.00e+00	11
12	0.00e+00	SRGN	-2.11351	0.404	0.709	0.00e+00	11
13	0.00e+00	S100A9	-2.0824	0.381	0.629	0.00e+00	11
14	0.00e+00	CCN5	2.06005	0.394	0.042	0.00e+00	11
15	0.00e+00	CLU	2.03499	0.86	0.338	0.00e+00	11
16	0.00e+00	COLEC12	1.94628	0.585	0.096	0.00e+00	11
17	0.00e+00	HBEGF	1.94021	0.324	0.097	0.00e+00	11
18	0.00e+00	GPX3	1.91417	0.721	0.141	0.00e+00	11
19	0.00e+00	ABI3BP	1.8423	0.696	0.096	0.00e+00	11
20	0.00e+00	MNDA	-1.83781	0.104	0.494	0.00e+00	11
21	0.00e+00	EFEMP1	1.82758	0.624	0.083	0.00e+00	11
22	0.00e+00	BGLAP	1.81188	0.205	0.032	0.00e+00	11
23	0.00e+00	FBLN1	1.79958	0.728	0.124	0.00e+00	11
24	0.00e+00	WISP2	1.75841	0.285	0.018	0.00e+00	11
25	0.00e+00	RAC2	-1.74645	0.097	0.59	0.00e+00	11
26	0.00e+00	LCP1	-1.73162	0.176	0.632	0.00e+00	11
27	0.00e+00	ALOX5AP	-1.7213	0.099	0.467	0.00e+00	11
28	0.00e+00	MYOC	1.71526	0.247	0.003	0.00e+00	11
29	0.00e+00	LUM	1.71174	0.81	0.166	0.00e+00	11
30	0.00e+00	ERRFI1	1.70818	0.457	0.058	0.00e+00	11
31	0.00e+00	ARHGDIB	-1.70524	0.194	0.744	0.00e+00	11
32	0.00e+00	GSN	1.6992	0.917	0.555	0.00e+00	11
33	0.00e+00	MGP	1.69131	0.885	0.29	0.00e+00	11
34	0.00e+00	CFH	1.67608	0.752	0.161	0.00e+00	11
35	0.00e+00	CXCR4	-1.66276	0.159	0.481	0.00e+00	11
36	0.00e+00	CTGF	1.66	0.262	0.056	0.00e+00	11
37	0.00e+00	ITGBL1	1.64271	0.473	0.06	0.00e+00	11
38	0.00e+00	TYROBP	-1.64104	0.248	0.556	0.00e+00	11
39	0.00e+00	SCARA5	1.63421	0.52	0.041	0.00e+00	11
40	0.00e+00	TIMP3	1.61646	0.796	0.254	0.00e+00	11
41	0.00e+00	COL14A1	1.60459	0.527	0.105	0.00e+00	11
42	0.00e+00	SERPING1	1.59809	0.852	0.234	0.00e+00	11
43	0.00e+00	MFAP5	1.59649	0.341	0.072	0.00e+00	11
44	0.00e+00	HTRA1	1.58894	0.717	0.238	0.00e+00	11
45	0.00e+00	FYB1	-1.57651	0.083	0.498	0.00e+00	11
46	0.00e+00	EVI2B	-1.56114	0.066	0.469	0.00e+00	11
47	0.00e+00	CTSS	-1.56007	0.253	0.537	0.00e+00	11
48	0.00e+00	PTPRC	-1.55975	0.108	0.522	0.00e+00	11
49	0.00e+00	CCDC80	1.55579	0.779	0.191	0.00e+00	11
50	0.00e+00	CHAD	1.55106	0.215	0.026	0.00e+00	11
51	0.00e+00	IGLC2	-1.54622	0.345	0.109	0.00e+00	11
52	0.00e+00	MFAP4	1.54063	0.588	0.07	0.00e+00	11
53	0.00e+00	LEPR	1.53195	0.302	0.055	0.00e+00	11
54	0.00e+00	PTGDS	1.52255	0.424	0.069	0.00e+00	11
55	0.00e+00	C1S	1.50395	0.805	0.174	0.00e+00	11
56	0.00e+00	CLIC5	1.50329	0.23	0.013	0.00e+00	11
57	0.00e+00	PLTP	1.50247	0.623	0.179	0.00e+00	11
58	0.00e+00	PCOLCE2	1.50019	0.577	0.06	0.00e+00	11
59	0.00e+00	FN1	1.48554	0.823	0.317	0.00e+00	11
60	0.00e+00	FCER1G	-1.47831	0.22	0.495	0.00e+00	11
61	0.00e+00	LAPTM5	-1.47145	0.126	0.576	0.00e+00	11
62	0.00e+00	CRYAB	1.47112	0.517	0.086	0.00e+00	11
63	0.00e+00	SEMA3C	1.44456	0.509	0.071	0.00e+00	11
64	0.00e+00	SERPINF1	1.43887	0.816	0.202	0.00e+00	11
65	0.00e+00	IGFBP5	1.41927	0.699	0.176	0.00e+00	11
66	0.00e+00	C1R	1.41738	0.789	0.179	0.00e+00	11
67	0.00e+00	CYBRD1	1.41223	0.771	0.171	0.00e+00	11
68	0.00e+00	PCOLCE	1.41188	0.755	0.163	0.00e+00	11
69	0.00e+00	PLPP3	1.39062	0.634	0.183	0.00e+00	11
70	0.00e+00	C3	1.37197	0.285	0.049	0.00e+00	11
71	0.00e+00	CILP	1.3717	0.357	0.05	0.00e+00	11
72	0.00e+00	PLEK	-1.35527	0.063	0.411	0.00e+00	11
73	0.00e+00	CRTAC1	1.35113	0.373	0.095	0.00e+00	11
74	0.00e+00	FGR	-1.33638	0.076	0.428	0.00e+00	11
75	0.00e+00	FSTL1	1.32997	0.791	0.225	0.00e+00	11
76	0.00e+00	TNXB	1.32949	0.565	0.108	0.00e+00	11
77	0.00e+00	ASPN	1.3245	0.392	0.125	0.00e+00	11
78	0.00e+00	HCLS1	-1.31068	0.165	0.539	0.00e+00	11
79	0.00e+00	CCN2	1.30687	0.399	0.113	0.00e+00	11
80	0.00e+00	ADH1B	1.30505	0.14	0.009	0.00e+00	11
81	0.00e+00	ITGB2	-1.29512	0.095	0.464	0.00e+00	11
82	0.00e+00	SFRP1	1.27891	0.223	0.028	0.00e+00	11
83	0.00e+00	MMP2	1.2764	0.795	0.256	0.00e+00	11
84	0.00e+00	MXRA8	1.27546	0.699	0.119	0.00e+00	11
85	0.00e+00	ACKR3	1.27179	0.544	0.084	0.00e+00	11
86	0.00e+00	EMB	-1.26288	0.072	0.407	0.00e+00	11
87	0.00e+00	TIMP2	1.26281	0.872	0.484	0.00e+00	11
88	0.00e+00	ITGB8	1.2566	0.301	0.021	0.00e+00	11
89	0.00e+00	PDGFRA	1.25167	0.641	0.088	0.00e+00	11
90	0.00e+00	MEDAG	1.24945	0.526	0.065	0.00e+00	11
91	0.00e+00	SDC2	1.24925	0.628	0.143	0.00e+00	11
92	0.00e+00	PLAC9	1.24493	0.612	0.137	0.00e+00	11
93	0.00e+00	CORO1A	-1.23986	0.099	0.467	0.00e+00	11
94	0.00e+00	PFN1	-1.2383	0.779	0.933	0.00e+00	11
95	0.00e+00	FBLN2	1.22765	0.413	0.115	0.00e+00	11
96	0.00e+00	FHL1	1.22687	0.647	0.15	0.00e+00	11
97	0.00e+00	SFRP4	1.22401	0.327	0.086	0.00e+00	11
98	0.00e+00	COL1A2	1.22193	0.878	0.397	0.00e+00	11
99	0.00e+00	SELENOP	1.22009	0.799	0.186	0.00e+00	11
100	0.00e+00	LTBP4	1.21963	0.568	0.089	0.00e+00	11
101	0.00e+00	WAS	-1.20699	0.109	0.452	0.00e+00	11
102	0.00e+00	SPARCL1	1.19017	0.734	0.254	0.00e+00	11
103	0.00e+00	GMFG	-1.1788	0.086	0.489	0.00e+00	11
104	0.00e+00	TKT	-1.17587	0.274	0.566	0.00e+00	11
105	0.00e+00	ABCA8	1.17492	0.375	0.026	0.00e+00	11
106	0.00e+00	FBN1	1.16397	0.667	0.178	0.00e+00	11
107	0.00e+00	GPSM3	-1.15967	0.111	0.439	0.00e+00	11
108	0.00e+00	DPT	1.15833	0.429	0.096	0.00e+00	11
109	0.00e+00	LHFPL6	1.15777	0.717	0.152	0.00e+00	11
110	0.00e+00	RARRES1	1.15315	0.33	0.025	0.00e+00	11
111	0.00e+00	IGHG2	-1.15146	0.238	0.051	0.00e+00	11
112	0.00e+00	GPR1	1.1423	0.234	0.004	0.00e+00	11
113	0.00e+00	VASP	-1.14008	0.185	0.512	0.00e+00	11
114	0.00e+00	ARRB2	-1.12743	0.092	0.419	0.00e+00	11
115	0.00e+00	HLA-C	-1.11874	0.807	0.933	0.00e+00	11
116	0.00e+00	GAS1	1.11304	0.509	0.087	0.00e+00	11
117	0.00e+00	LRP1	1.09299	0.781	0.225	0.00e+00	11
118	0.00e+00	LGALS3BP	1.09146	0.54	0.127	0.00e+00	11
119	0.00e+00	LTBP2	1.08989	0.514	0.1	0.00e+00	11
120	0.00e+00	CFL1	-1.08818	0.819	0.95	0.00e+00	11
121	0.00e+00	APP	1.08797	0.763	0.388	0.00e+00	11
122	0.00e+00	ISLR	1.07879	0.681	0.152	0.00e+00	11
123	0.00e+00	HAS1	1.07663	0.3	0.036	0.00e+00	11
124	0.00e+00	DST	1.07304	0.69	0.187	0.00e+00	11
125	0.00e+00	CYP1B1	1.0647	0.484	0.13	0.00e+00	11
126	0.00e+00	S100A10	1.05838	0.784	0.455	0.00e+00	11
127	0.00e+00	COTL1	-1.05747	0.197	0.492	0.00e+00	11
128	0.00e+00	MT1X	1.04947	0.586	0.234	0.00e+00	11
129	0.00e+00	AEBP1	1.04351	0.462	0.123	0.00e+00	11
130	0.00e+00	NTN4	1.04338	0.352	0.058	0.00e+00	11
131	0.00e+00	SFRP2	1.04319	0.299	0.086	0.00e+00	11
132	0.00e+00	LIMA1	1.0294	0.657	0.179	0.00e+00	11
133	0.00e+00	CFI	1.02813	0.334	0.073	0.00e+00	11
134	0.00e+00	OGN	1.02186	0.462	0.105	0.00e+00	11
135	0.00e+00	ECM2	1.01904	0.52	0.087	0.00e+00	11
136	0.00e+00	NTRK2	1.01632	0.361	0.043	0.00e+00	11
137	0.00e+00	GPNMB	1.01491	0.625	0.133	0.00e+00	11
138	0.00e+00	PTN	1.01182	0.261	0.044	0.00e+00	11
139	0.00e+00	SSPN	1.01134	0.563	0.082	0.00e+00	11
140	0.00e+00	COL12A1	1.00959	0.551	0.115	0.00e+00	11
141	0.00e+00	HLA-B	-1.00456	0.795	0.944	0.00e+00	11
142	0.00e+00	PMP22	1.00099	0.718	0.229	0.00e+00	11
143	0.00e+00	CAP1	-0.999765	0.555	0.706	0.00e+00	11
144	0.00e+00	RASD1	0.997098	0.313	0.06	0.00e+00	11
145	0.00e+00	H3F3A	-0.993305	0.873	0.922	0.00e+00	11
146	0.00e+00	FGFR1	0.991615	0.646	0.144	0.00e+00	11
147	0.00e+00	HLA-E	-0.989457	0.765	0.865	0.00e+00	11
148	0.00e+00	TIMP1	0.989315	0.762	0.343	0.00e+00	11
149	0.00e+00	TPM3	-0.986391	0.61	0.799	0.00e+00	11
150	0.00e+00	PDGFRL	0.983718	0.513	0.081	0.00e+00	11
151	0.00e+00	CTSK	0.976187	0.662	0.152	0.00e+00	11
152	0.00e+00	CP	0.975877	0.253	0.026	0.00e+00	11
153	0.00e+00	CD9	0.975443	0.682	0.264	0.00e+00	11
154	0.00e+00	IGFBP4	0.970849	0.686	0.284	0.00e+00	11
155	0.00e+00	PRRX1	0.966116	0.7	0.151	0.00e+00	11
156	0.00e+00	PABPC1	-0.965957	0.753	0.871	0.00e+00	11
157	0.00e+00	EBF1	0.96212	0.569	0.137	0.00e+00	11
158	0.00e+00	ARPC2	-0.96155	0.686	0.835	0.00e+00	11
159	0.00e+00	OLFML3	0.959575	0.4	0.082	0.00e+00	11
160	0.00e+00	S100A13	0.959391	0.576	0.151	0.00e+00	11
161	0.00e+00	CST3	0.954042	0.9	0.527	0.00e+00	11
162	0.00e+00	LAPTM4A	0.950753	0.859	0.437	0.00e+00	11
163	0.00e+00	KLF4	0.948685	0.577	0.23	0.00e+00	11
164	0.00e+00	NUPR1	0.945965	0.512	0.087	0.00e+00	11
165	0.00e+00	EPB41L2	0.927781	0.645	0.151	0.00e+00	11
166	0.00e+00	MYH9	-0.925347	0.527	0.722	0.00e+00	11
167	0.00e+00	CD81	0.925215	0.871	0.392	0.00e+00	11
168	0.00e+00	EGFR	0.92106	0.464	0.047	0.00e+00	11
169	0.00e+00	MT1M	0.920161	0.443	0.108	0.00e+00	11
170	0.00e+00	IGF1	0.916273	0.286	0.075	0.00e+00	11
171	0.00e+00	ACTB	-0.915439	0.975	0.99	0.00e+00	11
172	0.00e+00	FNDC1	0.913583	0.247	0.054	0.00e+00	11
173	0.00e+00	MT1E	0.906906	0.61	0.173	0.00e+00	11
174	0.00e+00	PRELP	0.906552	0.586	0.156	0.00e+00	11
175	0.00e+00	DAB2	0.903755	0.615	0.199	0.00e+00	11
176	0.00e+00	PDK4	0.90295	0.473	0.129	0.00e+00	11
177	0.00e+00	SNED1	0.901766	0.423	0.091	0.00e+00	11
178	0.00e+00	TNC	0.893932	0.329	0.093	0.00e+00	11
179	0.00e+00	DDR2	0.893858	0.519	0.11	0.00e+00	11
180	0.00e+00	AKAP12	0.892608	0.381	0.055	0.00e+00	11
181	0.00e+00	VCAM1	0.892503	0.239	0.049	0.00e+00	11
182	0.00e+00	NFIX	0.88518	0.685	0.162	0.00e+00	11
183	0.00e+00	CPE	0.884001	0.345	0.08	0.00e+00	11
184	0.00e+00	TFPI	0.881484	0.537	0.126	0.00e+00	11
185	0.00e+00	ZBTB20	0.872283	0.577	0.186	0.00e+00	11
186	0.00e+00	NNMT	0.863612	0.586	0.208	0.00e+00	11
187	0.00e+00	CD99	0.855365	0.875	0.489	0.00e+00	11
188	0.00e+00	COL6A3	0.85495	0.735	0.208	0.00e+00	11
189	0.00e+00	COL6A2	0.852914	0.811	0.259	0.00e+00	11
190	0.00e+00	SEMA5A	0.851709	0.275	0.038	0.00e+00	11
191	0.00e+00	MT2A	0.84771	0.795	0.392	0.00e+00	11
192	0.00e+00	ANGPTL5	0.846326	0.265	0.029	0.00e+00	11
193	0.00e+00	CDO1	0.840617	0.376	0.062	0.00e+00	11
194	0.00e+00	MRC2	0.838391	0.556	0.101	0.00e+00	11
195	0.00e+00	SPARC	0.8346	0.801	0.392	0.00e+00	11
196	0.00e+00	GNAI2	-0.833926	0.647	0.769	0.00e+00	11
197	0.00e+00	TPPP3	0.833363	0.441	0.141	0.00e+00	11
198	0.00e+00	FXYD1	0.832623	0.519	0.074	0.00e+00	11
199	0.00e+00	LAMA2	0.832058	0.282	0.037	0.00e+00	11
200	0.00e+00	ANK2	0.829444	0.384	0.039	0.00e+00	11
201	0.00e+00	ANGPTL2	0.827627	0.537	0.133	0.00e+00	11
202	0.00e+00	PODN	0.823435	0.292	0.03	0.00e+00	11
203	0.00e+00	CREB5	0.822082	0.444	0.138	0.00e+00	11
204	0.00e+00	ITGAV	0.820995	0.488	0.129	0.00e+00	11
205	0.00e+00	RHOBTB3	0.81688	0.494	0.099	0.00e+00	11
206	0.00e+00	COL1A1	0.816688	0.813	0.432	0.00e+00	11
207	0.00e+00	NOVA1	0.816573	0.39	0.051	0.00e+00	11
208	0.00e+00	SOD3	0.816454	0.531	0.122	0.00e+00	11
209	0.00e+00	LAMA4	0.812532	0.549	0.153	0.00e+00	11
210	0.00e+00	OMD	0.809002	0.307	0.054	0.00e+00	11
211	0.00e+00	FILIP1L	0.808216	0.403	0.106	0.00e+00	11
212	0.00e+00	ASPH	0.803553	0.637	0.206	0.00e+00	11
213	0.00e+00	FMO2	0.798099	0.144	0.013	0.00e+00	11
214	0.00e+00	ADAMTS5	0.791307	0.315	0.049	0.00e+00	11
215	0.00e+00	CSF1	0.788982	0.402	0.078	0.00e+00	11
216	0.00e+00	HLA-A	-0.788323	0.843	0.951	0.00e+00	11
217	0.00e+00	PPIC	0.78326	0.535	0.158	0.00e+00	11
218	0.00e+00	NFIB	0.782798	0.621	0.178	0.00e+00	11
219	0.00e+00	CDON	0.781944	0.387	0.039	0.00e+00	11
220	0.00e+00	PLS3	0.780296	0.638	0.189	0.00e+00	11
221	0.00e+00	SRPX	0.77964	0.281	0.073	0.00e+00	11
222	0.00e+00	PAM	0.778134	0.581	0.173	0.00e+00	11
223	0.00e+00	ZNF385B	0.773697	0.274	0.002	0.00e+00	11
224	0.00e+00	CALD1	0.772468	0.815	0.23	0.00e+00	11
225	0.00e+00	NFIA	0.77058	0.579	0.192	0.00e+00	11
226	0.00e+00	ANGPTL1	0.76979	0.397	0.055	0.00e+00	11
227	0.00e+00	ECRG4	0.767884	0.293	0.028	0.00e+00	11
228	0.00e+00	PCDH18	0.764999	0.304	0.045	0.00e+00	11
229	0.00e+00	SEMA3E	0.764537	0.274	0.011	0.00e+00	11
230	0.00e+00	GAS6	0.763358	0.346	0.116	0.00e+00	11
231	0.00e+00	IFI6	0.763172	0.539	0.258	0.00e+00	11
232	0.00e+00	MEG3	0.758279	0.38	0.055	0.00e+00	11
233	0.00e+00	SMOC2	0.754109	0.366	0.06	0.00e+00	11
234	0.00e+00	CHRDL1	0.751931	0.192	0.02	0.00e+00	11
235	0.00e+00	SLIT2	0.744942	0.309	0.03	0.00e+00	11
236	0.00e+00	MGST1	0.742937	0.423	0.12	0.00e+00	11
237	0.00e+00	TGFBR3	0.739962	0.528	0.124	0.00e+00	11
238	0.00e+00	GOLIM4	0.73392	0.592	0.194	0.00e+00	11
239	0.00e+00	LRRN4CL	0.732757	0.415	0.022	0.00e+00	11
240	0.00e+00	XIST	0.728827	0.308	0.078	0.00e+00	11
241	0.00e+00	SMIM14	0.728226	0.584	0.233	0.00e+00	11
242	0.00e+00	VCAN	0.726621	0.6	0.278	0.00e+00	11
243	0.00e+00	ZFHX4	0.726259	0.362	0.046	0.00e+00	11
244	0.00e+00	FGF7	0.72264	0.287	0.054	0.00e+00	11
245	0.00e+00	USP53	0.722269	0.328	0.071	0.00e+00	11
246	0.00e+00	ITM2B	0.720119	0.924	0.754	0.00e+00	11
247	0.00e+00	CRISPLD1	0.719702	0.361	0.028	0.00e+00	11
248	0.00e+00	PDGFD	0.717421	0.377	0.032	0.00e+00	11
249	0.00e+00	AXL	0.716819	0.464	0.117	0.00e+00	11
250	0.00e+00	TMEM100	0.716263	0.301	0.024	0.00e+00	11
251	0.00e+00	ABCA6	0.716125	0.239	0.026	0.00e+00	11
252	0.00e+00	SGCE	0.713439	0.411	0.079	0.00e+00	11
253	0.00e+00	PROCR	0.711363	0.406	0.095	0.00e+00	11
254	0.00e+00	GFPT2	0.711268	0.408	0.078	0.00e+00	11
255	0.00e+00	EPHX1	0.710986	0.522	0.169	0.00e+00	11
256	0.00e+00	PCYOX1	0.708838	0.494	0.144	0.00e+00	11
257	0.00e+00	ITIH5	0.708237	0.323	0.04	0.00e+00	11
258	0.00e+00	IRX3	0.708237	0.334	0.037	0.00e+00	11
259	0.00e+00	SVEP1	0.707939	0.253	0.021	0.00e+00	11
260	0.00e+00	ANTXR1	0.707388	0.42	0.089	0.00e+00	11
261	0.00e+00	ARID5B	0.706311	0.536	0.187	0.00e+00	11
262	0.00e+00	CDH11	0.70562	0.411	0.095	0.00e+00	11
263	0.00e+00	METTL7A	0.703804	0.565	0.193	0.00e+00	11
264	0.00e+00	LINC00632	0.701939	0.379	0.089	0.00e+00	11
265	0.00e+00	RND3	0.700907	0.345	0.075	0.00e+00	11
266	0.00e+00	MFGE8	0.697661	0.465	0.161	0.00e+00	11
267	0.00e+00	LAMC1	0.697163	0.55	0.188	0.00e+00	11
268	0.00e+00	GPX4	0.69523	0.572	0.257	0.00e+00	11
269	0.00e+00	CYR61	0.693837	0.214	0.054	0.00e+00	11
270	0.00e+00	SELENOM	0.692201	0.516	0.146	0.00e+00	11
271	0.00e+00	BGN	0.691254	0.527	0.206	0.00e+00	11
272	0.00e+00	COL5A2	0.685996	0.625	0.193	0.00e+00	11
273	0.00e+00	B2M	-0.685172	0.976	0.988	0.00e+00	11
274	0.00e+00	GEM	0.682353	0.296	0.047	0.00e+00	11
275	0.00e+00	YWHAB	-0.674738	0.72	0.807	0.00e+00	11
276	0.00e+00	ATP5F1E	-0.674151	0.815	0.912	0.00e+00	11
277	0.00e+00	DEFB1	0.668519	0.228	0.019	0.00e+00	11
278	0.00e+00	MXRA7	0.665229	0.577	0.188	0.00e+00	11
279	0.00e+00	CPQ	0.66511	0.547	0.159	0.00e+00	11
280	0.00e+00	SASH1	0.662377	0.474	0.117	0.00e+00	11
281	0.00e+00	LTBP3	0.661509	0.526	0.14	0.00e+00	11
282	0.00e+00	EPB41L1	0.660757	0.299	0.053	0.00e+00	11
283	0.00e+00	DCLK1	0.657812	0.272	0.05	0.00e+00	11
284	0.00e+00	FOXC1	0.65707	0.394	0.109	0.00e+00	11
285	0.00e+00	SSC5D	0.655967	0.423	0.079	0.00e+00	11
286	0.00e+00	SCUBE1	0.65387	0.234	0.006	0.00e+00	11
287	0.00e+00	UAP1	0.65146	0.417	0.104	0.00e+00	11
288	0.00e+00	CLEC3B	0.650074	0.269	0.037	0.00e+00	11
289	0.00e+00	TMSB4X	-0.645795	0.955	0.973	0.00e+00	11
290	0.00e+00	NOV	0.644014	0.11	0.006	0.00e+00	11
291	0.00e+00	CDKN1C	0.642336	0.383	0.096	0.00e+00	11
292	0.00e+00	C2orf40	0.640012	0.131	0.018	0.00e+00	11
293	0.00e+00	EMP1	0.639077	0.718	0.268	0.00e+00	11
294	0.00e+00	PLXDC2	0.63625	0.591	0.246	0.00e+00	11
295	0.00e+00	VKORC1	0.631733	0.639	0.29	0.00e+00	11
296	0.00e+00	CD248	0.631191	0.387	0.084	0.00e+00	11
297	0.00e+00	CLMP	0.629447	0.41	0.067	0.00e+00	11
298	0.00e+00	DPYSL3	0.627818	0.558	0.167	0.00e+00	11
299	0.00e+00	FBLN5	0.623608	0.261	0.055	0.00e+00	11
300	0.00e+00	PDGFRB	0.620853	0.419	0.103	0.00e+00	11
301	0.00e+00	ZIC1	0.620036	0.294	0.052	0.00e+00	11
302	0.00e+00	RBMS3	0.619625	0.341	0.069	0.00e+00	11
303	0.00e+00	FGF10	0.617016	0.252	0.01	0.00e+00	11
304	0.00e+00	VIT	0.615026	0.304	0.01	0.00e+00	11
305	0.00e+00	CD63	0.614151	0.896	0.638	0.00e+00	11
306	0.00e+00	CTSF	0.613216	0.448	0.096	0.00e+00	11
307	0.00e+00	PROS1	0.612084	0.45	0.086	0.00e+00	11
308	0.00e+00	EMP2	0.610467	0.535	0.154	0.00e+00	11
309	0.00e+00	FAM114A1	0.605965	0.499	0.132	0.00e+00	11
310	0.00e+00	PLSCR4	0.605386	0.424	0.067	0.00e+00	11
311	0.00e+00	CADM3	0.604825	0.251	0.018	0.00e+00	11
312	0.00e+00	DIRC3	0.60414	0.167	0.002	0.00e+00	11
313	0.00e+00	FAP	0.598542	0.405	0.103	0.00e+00	11
314	0.00e+00	COPZ2	0.597852	0.459	0.11	0.00e+00	11
315	0.00e+00	GNG12	0.597589	0.512	0.15	0.00e+00	11
316	0.00e+00	BCAT1	0.593794	0.392	0.139	0.00e+00	11
317	0.00e+00	DLC1	0.592037	0.453	0.127	0.00e+00	11
318	0.00e+00	ITGB5	0.591575	0.504	0.126	0.00e+00	11
319	0.00e+00	GPX8	0.5878	0.498	0.121	0.00e+00	11
320	0.00e+00	FERMT2	0.585829	0.51	0.14	0.00e+00	11
321	0.00e+00	TSC22D1	0.580846	0.461	0.17	0.00e+00	11
322	0.00e+00	HSPB6	0.5807	0.279	0.078	0.00e+00	11
323	0.00e+00	CCN1	0.580158	0.305	0.094	0.00e+00	11
324	0.00e+00	VEGFB	0.57873	0.475	0.171	0.00e+00	11
325	0.00e+00	VIM	0.578687	0.988	0.894	0.00e+00	11
326	0.00e+00	IL6ST	0.578534	0.695	0.298	0.00e+00	11
327	0.00e+00	SOX5	0.577113	0.301	0.033	0.00e+00	11
328	0.00e+00	SH3D19	0.57314	0.379	0.073	0.00e+00	11
329	0.00e+00	PDE4DIP	0.57054	0.479	0.116	0.00e+00	11
330	0.00e+00	NGFR	0.567577	0.205	0.025	0.00e+00	11
331	0.00e+00	GPRC5A	0.567564	0.282	0.029	0.00e+00	11
332	0.00e+00	NBL1	0.564605	0.542	0.176	0.00e+00	11
333	0.00e+00	PPIB	0.564272	0.679	0.359	0.00e+00	11
334	0.00e+00	SLN	0.562067	0.105	0.003	0.00e+00	11
335	0.00e+00	RRBP1	0.55944	0.684	0.297	0.00e+00	11
336	0.00e+00	FIBIN	0.55858	0.251	0.039	0.00e+00	11
337	0.00e+00	SIX3	0.557838	0.218	0.003	0.00e+00	11
338	0.00e+00	ALDH1A3	0.557303	0.261	0.027	0.00e+00	11
339	0.00e+00	RNASE4	0.554237	0.395	0.071	0.00e+00	11
340	0.00e+00	DSTN	0.553265	0.767	0.356	0.00e+00	11
341	0.00e+00	ENAH	0.553087	0.442	0.137	0.00e+00	11
342	0.00e+00	CLIC4	0.550301	0.583	0.225	0.00e+00	11
343	0.00e+00	DDAH2	0.549662	0.507	0.185	0.00e+00	11
344	0.00e+00	RCN3	0.548338	0.546	0.159	0.00e+00	11
345	0.00e+00	BOC	0.546253	0.257	0.041	0.00e+00	11
346	0.00e+00	EID1	0.545373	0.781	0.431	0.00e+00	11
347	0.00e+00	SGCB	0.545137	0.418	0.088	0.00e+00	11
348	0.00e+00	EEA1	0.545126	0.506	0.185	0.00e+00	11
349	0.00e+00	LAMB2	0.542222	0.491	0.15	0.00e+00	11
350	0.00e+00	NUCKS1	0.541236	0.801	0.453	0.00e+00	11
351	0.00e+00	SCARA3	0.539135	0.395	0.081	0.00e+00	11
352	0.00e+00	AKR1C2	0.533209	0.242	0.051	0.00e+00	11
353	0.00e+00	NDN	0.532554	0.465	0.112	0.00e+00	11
354	0.00e+00	XYLT1	0.532225	0.255	0.064	0.00e+00	11
355	0.00e+00	LIFR	0.530641	0.292	0.054	0.00e+00	11
356	0.00e+00	LMNA	0.530629	0.723	0.326	0.00e+00	11
357	0.00e+00	ANGPT1	0.529909	0.174	0.03	0.00e+00	11
358	0.00e+00	SCARB2	0.529849	0.607	0.271	0.00e+00	11
359	0.00e+00	CYGB	0.528619	0.275	0.063	0.00e+00	11
360	0.00e+00	CTSO	0.526035	0.414	0.112	0.00e+00	11
361	0.00e+00	PEBP1	0.524779	0.734	0.379	0.00e+00	11
362	0.00e+00	F3	0.523631	0.194	0.045	0.00e+00	11
363	0.00e+00	AHNAK	0.521146	0.855	0.502	0.00e+00	11
364	0.00e+00	BEX3	0.520742	0.513	0.178	0.00e+00	11
365	0.00e+00	ANKH	0.519674	0.423	0.156	0.00e+00	11
366	0.00e+00	GJA1	0.517955	0.457	0.155	0.00e+00	11
367	0.00e+00	RETREG1	0.514978	0.397	0.091	0.00e+00	11
368	0.00e+00	CNN3	0.514515	0.555	0.236	0.00e+00	11
369	0.00e+00	GFRA1	0.514496	0.169	0.014	0.00e+00	11
370	0.00e+00	S1PR3	0.513928	0.236	0.051	0.00e+00	11
371	0.00e+00	SBDS	0.512948	0.602	0.276	0.00e+00	11
372	0.00e+00	OSR2	0.512684	0.276	0.034	0.00e+00	11
373	0.00e+00	PLPP1	0.511436	0.426	0.167	0.00e+00	11
374	0.00e+00	NDFIP1	0.509021	0.641	0.33	0.00e+00	11
375	0.00e+00	MAN1A1	0.505044	0.497	0.187	0.00e+00	11
376	0.00e+00	TNFAIP6	0.504277	0.33	0.107	0.00e+00	11
377	0.00e+00	ENPP1	0.500784	0.363	0.067	0.00e+00	11
378	0.00e+00	GABRA4	0.500229	0.184	0.002	0.00e+00	11
379	0.00e+00	ADIRF	0.499865	0.527	0.159	0.00e+00	11
380	0.00e+00	AR	0.499108	0.249	0.03	0.00e+00	11
381	0.00e+00	BICC1	0.497442	0.301	0.058	0.00e+00	11
382	0.00e+00	GINM1	0.497346	0.524	0.186	0.00e+00	11
383	0.00e+00	GHR	0.497028	0.23	0.018	0.00e+00	11
384	0.00e+00	TCEAL9	0.496676	0.496	0.176	0.00e+00	11
385	0.00e+00	PLEKHH2	0.495019	0.236	0.03	0.00e+00	11
386	0.00e+00	SOX9	0.494884	0.222	0.033	0.00e+00	11
387	0.00e+00	SPTBN1	0.493186	0.711	0.365	0.00e+00	11
388	0.00e+00	OLFML1	0.491922	0.302	0.037	0.00e+00	11
389	0.00e+00	FAM3C	0.491386	0.437	0.146	0.00e+00	11
390	0.00e+00	HOXC10	0.490549	0.313	0.019	0.00e+00	11
391	0.00e+00	UST	0.490004	0.268	0.015	0.00e+00	11
392	0.00e+00	MIR99AHG	0.489878	0.32	0.034	0.00e+00	11
393	0.00e+00	NENF	0.488079	0.446	0.157	0.00e+00	11
394	0.00e+00	MAP1A	0.487374	0.368	0.077	0.00e+00	11
395	0.00e+00	CKB	0.487202	0.226	0.037	0.00e+00	11
396	0.00e+00	KANK2	0.487108	0.424	0.13	0.00e+00	11
397	0.00e+00	GALNT10	0.485483	0.324	0.112	0.00e+00	11
398	0.00e+00	MXRA5	0.485167	0.358	0.124	0.00e+00	11
399	0.00e+00	NFIC	0.484779	0.716	0.354	0.00e+00	11
400	0.00e+00	SNAI2	0.482913	0.279	0.078	0.00e+00	11
401	0.00e+00	TMEM196	0.480457	0.212	0.003	0.00e+00	11
402	0.00e+00	CAVIN1	0.479949	0.742	0.286	0.00e+00	11
403	0.00e+00	HMCN1	0.479666	0.317	0.059	0.00e+00	11
404	0.00e+00	FRMD6	0.477831	0.297	0.076	0.00e+00	11
405	0.00e+00	XG	0.477126	0.269	0.031	0.00e+00	11
406	0.00e+00	DPYSL2	0.476436	0.66	0.322	0.00e+00	11
407	0.00e+00	RUNX1T1	0.475204	0.275	0.073	0.00e+00	11
408	0.00e+00	ANO5	0.47363	0.106	0.006	0.00e+00	11
409	0.00e+00	HAS2	0.472804	0.203	0.035	0.00e+00	11
410	0.00e+00	PXDC1	0.472643	0.42	0.131	0.00e+00	11
411	0.00e+00	THBS2	0.471654	0.309	0.084	0.00e+00	11
412	0.00e+00	COX7A1	0.470137	0.361	0.101	0.00e+00	11
413	0.00e+00	CAB39L	0.469037	0.236	0.033	0.00e+00	11
414	0.00e+00	PRNP	0.468391	0.483	0.199	0.00e+00	11
415	0.00e+00	CYB5R3	0.466516	0.677	0.355	0.00e+00	11
416	0.00e+00	IL1R1	0.466363	0.46	0.161	0.00e+00	11
417	0.00e+00	PLAGL1	0.465651	0.347	0.103	0.00e+00	11
418	0.00e+00	DLX4	0.465228	0.232	0.005	0.00e+00	11
419	0.00e+00	SMARCA1	0.464303	0.352	0.073	0.00e+00	11
420	0.00e+00	ANXA4	0.463429	0.532	0.221	0.00e+00	11
421	0.00e+00	CEP126	0.462228	0.271	0.035	0.00e+00	11
422	0.00e+00	MAP7D3	0.461797	0.369	0.105	0.00e+00	11
423	0.00e+00	ADAMTSL3	0.461734	0.237	0.008	0.00e+00	11
424	0.00e+00	TTC3	0.461397	0.625	0.3	0.00e+00	11
425	0.00e+00	UGDH	0.460659	0.411	0.117	0.00e+00	11
426	0.00e+00	TPM1	0.460091	0.502	0.208	0.00e+00	11
427	0.00e+00	LTBP1	0.45952	0.408	0.139	0.00e+00	11
428	0.00e+00	FKBP10	0.459423	0.482	0.147	0.00e+00	11
429	0.00e+00	MPZL1	0.459242	0.417	0.14	0.00e+00	11
430	0.00e+00	ITGB1	0.457767	0.793	0.447	0.00e+00	11
431	0.00e+00	PPM1L	0.4573	0.273	0.036	0.00e+00	11
432	0.00e+00	PLEKHA5	0.457128	0.302	0.056	0.00e+00	11
433	0.00e+00	TSPAN3	0.456712	0.49	0.189	0.00e+00	11
434	0.00e+00	EPHA3	0.455077	0.244	0.024	0.00e+00	11
435	0.00e+00	LPAR1	0.455073	0.354	0.061	0.00e+00	11
436	0.00e+00	VASN	0.453827	0.335	0.066	0.00e+00	11
437	0.00e+00	ARHGAP21	0.45335	0.404	0.131	0.00e+00	11
438	0.00e+00	TMEM263	0.453337	0.409	0.11	0.00e+00	11
439	0.00e+00	PSD3	0.453124	0.357	0.071	0.00e+00	11
440	0.00e+00	FZD8	0.451791	0.269	0.045	0.00e+00	11
441	0.00e+00	ZCCHC24	0.450138	0.382	0.13	0.00e+00	11
442	0.00e+00	TSHZ2	0.450136	0.422	0.145	0.00e+00	11
443	0.00e+00	EFEMP2	0.447193	0.376	0.087	0.00e+00	11
444	0.00e+00	PCDH9	0.44612	0.228	0.024	0.00e+00	11
445	0.00e+00	SNX9	0.445899	0.468	0.181	0.00e+00	11
446	0.00e+00	FMOD	0.445583	0.375	0.121	0.00e+00	11
447	0.00e+00	PCSK6	0.44433	0.225	0.007	0.00e+00	11
448	0.00e+00	COL6A1	0.443188	0.83	0.283	0.00e+00	11
449	0.00e+00	PDPN	0.442851	0.329	0.065	0.00e+00	11
450	0.00e+00	ARL1	0.442503	0.495	0.181	0.00e+00	11
451	0.00e+00	GLT8D2	0.441585	0.346	0.068	0.00e+00	11
452	0.00e+00	ABLIM1	0.441414	0.401	0.117	0.00e+00	11
453	0.00e+00	C12orf57	0.440808	0.627	0.289	0.00e+00	11
454	0.00e+00	VGLL3	0.440087	0.195	0.04	0.00e+00	11
455	0.00e+00	NAV1	0.440039	0.423	0.144	0.00e+00	11
456	0.00e+00	STEAP2	0.439478	0.278	0.04	0.00e+00	11
457	0.00e+00	PHLDB1	0.437577	0.365	0.096	0.00e+00	11
458	0.00e+00	ECM1	0.436756	0.395	0.13	0.00e+00	11
459	0.00e+00	BMP5	0.436086	0.113	0.014	0.00e+00	11
460	0.00e+00	MMP14	0.436076	0.364	0.129	0.00e+00	11
461	0.00e+00	ZNF503	0.434795	0.281	0.082	0.00e+00	11
462	0.00e+00	C1GALT1	0.433421	0.407	0.142	0.00e+00	11
463	0.00e+00	TIPARP	0.431503	0.351	0.111	0.00e+00	11
464	0.00e+00	TMEM98	0.431028	0.331	0.083	0.00e+00	11
465	0.00e+00	ADAM9	0.430991	0.406	0.145	0.00e+00	11
466	0.00e+00	CNTN4	0.430296	0.203	0.006	0.00e+00	11
467	0.00e+00	CMYA5	0.427433	0.179	0.011	0.00e+00	11
468	0.00e+00	NID2	0.427341	0.256	0.068	0.00e+00	11
469	0.00e+00	RECK	0.425443	0.269	0.042	0.00e+00	11
470	0.00e+00	DHRS3	0.425157	0.226	0.049	0.00e+00	11
471	0.00e+00	C1orf21	0.424087	0.306	0.092	0.00e+00	11
472	0.00e+00	AHI1	0.423398	0.323	0.084	0.00e+00	11
473	0.00e+00	RBFOX2	0.423265	0.449	0.139	0.00e+00	11
474	0.00e+00	CAV1	0.422488	0.658	0.268	0.00e+00	11
475	0.00e+00	C17orf58	0.42158	0.246	0.038	0.00e+00	11
476	0.00e+00	TCEAL4	0.420528	0.472	0.197	0.00e+00	11
477	0.00e+00	PTPN13	0.42019	0.265	0.029	0.00e+00	11
478	0.00e+00	UACA	0.420181	0.434	0.157	0.00e+00	11
479	0.00e+00	ANK3	0.419522	0.196	0.017	0.00e+00	11
480	0.00e+00	PTPRG	0.419085	0.35	0.076	0.00e+00	11
481	0.00e+00	PARVA	0.419035	0.412	0.124	0.00e+00	11
482	0.00e+00	ANTXR2	0.418185	0.451	0.145	0.00e+00	11
483	0.00e+00	PI16	0.417235	0.103	0.012	0.00e+00	11
484	0.00e+00	BDH2	0.416896	0.336	0.077	0.00e+00	11
485	0.00e+00	CRNDE	0.416694	0.334	0.068	0.00e+00	11
486	0.00e+00	MAP3K20	0.413617	0.435	0.169	0.00e+00	11
487	0.00e+00	PGRMC1	0.413542	0.455	0.169	0.00e+00	11
488	0.00e+00	MAGI2-AS3	0.412194	0.297	0.088	0.00e+00	11
489	0.00e+00	SLC2A12	0.411067	0.165	0.004	0.00e+00	11
490	0.00e+00	SERPINH1	0.409882	0.522	0.218	0.00e+00	11
491	0.00e+00	CMBL	0.409491	0.287	0.039	0.00e+00	11
492	0.00e+00	NFE2L1	0.408378	0.504	0.218	0.00e+00	11
493	0.00e+00	LMAN1	0.407234	0.569	0.246	0.00e+00	11
494	0.00e+00	KHDRBS3	0.40635	0.265	0.032	0.00e+00	11
495	0.00e+00	SULF1	0.405874	0.335	0.077	0.00e+00	11
496	0.00e+00	RRAS	0.40367	0.41	0.153	0.00e+00	11
497	0.00e+00	ANGPTL4	0.403632	0.206	0.048	0.00e+00	11
498	0.00e+00	ARHGAP20	0.402642	0.22	0.007	0.00e+00	11
499	0.00e+00	IFITM3	0.401776	0.856	0.474	0.00e+00	11
500	0.00e+00	ARHGAP5	0.400033	0.418	0.14	0.00e+00	11
501	0.00e+00	HOXA10	0.399009	0.259	0.028	0.00e+00	11
502	0.00e+00	FXYD6	0.39884	0.321	0.105	0.00e+00	11
503	0.00e+00	COL5A1	0.398762	0.506	0.195	0.00e+00	11
504	0.00e+00	CAMK2D	0.398631	0.404	0.139	0.00e+00	11
505	0.00e+00	SORBS2	0.396643	0.308	0.053	0.00e+00	11
506	0.00e+00	KLF9	0.39647	0.567	0.258	0.00e+00	11
507	0.00e+00	SCRG1	0.396181	0.164	0.027	0.00e+00	11
508	0.00e+00	LOX	0.395464	0.317	0.101	0.00e+00	11
509	0.00e+00	NCKAP1	0.39418	0.426	0.134	0.00e+00	11
510	0.00e+00	PLOD2	0.394139	0.442	0.12	0.00e+00	11
511	0.00e+00	TCF7L2	0.39302	0.4	0.141	0.00e+00	11
512	0.00e+00	PALLD	0.392667	0.408	0.137	0.00e+00	11
513	0.00e+00	HSPB8	0.391935	0.255	0.037	0.00e+00	11
514	0.00e+00	CPED1	0.390735	0.255	0.041	0.00e+00	11
515	0.00e+00	ZNF704	0.390035	0.257	0.04	0.00e+00	11
516	0.00e+00	CERCAM	0.387412	0.366	0.109	0.00e+00	11
517	0.00e+00	HTRA4	0.386423	0.112	0.005	0.00e+00	11
518	0.00e+00	RASSF8	0.386309	0.293	0.058	0.00e+00	11
519	0.00e+00	EFNA5	0.385882	0.245	0.018	0.00e+00	11
520	0.00e+00	SPSB1	0.385457	0.29	0.065	0.00e+00	11
521	0.00e+00	C14orf132	0.384765	0.292	0.057	0.00e+00	11
522	0.00e+00	NT5E	0.384329	0.337	0.096	0.00e+00	11
523	0.00e+00	GXYLT2	0.383928	0.213	0.052	0.00e+00	11
524	0.00e+00	AKR1C1	0.382564	0.224	0.041	0.00e+00	11
525	0.00e+00	PGRMC2	0.380646	0.434	0.15	0.00e+00	11
526	0.00e+00	YAP1	0.380008	0.352	0.099	0.00e+00	11
527	0.00e+00	FOXO1	0.37982	0.393	0.139	0.00e+00	11
528	0.00e+00	TSKU	0.377733	0.283	0.063	0.00e+00	11
529	0.00e+00	BHLHE41	0.377625	0.207	0.043	0.00e+00	11
530	0.00e+00	OPTN	0.377226	0.422	0.161	0.00e+00	11
531	0.00e+00	MYH10	0.376901	0.278	0.068	0.00e+00	11
532	0.00e+00	CAVIN3	0.376399	0.469	0.185	0.00e+00	11
533	0.00e+00	NEGR1	0.373681	0.158	0.018	0.00e+00	11
534	0.00e+00	TEAD1	0.373418	0.295	0.079	0.00e+00	11
535	0.00e+00	GSTM3	0.372951	0.294	0.06	0.00e+00	11
536	0.00e+00	SAV1	0.372242	0.343	0.118	0.00e+00	11
537	0.00e+00	CDC42BPA	0.371108	0.364	0.113	0.00e+00	11
538	0.00e+00	AIG1	0.370345	0.381	0.119	0.00e+00	11
539	0.00e+00	AGTR1	0.367825	0.196	0.015	0.00e+00	11
540	0.00e+00	SPAG9	0.366158	0.532	0.227	0.00e+00	11
541	0.00e+00	LIMCH1	0.365529	0.238	0.052	0.00e+00	11
542	0.00e+00	FAM180B	0.363239	0.146	0.01	0.00e+00	11
543	0.00e+00	RAB23	0.362661	0.287	0.063	0.00e+00	11
544	0.00e+00	TRPS1	0.362326	0.394	0.135	0.00e+00	11
545	0.00e+00	KIRREL1	0.362253	0.257	0.06	0.00e+00	11
546	0.00e+00	SETD7	0.36206	0.372	0.131	0.00e+00	11
547	0.00e+00	RARG	0.361927	0.369	0.098	0.00e+00	11
548	0.00e+00	SIX1	0.36094	0.238	0.05	0.00e+00	11
549	0.00e+00	ASAP2	0.358653	0.308	0.077	0.00e+00	11
550	0.00e+00	SLC39A14	0.355927	0.381	0.114	0.00e+00	11
551	0.00e+00	WNT11	0.353391	0.144	0.009	0.00e+00	11
552	0.00e+00	SOBP	0.353142	0.283	0.043	0.00e+00	11
553	0.00e+00	SLC16A4	0.351712	0.244	0.026	0.00e+00	11
554	0.00e+00	BAG2	0.35166	0.244	0.051	0.00e+00	11
555	0.00e+00	GULP1	0.351331	0.269	0.044	0.00e+00	11
556	0.00e+00	C11orf96	0.350413	0.423	0.157	0.00e+00	11
557	0.00e+00	RAB34	0.350106	0.328	0.106	0.00e+00	11
558	0.00e+00	SELENBP1	0.349641	0.305	0.071	0.00e+00	11
559	0.00e+00	SREBF1	0.349077	0.321	0.088	0.00e+00	11
560	0.00e+00	C1QTNF7	0.347651	0.187	0.007	0.00e+00	11
561	0.00e+00	PDLIM3	0.347133	0.197	0.047	0.00e+00	11
562	0.00e+00	DLX3	0.346742	0.184	0.005	0.00e+00	11
563	0.00e+00	PFN2	0.345236	0.282	0.066	0.00e+00	11
564	0.00e+00	ITGA11	0.344917	0.207	0.033	0.00e+00	11
565	0.00e+00	KIAA0408	0.344033	0.189	0.013	0.00e+00	11
566	0.00e+00	FKBP7	0.342535	0.323	0.09	0.00e+00	11
567	0.00e+00	FAXDC2	0.341463	0.261	0.037	0.00e+00	11
568	0.00e+00	TCF7L1	0.341147	0.228	0.051	0.00e+00	11
569	0.00e+00	GOLGA2	0.340923	0.47	0.181	0.00e+00	11
570	0.00e+00	FAT1	0.34036	0.239	0.063	0.00e+00	11
571	0.00e+00	SEPT10	0.340247	0.169	0.035	0.00e+00	11
572	0.00e+00	GPSM2	0.338463	0.302	0.074	0.00e+00	11
573	0.00e+00	ARHGAP28	0.338314	0.211	0.033	0.00e+00	11
574	0.00e+00	NDRG2	0.336539	0.283	0.072	0.00e+00	11
575	0.00e+00	NDNF	0.336284	0.212	0.008	0.00e+00	11
576	0.00e+00	TMEM237	0.330841	0.245	0.045	0.00e+00	11
577	0.00e+00	LARP6	0.330601	0.251	0.061	0.00e+00	11
578	0.00e+00	EPN2	0.330557	0.342	0.097	0.00e+00	11
579	0.00e+00	SMAD3	0.329334	0.316	0.08	0.00e+00	11
580	0.00e+00	C5orf15	0.329097	0.377	0.132	0.00e+00	11
581	0.00e+00	TCF4	0.328689	0.659	0.297	0.00e+00	11
582	0.00e+00	EML1	0.327883	0.292	0.061	0.00e+00	11
583	0.00e+00	CFB	0.327333	0.248	0.052	0.00e+00	11
584	0.00e+00	P4HA2	0.327022	0.32	0.093	0.00e+00	11
585	0.00e+00	RGMA	0.326309	0.219	0.029	0.00e+00	11
586	0.00e+00	LMO3	0.325609	0.134	0.002	0.00e+00	11
587	0.00e+00	DNM1	0.32456	0.276	0.072	0.00e+00	11
588	0.00e+00	SEMA6D	0.324473	0.187	0.015	0.00e+00	11
589	0.00e+00	TRAM2	0.324368	0.337	0.111	0.00e+00	11
590	0.00e+00	KREMEN1	0.323006	0.3	0.074	0.00e+00	11
591	0.00e+00	KITLG	0.322245	0.175	0.036	0.00e+00	11
592	0.00e+00	PTPRD	0.321797	0.213	0.038	0.00e+00	11
593	0.00e+00	MAMDC2	0.321047	0.225	0.034	0.00e+00	11
594	0.00e+00	BMP4	0.31876	0.202	0.025	0.00e+00	11
595	0.00e+00	PBX1	0.318709	0.294	0.092	0.00e+00	11
596	0.00e+00	AL078639.1	0.318373	0.142	0.014	0.00e+00	11
597	0.00e+00	TWSG1	0.317665	0.326	0.097	0.00e+00	11
598	0.00e+00	NOTCH2	0.314367	0.42	0.15	0.00e+00	11
599	0.00e+00	DSEL	0.313985	0.237	0.057	0.00e+00	11
600	0.00e+00	ROBO1	0.313785	0.256	0.048	0.00e+00	11
601	0.00e+00	ECHDC2	0.313771	0.234	0.059	0.00e+00	11
602	0.00e+00	IGSF8	0.313178	0.308	0.082	0.00e+00	11
603	0.00e+00	LRP6	0.313084	0.221	0.049	0.00e+00	11
604	0.00e+00	WASL	0.312567	0.342	0.115	0.00e+00	11
605	0.00e+00	ADCY3	0.312461	0.259	0.074	0.00e+00	11
606	0.00e+00	RSPO3	0.311271	0.139	0.008	0.00e+00	11
607	0.00e+00	EXT1	0.310951	0.307	0.087	0.00e+00	11
608	0.00e+00	MAN1C1	0.310243	0.235	0.043	0.00e+00	11
609	0.00e+00	FAM129A	0.309738	0.164	0.034	0.00e+00	11
610	0.00e+00	ALDH3A2	0.30933	0.337	0.114	0.00e+00	11
611	0.00e+00	SGCD	0.309281	0.248	0.049	0.00e+00	11
612	0.00e+00	SSBP2	0.306932	0.319	0.106	0.00e+00	11
613	0.00e+00	HIST1H1E	0.303608	0.147	0.028	0.00e+00	11
614	0.00e+00	RERG	0.3024	0.237	0.035	0.00e+00	11
615	0.00e+00	SPRY2	0.302294	0.2	0.05	0.00e+00	11
616	0.00e+00	SEMA3D	0.30208	0.143	0.006	0.00e+00	11
617	0.00e+00	SNX7	0.300903	0.288	0.071	0.00e+00	11
618	0.00e+00	PALM	0.300369	0.214	0.031	0.00e+00	11
619	0.00e+00	PLA2R1	0.300201	0.158	0.024	0.00e+00	11
620	0.00e+00	ST5	0.298783	0.224	0.047	0.00e+00	11
621	0.00e+00	PKD1	0.298712	0.295	0.081	0.00e+00	11
622	0.00e+00	AUTS2	0.298334	0.286	0.073	0.00e+00	11
623	0.00e+00	PPL	0.296429	0.112	0.013	0.00e+00	11
624	0.00e+00	ARMCX1	0.294322	0.273	0.065	0.00e+00	11
625	0.00e+00	IGSF10	0.294246	0.151	0.012	0.00e+00	11
626	0.00e+00	KIFAP3	0.293516	0.305	0.097	0.00e+00	11
627	0.00e+00	ZDBF2	0.293064	0.181	0.014	0.00e+00	11
628	0.00e+00	PKDCC	0.291938	0.196	0.032	0.00e+00	11
629	0.00e+00	PRUNE2	0.291044	0.208	0.039	0.00e+00	11
630	0.00e+00	SEMA3G	0.290522	0.137	0.012	0.00e+00	11
631	0.00e+00	TOB2	0.289628	0.358	0.126	0.00e+00	11
632	0.00e+00	MITF	0.289113	0.252	0.055	0.00e+00	11
633	0.00e+00	DOCK1	0.288903	0.274	0.078	0.00e+00	11
634	0.00e+00	DNM3OS	0.288641	0.209	0.048	0.00e+00	11
635	0.00e+00	GOPC	0.287626	0.366	0.13	0.00e+00	11
636	0.00e+00	GPC6	0.286778	0.21	0.04	0.00e+00	11
637	0.00e+00	DYNC2H1	0.286614	0.221	0.042	0.00e+00	11
638	0.00e+00	ARHGAP12	0.285944	0.277	0.07	0.00e+00	11
639	0.00e+00	MORC4	0.285248	0.218	0.036	0.00e+00	11
640	0.00e+00	ABI2	0.283109	0.287	0.089	0.00e+00	11
641	0.00e+00	EMILIN1	0.282436	0.211	0.05	0.00e+00	11
642	0.00e+00	FZD7	0.281821	0.198	0.04	0.00e+00	11
643	0.00e+00	TGFB2	0.280625	0.166	0.015	0.00e+00	11
644	0.00e+00	GSTA4	0.280103	0.264	0.074	0.00e+00	11
645	0.00e+00	SLC19A2	0.279782	0.184	0.03	0.00e+00	11
646	0.00e+00	PDE1A	0.277398	0.195	0.021	0.00e+00	11
647	0.00e+00	THRA	0.276335	0.337	0.112	0.00e+00	11
648	0.00e+00	LRRC2	0.276315	0.173	0.009	0.00e+00	11
649	0.00e+00	SDC3	0.276301	0.238	0.064	0.00e+00	11
650	0.00e+00	SHOX2	0.274793	0.188	0.023	0.00e+00	11
651	0.00e+00	AOX1	0.274269	0.13	0.008	0.00e+00	11
652	0.00e+00	LINC01140	0.27421	0.144	0.012	0.00e+00	11
653	0.00e+00	PREPL	0.273635	0.309	0.092	0.00e+00	11
654	0.00e+00	MAPK10	0.273588	0.185	0.007	0.00e+00	11
655	0.00e+00	FAM180A	0.273474	0.248	0.046	0.00e+00	11
656	0.00e+00	HSPB2	0.273388	0.194	0.04	0.00e+00	11
657	0.00e+00	ARL4D	0.273142	0.217	0.047	0.00e+00	11
658	0.00e+00	PDZRN4	0.273009	0.103	0.006	0.00e+00	11
659	0.00e+00	TBX15	0.272119	0.219	0.035	0.00e+00	11
660	0.00e+00	TRIM2	0.27048	0.183	0.03	0.00e+00	11
661	0.00e+00	IL11RA	0.269301	0.25	0.058	0.00e+00	11
662	0.00e+00	TIMP4	0.269094	0.148	0.028	0.00e+00	11
663	0.00e+00	TPST1	0.268959	0.261	0.073	0.00e+00	11
664	0.00e+00	PIEZO2	0.268421	0.131	0.023	0.00e+00	11
665	0.00e+00	C2	0.268377	0.25	0.067	0.00e+00	11
666	0.00e+00	TCTN1	0.26624	0.241	0.049	0.00e+00	11
667	0.00e+00	VEGFC	0.266073	0.177	0.029	0.00e+00	11
668	0.00e+00	ABCA1	0.265976	0.304	0.09	0.00e+00	11
669	0.00e+00	DCBLD2	0.265741	0.241	0.054	0.00e+00	11
670	0.00e+00	TRHDE	0.265609	0.147	0.001	0.00e+00	11
671	0.00e+00	LGR4	0.265075	0.214	0.041	0.00e+00	11
672	0.00e+00	TLN2	0.263229	0.2	0.037	0.00e+00	11
673	0.00e+00	TMEM45A	0.261911	0.305	0.092	0.00e+00	11
674	0.00e+00	ADGRD1	0.260511	0.15	0.007	0.00e+00	11
675	0.00e+00	ADGRG2	0.26037	0.171	0.016	0.00e+00	11
676	0.00e+00	COL3A1	0.260212	0.792	0.361	0.00e+00	11
677	0.00e+00	ISM1	0.259664	0.139	0.012	0.00e+00	11
678	0.00e+00	LRP1B	0.259626	0.151	0.002	0.00e+00	11
679	0.00e+00	ANG	0.257456	0.162	0.033	0.00e+00	11
680	0.00e+00	MEIS2	0.25734	0.178	0.038	0.00e+00	11
681	0.00e+00	EFS	0.256641	0.204	0.038	0.00e+00	11
682	0.00e+00	SDC4	0.253943	0.239	0.06	0.00e+00	11
683	0.00e+00	HRH1	0.253497	0.218	0.051	0.00e+00	11
684	0.00e+00	BMPER	0.25155	0.129	0.003	0.00e+00	11
685	0.00e+00	C1GALT1C1	0.251461	0.281	0.087	0.00e+00	11
686	0.00e+00	GLI3	0.250659	0.201	0.049	0.00e+00	11
687	4.62e-308	EPS8	0.348852	0.379	0.139	1.67e-303	11
688	6.54e-308	ADAMTS2	0.296311	0.341	0.114	2.37e-303	11
689	4.17e-306	MYO6	0.28875	0.271	0.082	1.51e-301	11
690	6.05e-306	PDIA3	0.50872	0.717	0.417	2.19e-301	11
691	3.70e-305	CD37	-1.07683	0.084	0.401	1.34e-300	11
692	5.20e-305	UFSP2	0.253524	0.279	0.086	1.88e-300	11
693	1.17e-304	SEPT7	0.603665	0.319	0.111	4.23e-300	11
694	1.44e-303	PID1	0.291271	0.203	0.051	5.20e-299	11
695	1.48e-303	STEAP4	0.881059	0.386	0.152	5.34e-299	11
696	3.62e-303	NORAD	0.478419	0.699	0.397	1.31e-298	11
697	1.18e-302	ERC1	0.327967	0.326	0.112	4.26e-298	11
698	2.90e-302	PTPRA	0.379519	0.524	0.235	1.05e-297	11
699	3.94e-302	RUFY3	0.309801	0.292	0.094	1.43e-297	11
700	8.54e-301	C1QTNF1	0.443961	0.339	0.119	3.09e-296	11
701	1.44e-300	PKD2	0.31315	0.36	0.13	5.22e-296	11
702	5.61e-300	GAPDH	-0.598094	0.823	0.849	2.03e-295	11
703	5.40e-299	MAP4	0.434463	0.539	0.244	1.95e-294	11
704	6.30e-299	SESTD1	0.363782	0.307	0.104	2.28e-294	11
705	1.08e-298	PTPN14	0.296396	0.328	0.111	3.90e-294	11
706	1.84e-297	MYO9A	0.308127	0.333	0.116	6.65e-293	11
707	1.62e-296	SLC39A6	0.279519	0.312	0.105	5.87e-292	11
708	6.31e-296	AK1	0.338724	0.335	0.118	2.28e-291	11
709	3.20e-295	RHOG	-1.03655	0.259	0.524	1.16e-290	11
710	4.99e-295	SELENOS	0.415391	0.51	0.23	1.81e-290	11
711	2.40e-294	C7	0.788717	0.134	0.026	8.68e-290	11
712	2.51e-294	SEPT2	0.520911	0.257	0.081	9.09e-290	11
713	3.25e-294	OLFML2B	0.46965	0.293	0.095	1.18e-289	11
714	3.33e-294	KDSR	0.346142	0.461	0.193	1.21e-289	11
715	4.34e-294	FGF18	0.28786	0.123	0.022	1.57e-289	11
716	1.40e-293	FAM49A	0.357236	0.329	0.116	5.06e-289	11
717	1.88e-293	HCG11	0.27913	0.217	0.059	6.81e-289	11
718	2.91e-293	VGLL4	0.323425	0.407	0.159	1.05e-288	11
719	4.13e-293	TMEM176A	0.481612	0.297	0.099	1.49e-288	11
720	6.60e-293	ALDH6A1	0.29111	0.257	0.078	2.39e-288	11
721	6.75e-293	CADM1	0.427644	0.176	0.042	2.44e-288	11
722	1.23e-292	IGHG3	-1.15641	0.313	0.103	4.44e-288	11
723	1.08e-291	TXNDC15	0.337282	0.435	0.177	3.92e-287	11
724	3.33e-291	IGHG4	-0.775649	0.319	0.105	1.20e-286	11
725	3.33e-291	ERLEC1	0.322953	0.446	0.183	1.21e-286	11
726	6.36e-291	ANXA2	0.329795	0.865	0.487	2.30e-286	11
727	1.47e-290	TMEM59	0.446546	0.736	0.432	5.32e-286	11
728	1.45e-289	DPP4	0.44203	0.182	0.045	5.24e-285	11
729	2.95e-289	CD53	-1.03298	0.07	0.374	1.07e-284	11
730	3.82e-289	SPI1	-1.25345	0.172	0.455	1.38e-284	11
731	3.84e-289	MESD	0.376336	0.482	0.213	1.39e-284	11
732	5.43e-289	GOLM1	0.466511	0.397	0.159	1.96e-284	11
733	8.52e-289	KDELR3	0.254837	0.284	0.09	3.08e-284	11
734	1.35e-288	FKBP9	0.35132	0.454	0.186	4.90e-284	11
735	3.01e-286	CLSTN1	0.285723	0.392	0.151	1.09e-281	11
736	4.39e-286	TSPAN7	0.471699	0.235	0.068	1.59e-281	11
737	1.39e-285	USP11	0.262837	0.338	0.121	5.03e-281	11
738	3.21e-285	CHST2	0.308069	0.239	0.071	1.16e-280	11
739	1.15e-284	GCA	-1.42036	0.151	0.441	4.15e-280	11
740	4.34e-284	SEPT11	0.338721	0.179	0.044	1.57e-279	11
741	7.78e-284	HCST	-1.0472	0.047	0.35	2.81e-279	11
742	5.97e-283	MYO1F	-1.05814	0.055	0.361	2.16e-278	11
743	1.84e-282	ZC2HC1A	0.294373	0.233	0.068	6.67e-278	11
744	1.27e-281	CASC4	0.32449	0.454	0.192	4.58e-277	11
745	1.70e-281	ACTR2	-0.831903	0.575	0.708	6.15e-277	11
746	5.86e-281	PDLIM5	0.543427	0.505	0.242	2.12e-276	11
747	7.94e-281	KCNE4	0.4576	0.17	0.041	2.87e-276	11
748	9.37e-281	KCNMA1	0.335656	0.236	0.069	3.39e-276	11
749	1.92e-280	MMP3	1.48972	0.159	0.036	6.95e-276	11
750	1.95e-279	LGALS1	0.485917	0.827	0.474	7.05e-275	11
751	1.47e-278	PTGFR	0.467621	0.193	0.051	5.32e-274	11
752	1.83e-278	IGHG1	-1.50195	0.336	0.116	6.61e-274	11
753	4.43e-278	PRSS23	0.400097	0.493	0.214	1.60e-273	11
754	1.90e-277	TNKS1BP1	0.323942	0.32	0.113	6.89e-273	11
755	4.64e-277	OAF	0.454287	0.441	0.187	1.68e-272	11
756	1.03e-276	CTTN	0.322786	0.426	0.171	3.71e-272	11
757	2.71e-276	RCN2	0.293709	0.338	0.124	9.80e-272	11
758	4.70e-276	CALU	0.320162	0.621	0.301	1.70e-271	11
759	6.15e-276	CMKLR1	0.270554	0.242	0.072	2.23e-271	11
760	2.24e-275	SPON2	0.275573	0.352	0.127	8.11e-271	11
761	7.98e-275	REXO2	0.392842	0.435	0.184	2.89e-270	11
762	2.56e-274	LGALS3	0.534102	0.79	0.505	9.26e-270	11
763	1.07e-273	SULF2	0.303885	0.396	0.157	3.86e-269	11
764	3.92e-273	ENPP2	0.315553	0.196	0.052	1.42e-268	11
765	6.53e-273	OAZ1	-0.710073	0.808	0.836	2.36e-268	11
766	8.60e-273	TMEM106B	0.287364	0.402	0.161	3.11e-268	11
767	1.01e-272	SPRED1	0.263404	0.282	0.093	3.64e-268	11
768	2.72e-271	MAGED2	0.326652	0.498	0.217	9.84e-267	11
769	2.06e-269	MYC	0.317463	0.347	0.13	7.47e-265	11
770	1.30e-268	AHNAK2	0.350536	0.231	0.07	4.69e-264	11
771	2.82e-268	SEC31A	0.424674	0.673	0.369	1.02e-263	11
772	3.10e-268	KDELR2	0.382322	0.588	0.291	1.12e-263	11
773	3.82e-268	PER3	0.275259	0.156	0.036	1.38e-263	11
774	6.85e-268	YBX3	0.385462	0.659	0.347	2.48e-263	11
775	2.85e-266	PTGIS	0.438371	0.199	0.055	1.03e-261	11
776	8.76e-266	BACE1	0.259715	0.255	0.081	3.17e-261	11
777	2.44e-265	ZYX	-0.937435	0.337	0.558	8.85e-261	11
778	2.94e-265	CYBB	-1.54363	0.142	0.415	1.06e-260	11
779	6.79e-265	CNN2	-1.00392	0.353	0.59	2.46e-260	11
780	1.75e-264	C1QTNF3	0.380918	0.185	0.048	6.32e-260	11
781	2.06e-264	CSF3R	-1.47785	0.138	0.418	7.47e-260	11
782	2.81e-264	FLRT2	0.330058	0.24	0.074	1.02e-259	11
783	3.40e-264	PRDX4	0.345945	0.468	0.205	1.23e-259	11
784	1.16e-263	ACTN1	-0.842271	0.248	0.524	4.18e-259	11
785	2.40e-263	MT1A	0.411957	0.177	0.045	8.70e-259	11
786	3.55e-262	SPATS2L	0.373293	0.413	0.174	1.28e-257	11
787	2.37e-261	TPT1	-0.392046	0.982	0.986	8.56e-257	11
788	4.93e-261	FCN1	-1.46862	0.105	0.386	1.79e-256	11
789	1.05e-259	GLG1	0.374482	0.592	0.299	3.81e-255	11
790	4.59e-259	ARHGAP9	-1.0145	0.058	0.344	1.66e-254	11
791	1.02e-258	DYNLL1	0.501706	0.708	0.41	3.70e-254	11
792	1.11e-258	ATRAID	0.365093	0.539	0.261	4.01e-254	11
793	1.56e-257	MYO1B	0.319321	0.32	0.117	5.66e-253	11
794	2.41e-257	SLC39A7	0.307352	0.431	0.184	8.73e-253	11
795	6.85e-257	SRGAP1	0.278028	0.201	0.056	2.48e-252	11
796	2.00e-256	ARL6IP5	0.456542	0.76	0.502	7.22e-252	11
797	2.09e-256	CRABP2	0.319887	0.306	0.108	7.55e-252	11
798	8.59e-256	CEBPD	0.673496	0.731	0.461	3.11e-251	11
799	2.04e-255	CFAP97	0.32952	0.411	0.173	7.37e-251	11
800	4.46e-255	TMED4	0.28727	0.474	0.214	1.62e-250	11
801	1.27e-254	ITM2A	0.413945	0.461	0.202	4.60e-250	11
802	2.54e-254	OSMR	0.292695	0.276	0.094	9.20e-250	11
803	3.65e-254	PGM3	0.292248	0.283	0.099	1.32e-249	11
804	4.36e-254	HES1	0.370289	0.278	0.094	1.58e-249	11
805	7.45e-254	SH3BGRL3	-0.578864	0.751	0.848	2.70e-249	11
806	1.55e-253	SESN3	0.336735	0.344	0.132	5.59e-249	11
807	2.40e-252	ADH5	0.351006	0.447	0.198	8.69e-248	11
808	2.28e-251	NCF2	-1.07179	0.051	0.329	8.24e-247	11
809	6.26e-251	HSPB1	0.435047	0.773	0.461	2.27e-246	11
810	1.13e-250	RFLNB	-1.11237	0.123	0.404	4.09e-246	11
811	2.20e-250	CAMSAP2	0.251364	0.287	0.1	7.97e-246	11
812	1.22e-249	PPIL4	0.25371	0.332	0.126	4.40e-245	11
813	6.33e-246	PPFIBP1	0.341297	0.342	0.132	2.29e-241	11
814	4.27e-245	TENT5A	0.365221	0.466	0.213	1.54e-240	11
815	2.25e-244	ATP6V0C	-0.857823	0.411	0.594	8.14e-240	11
816	6.56e-244	ITGAM	-1.00697	0.049	0.324	2.37e-239	11
817	9.32e-243	MBNL2	0.31668	0.371	0.152	3.37e-238	11
818	2.87e-242	SQSTM1	0.451827	0.648	0.369	1.04e-237	11
819	3.21e-241	PIK3R1	0.559355	0.526	0.269	1.16e-236	11
820	2.14e-240	IGLC1	-0.737044	0.227	0.068	7.76e-236	11
821	4.30e-240	SELL	-1.63823	0.161	0.411	1.56e-235	11
822	7.84e-240	MAGED1	0.35473	0.397	0.169	2.84e-235	11
823	2.80e-238	ID3	0.572302	0.479	0.228	1.01e-233	11
824	4.41e-237	MBTPS1	0.252964	0.394	0.165	1.60e-232	11
825	7.83e-237	SPOCK1	0.265444	0.181	0.05	2.84e-232	11
826	7.98e-237	EPDR1	0.309762	0.216	0.067	2.89e-232	11
827	8.07e-237	SLA	-0.983874	0.052	0.316	2.92e-232	11
828	1.43e-236	SMOC1	0.36118	0.126	0.027	5.19e-232	11
829	1.74e-236	TUBB2A	0.400951	0.369	0.154	6.31e-232	11
830	1.89e-236	RAB27A	-0.99947	0.145	0.407	6.85e-232	11
831	2.90e-235	CREB3L2	0.267676	0.375	0.155	1.05e-230	11
832	4.92e-235	NCF1	-1.14771	0.083	0.353	1.78e-230	11
833	5.00e-235	DTWD1	0.264931	0.241	0.079	1.81e-230	11
834	9.77e-235	TMEM176B	0.352168	0.311	0.116	3.53e-230	11
835	1.04e-234	PPP1R18	-0.873558	0.257	0.494	3.77e-230	11
836	5.72e-234	ARHGEF12	0.253015	0.377	0.155	2.07e-229	11
837	6.12e-234	METRNL	0.296481	0.429	0.188	2.21e-229	11
838	9.37e-234	TRIP10	0.324537	0.308	0.116	3.39e-229	11
839	4.28e-233	LEPROT	0.42156	0.658	0.365	1.55e-228	11
840	1.72e-230	MAP1B	0.509552	0.361	0.154	6.21e-226	11
841	2.01e-228	PADI4	-1.32432	0.051	0.315	7.26e-224	11
842	3.42e-228	ZEB1	0.285262	0.372	0.153	1.24e-223	11
843	4.65e-228	IFI27L2	0.353569	0.368	0.156	1.68e-223	11
844	2.71e-227	ARHGAP30	-0.827984	0.029	0.286	9.81e-223	11
845	1.17e-226	REEP3	0.285853	0.366	0.153	4.22e-222	11
846	1.22e-226	ATN1	0.34803	0.462	0.215	4.43e-222	11
847	7.62e-226	MEOX2	0.33423	0.209	0.066	2.76e-221	11
848	1.96e-225	FILIP1	0.252101	0.195	0.057	7.08e-221	11
849	2.75e-225	HSP90AA1	-1.03034	0.892	0.9	9.97e-221	11
850	3.27e-224	LST1	-0.937977	0.059	0.318	1.18e-219	11
851	1.09e-223	ADI1	0.371111	0.435	0.202	3.96e-219	11
852	2.31e-223	ARMCX3	0.278376	0.379	0.162	8.38e-219	11
853	1.23e-222	ACTR3	-0.765234	0.536	0.657	4.45e-218	11
854	2.40e-222	TSPAN4	0.383333	0.319	0.129	8.69e-218	11
855	3.18e-222	FPR1	-1.39743	0.075	0.328	1.15e-217	11
856	3.01e-221	IGFBP3	0.713296	0.18	0.053	1.09e-216	11
857	3.69e-221	RNF19A	0.273779	0.365	0.152	1.34e-216	11
858	4.89e-221	NCF4	-0.91945	0.05	0.308	1.77e-216	11
859	9.36e-221	NR4A1	0.694219	0.438	0.214	3.39e-216	11
860	3.92e-220	TRAM1	0.402473	0.679	0.392	1.42e-215	11
861	2.13e-219	UBXN2A	0.25515	0.241	0.083	7.72e-215	11
862	9.04e-219	DAZAP2	-0.762791	0.501	0.64	3.27e-214	11
863	3.69e-218	CDKN1A	0.365632	0.445	0.209	1.34e-213	11
864	1.04e-216	FTX	0.326259	0.279	0.104	3.77e-212	11
865	2.37e-216	PECAM1	-1.09379	0.094	0.356	8.58e-212	11
866	5.97e-216	ENDOD1	0.250306	0.253	0.089	2.16e-211	11
867	5.01e-215	SH3PXD2A	0.307797	0.298	0.116	1.81e-210	11
868	5.23e-215	HTRA3	0.327732	0.273	0.099	1.89e-210	11
869	5.59e-215	CAMK2N1	0.399507	0.216	0.072	2.02e-210	11
870	1.15e-214	CSTA	-0.891873	0.049	0.297	4.17e-210	11
871	3.83e-214	HSP90B1	0.342812	0.793	0.524	1.39e-209	11
872	9.20e-214	AMOTL2	0.291443	0.201	0.063	3.33e-209	11
873	9.65e-214	DDX24	0.317088	0.591	0.318	3.49e-209	11
874	2.75e-213	RCSD1	-0.768126	0.028	0.274	9.96e-209	11
875	6.45e-213	POGLUT3	0.252468	0.222	0.074	2.33e-208	11
876	8.86e-213	SOD1	0.36789	0.702	0.417	3.21e-208	11
877	2.82e-212	SSR3	0.382979	0.631	0.357	1.02e-207	11
878	4.27e-212	TMED10	0.368779	0.639	0.37	1.55e-207	11
879	2.62e-211	LY6E	0.309783	0.431	0.198	9.48e-207	11
880	4.70e-211	RTL8C	0.320772	0.527	0.261	1.70e-206	11
881	7.55e-210	TM9SF3	0.307389	0.585	0.312	2.73e-205	11
882	1.05e-209	SMAP2	-1.10389	0.181	0.412	3.78e-205	11
883	1.37e-209	FAM49B	-0.840966	0.127	0.37	4.95e-205	11
884	3.19e-209	HMGB2	-1.22842	0.384	0.548	1.16e-204	11
885	3.20e-209	MGST3	0.328803	0.665	0.363	1.16e-204	11
886	3.40e-209	FGL2	0.848617	0.438	0.22	1.23e-204	11
887	3.47e-209	FAM13A	0.269966	0.212	0.07	1.26e-204	11
888	6.10e-209	TMEM43	0.290305	0.481	0.231	2.21e-204	11
889	1.83e-208	A4GALT	0.267373	0.274	0.103	6.63e-204	11
890	6.25e-208	YWHAQ	0.336364	0.654	0.372	2.26e-203	11
891	9.03e-208	CHD9	0.356779	0.478	0.237	3.27e-203	11
892	2.65e-207	SLPI	0.463142	0.2	0.063	9.59e-203	11
893	3.02e-207	PTMS	0.310311	0.677	0.352	1.09e-202	11
894	3.09e-206	PGD	-1.05176	0.216	0.438	1.12e-201	11
895	4.16e-206	MORF4L2	0.288508	0.534	0.273	1.50e-201	11
896	7.50e-206	LAMB1	0.500941	0.355	0.156	2.72e-201	11
897	1.84e-205	SPPL2A	0.280306	0.483	0.235	6.67e-201	11
898	8.14e-205	S100A12	-1.68331	0.161	0.398	2.95e-200	11
899	1.59e-204	SEC24D	0.250567	0.375	0.165	5.74e-200	11
900	2.63e-204	RHOQ	0.251603	0.488	0.235	9.52e-200	11
901	4.56e-203	EGR1	0.574394	0.626	0.379	1.65e-198	11
902	5.66e-203	SMAD5	0.282781	0.359	0.155	2.05e-198	11
903	1.36e-202	PTK2B	-0.842313	0.102	0.342	4.91e-198	11
904	4.11e-202	FKBP1A	-0.734684	0.586	0.671	1.49e-197	11
905	6.50e-202	ESD	0.310304	0.522	0.268	2.35e-197	11
906	8.33e-202	IKZF1	-0.77697	0.032	0.266	3.01e-197	11
907	8.45e-202	TNS1	0.276547	0.423	0.193	3.06e-197	11
908	1.26e-201	KCNQ1OT1	0.367904	0.162	0.046	4.58e-197	11
909	1.58e-201	PIGT	0.272691	0.409	0.19	5.72e-197	11
910	1.73e-201	BCAP29	0.272162	0.394	0.179	6.25e-197	11
911	5.26e-201	H2AFY	-0.842523	0.321	0.506	1.90e-196	11
912	6.98e-201	C1orf162	-0.818099	0.056	0.294	2.53e-196	11
913	1.95e-200	MYOF	0.299175	0.4	0.182	7.07e-196	11
914	5.51e-200	TGFBR2	0.25437	0.552	0.281	2.00e-195	11
915	1.06e-199	SCX	0.365034	0.123	0.03	3.85e-195	11
916	1.54e-199	IL2RG	-1.01408	0.092	0.327	5.56e-195	11
917	9.72e-198	ID4	0.285089	0.178	0.054	3.52e-193	11
918	1.38e-197	NDUFS4	0.263643	0.377	0.168	4.99e-193	11
919	8.68e-197	ARPC1B	-0.684447	0.473	0.606	3.14e-192	11
920	9.46e-197	INPP5D	-0.715154	0.029	0.258	3.43e-192	11
921	6.12e-195	C5AR1	-1.54612	0.177	0.392	2.22e-190	11
922	1.84e-194	ARPC5	-0.751841	0.603	0.683	6.66e-190	11
923	2.37e-194	SRPX2	0.258829	0.16	0.047	8.58e-190	11
924	3.57e-194	S100P	-1.27053	0.054	0.287	1.29e-189	11
925	9.40e-194	ARPC3	-0.65593	0.563	0.662	3.40e-189	11
926	1.39e-193	SERINC1	0.324463	0.635	0.366	5.01e-189	11
927	8.38e-193	HTATSF1	0.265689	0.351	0.154	3.03e-188	11
928	1.99e-192	DYSF	-0.837587	0.055	0.285	7.19e-188	11
929	1.39e-191	PRKCB	-0.810773	0.027	0.25	5.03e-187	11
930	1.91e-191	RCN1	0.279097	0.425	0.197	6.93e-187	11
931	2.82e-191	EFHD2	-0.894205	0.314	0.502	1.02e-186	11
932	1.07e-190	SKI	0.273337	0.496	0.249	3.88e-186	11
933	1.67e-190	ANXA5	0.410026	0.8	0.521	6.04e-186	11
934	5.97e-190	DOCK8	-0.724304	0.053	0.283	2.16e-185	11
935	6.28e-190	GABARAP	-0.675972	0.657	0.718	2.27e-185	11
936	7.91e-190	CARD16	-0.758878	0.054	0.283	2.86e-185	11
937	2.84e-189	BIN2	-0.75647	0.04	0.269	1.03e-184	11
938	4.24e-189	CDA	-1.07686	0.111	0.34	1.53e-184	11
939	3.29e-188	IGHA1	-1.31907	0.27	0.101	1.19e-183	11
940	7.18e-188	FNDC3B	0.274081	0.526	0.27	2.60e-183	11
941	2.19e-187	BTG3	0.257711	0.247	0.094	7.93e-183	11
942	9.33e-187	PTPN6	-0.729597	0.055	0.282	3.38e-182	11
943	1.17e-186	PPP1CC	0.417562	0.491	0.269	4.24e-182	11
944	2.41e-186	AIF1	-1.01935	0.074	0.298	8.71e-182	11
945	8.33e-186	CD151	0.260371	0.567	0.295	3.01e-181	11
946	9.46e-186	RIPOR2	-1.10259	0.091	0.318	3.42e-181	11
947	3.69e-185	MDK	0.551257	0.267	0.108	1.34e-180	11
948	6.36e-185	TMEM14C	0.344371	0.448	0.227	2.30e-180	11
949	1.22e-184	CRIP1	0.544319	0.553	0.297	4.41e-180	11
950	1.38e-184	GRK2	-0.817132	0.187	0.402	5.01e-180	11
951	4.64e-184	LNPK	0.281241	0.326	0.14	1.68e-179	11
952	2.97e-183	SPCS2	0.304533	0.62	0.355	1.08e-178	11
953	3.37e-183	LILRB2	-0.807513	0.041	0.262	1.22e-178	11
954	4.43e-183	CCND3	-0.815468	0.165	0.384	1.60e-178	11
955	5.98e-183	ATL3	0.259978	0.443	0.217	2.16e-178	11
956	6.47e-183	KRT10	0.354059	0.509	0.269	2.34e-178	11
957	4.86e-182	PHLDA1	0.570345	0.29	0.124	1.76e-177	11
958	4.95e-182	SORL1	-0.900507	0.048	0.268	1.79e-177	11
959	1.99e-180	DBN1	0.262425	0.291	0.119	7.20e-176	11
960	2.08e-180	P4HA1	0.262897	0.384	0.177	7.55e-176	11
961	4.66e-179	ARF4	0.300809	0.623	0.36	1.69e-174	11
962	6.44e-179	HDLBP	0.308278	0.61	0.344	2.33e-174	11
963	7.63e-179	ZRANB2	0.292214	0.526	0.282	2.76e-174	11
964	9.80e-179	PPA1	0.253668	0.462	0.232	3.55e-174	11
965	3.74e-178	CRTAP	0.318634	0.64	0.367	1.35e-173	11
966	1.88e-177	SYK	-0.754723	0.041	0.255	6.79e-173	11
967	1.51e-176	IGKC	-1.3918	0.546	0.369	5.47e-172	11
968	6.10e-176	DOK3	-0.785176	0.031	0.242	2.21e-171	11
969	2.83e-175	NEAT1	0.445023	0.809	0.664	1.02e-170	11
970	4.42e-175	TRIM8	0.264407	0.425	0.209	1.60e-170	11
971	4.15e-174	PURA	0.259982	0.407	0.197	1.50e-169	11
972	5.36e-174	CD48	-0.751961	0.023	0.23	1.94e-169	11
973	1.16e-173	HCK	-0.726547	0.032	0.242	4.20e-169	11
974	1.65e-173	FKBP2	0.317123	0.211	0.077	5.96e-169	11
975	2.10e-173	ITPRIPL2	0.262006	0.361	0.164	7.61e-169	11
976	4.14e-173	CTNNA1	0.267958	0.493	0.257	1.50e-168	11
977	6.20e-173	PMEPA1	0.287352	0.331	0.148	2.25e-168	11
978	7.55e-173	EBF3	0.338979	0.148	0.044	2.73e-168	11
979	9.97e-173	COL16A1	0.259172	0.196	0.068	3.61e-168	11
980	1.28e-172	PGLYRP1	-1.73326	0.107	0.322	4.64e-168	11
981	2.05e-172	RPS29	-0.633793	0.921	0.887	7.41e-168	11
982	5.33e-172	CXXC5	0.260944	0.348	0.16	1.93e-167	11
983	3.57e-171	GALNT15	0.267388	0.231	0.086	1.29e-166	11
984	4.34e-171	APLP2	0.718655	0.714	0.511	1.57e-166	11
985	7.31e-171	SKP1	0.337415	0.699	0.445	2.65e-166	11
986	1.36e-170	IGSF6	-0.871226	0.028	0.232	4.93e-166	11
987	7.51e-170	LBR	-0.82323	0.162	0.374	2.72e-165	11
988	1.08e-169	HSPA1A	-1.25088	0.77	0.795	3.90e-165	11
989	1.67e-169	PLAC8	-0.878585	0.027	0.229	6.03e-165	11
990	2.47e-169	STXBP2	-0.726045	0.056	0.267	8.93e-165	11
991	9.07e-169	MATN2	0.316235	0.246	0.097	3.28e-164	11
992	1.99e-168	TMCO1	0.260493	0.521	0.28	7.20e-164	11
993	4.11e-168	CAPZA1	-0.710364	0.494	0.604	1.49e-163	11
994	7.99e-168	MYL6	-0.446716	0.857	0.847	2.89e-163	11
995	8.59e-168	BCL2A1	-1.10015	0.058	0.266	3.11e-163	11
996	8.72e-168	CD47	0.300431	0.609	0.366	3.16e-163	11
997	1.55e-167	LRPAP1	0.28547	0.385	0.187	5.61e-163	11
998	2.16e-167	DNAJB4	0.250392	0.304	0.132	7.82e-163	11
999	2.82e-167	LPP	0.276156	0.436	0.218	1.02e-162	11
1000	3.51e-167	STK17B	-0.884465	0.203	0.41	1.27e-162	11
1001	2.04e-166	TMEM119	0.352635	0.179	0.061	7.38e-162	11
1002	1.07e-165	BAZ1A	-0.723761	0.208	0.412	3.87e-161	11
1003	1.62e-165	PGK1	-0.638777	0.474	0.586	5.87e-161	11
1004	5.23e-164	LCP2	-0.693106	0.035	0.235	1.89e-159	11
1005	1.06e-163	IL17RA	-0.842346	0.133	0.342	3.82e-159	11
1006	1.57e-163	ROCK2	0.266735	0.472	0.247	5.67e-159	11
1007	2.43e-163	CXCL14	1.33572	0.146	0.045	8.79e-159	11
1008	3.24e-163	ZFP36L1	0.49321	0.783	0.528	1.17e-158	11
1009	1.18e-162	PARVG	-0.665209	0.046	0.249	4.28e-158	11
1010	3.11e-162	PRDX1	0.289426	0.634	0.366	1.12e-157	11
1011	4.08e-162	ARL2	0.26773	0.369	0.177	1.48e-157	11
1012	2.58e-161	MINOS1	0.353781	0.228	0.09	9.33e-157	11
1013	4.03e-161	CLEC12A	-0.705895	0.03	0.23	1.46e-156	11
1014	4.18e-160	MSRB1	-0.845649	0.086	0.291	1.51e-155	11
1015	1.59e-158	RPL27	-0.438035	0.809	0.795	5.74e-154	11
1016	5.17e-158	TALDO1	-0.794686	0.375	0.523	1.87e-153	11
1017	1.99e-157	LILRB3	-0.806069	0.031	0.226	7.22e-153	11
1018	3.71e-156	SDF4	0.258798	0.475	0.254	1.34e-151	11
1019	5.52e-156	TUBA4A	-0.732847	0.047	0.245	2.00e-151	11
1020	5.76e-156	RPL39	-0.429176	0.925	0.898	2.08e-151	11
1021	4.42e-155	PHPT1	0.314648	0.343	0.163	1.60e-150	11
1022	1.16e-154	ACAP1	-0.689418	0.038	0.233	4.22e-150	11
1023	1.58e-154	ATF3	0.375775	0.258	0.109	5.73e-150	11
1024	8.66e-154	DYNC1I2	0.264573	0.589	0.338	3.13e-149	11
1025	9.49e-154	CYP4F3	-0.961191	0.036	0.23	3.43e-149	11
1026	2.58e-153	SERPINA1	-1.02357	0.117	0.309	9.34e-149	11
1027	5.26e-153	ALOX5	-0.684962	0.029	0.219	1.91e-148	11
1028	6.49e-152	UCP2	-0.827206	0.098	0.293	2.35e-147	11
1029	1.75e-151	ZFHX3	0.265069	0.366	0.177	6.35e-147	11
1030	2.61e-151	ELL2	0.260191	0.325	0.151	9.45e-147	11
1031	7.21e-151	LMO4	0.317391	0.509	0.283	2.61e-146	11
1032	8.09e-151	DAD1	0.307232	0.669	0.409	2.93e-146	11
1033	2.80e-150	VAMP8	-0.824453	0.102	0.293	1.01e-145	11
1034	7.26e-150	ICAM3	-0.754146	0.079	0.274	2.63e-145	11
1035	7.80e-150	BPI	-1.50772	0.052	0.243	2.82e-145	11
1036	1.06e-149	SAMSN1	-0.790894	0.049	0.243	3.83e-145	11
1037	1.13e-149	KDELR1	0.256335	0.637	0.372	4.10e-145	11
1038	5.72e-149	CD93	-0.793303	0.064	0.259	2.07e-144	11
1039	1.44e-148	PRR13	-0.749349	0.367	0.51	5.20e-144	11
1040	1.87e-148	SOX4	0.300283	0.383	0.191	6.76e-144	11
1041	2.69e-148	LIMD2	-0.777837	0.091	0.288	9.74e-144	11
1042	3.03e-148	APMAP	-0.919786	0.266	0.438	1.10e-143	11
1043	3.26e-148	ADAMTSL4	0.269449	0.268	0.116	1.18e-143	11
1044	5.52e-148	TSC22D3	0.282705	0.665	0.436	2.00e-143	11
1045	7.09e-148	SLC2A3	-0.852027	0.213	0.4	2.57e-143	11
1046	8.54e-148	ADAM8	-0.754387	0.036	0.222	3.09e-143	11
1047	1.67e-147	LAMP1	0.256696	0.708	0.453	6.04e-143	11
1048	3.37e-147	COL4A2	-0.318617	0.497	0.247	1.22e-142	11
1049	8.38e-147	NR3C1	0.2504	0.521	0.291	3.03e-142	11
1050	1.07e-145	QPCT	-0.803991	0.044	0.229	3.88e-141	11
1051	1.08e-145	NCKAP1L	-0.583609	0.027	0.208	3.92e-141	11
1052	1.85e-145	BTG1	-0.733049	0.595	0.679	6.70e-141	11
1053	7.93e-145	THY1	0.374931	0.314	0.148	2.87e-140	11
1054	1.56e-144	GRB2	-0.731898	0.389	0.517	5.63e-140	11
1055	2.99e-144	ANXA3	-0.959875	0.045	0.23	1.08e-139	11
1056	3.32e-144	RGS19	-0.630259	0.061	0.25	1.20e-139	11
1057	4.77e-144	MSN	-0.547606	0.607	0.675	1.73e-139	11
1058	4.63e-143	PTPRE	-0.718701	0.088	0.28	1.68e-138	11
1059	2.98e-142	MYL12A	-0.537913	0.651	0.702	1.08e-137	11
1060	3.75e-142	SPRY1	0.335165	0.303	0.141	1.36e-137	11
1061	4.92e-142	VNN2	-1.21286	0.032	0.208	1.78e-137	11
1062	5.25e-142	JAML	-0.803949	0.041	0.222	1.90e-137	11
1063	6.12e-142	IQGAP2	-0.622571	0.045	0.229	2.22e-137	11
1064	2.58e-141	RHOB	0.489775	0.71	0.546	9.36e-137	11
1065	2.65e-141	LPL	0.630264	0.103	0.027	9.58e-137	11
1066	1.22e-140	ADAMTS1	0.339659	0.264	0.115	4.43e-136	11
1067	8.01e-140	AL034397.3	-0.904742	0.041	0.221	2.90e-135	11
1068	1.75e-138	FLOT2	-0.735724	0.14	0.323	6.32e-134	11
1069	4.65e-138	SEPTIN11	0.333912	0.289	0.135	1.68e-133	11
1070	5.23e-138	SLIT3	0.318919	0.199	0.079	1.89e-133	11
1071	7.31e-138	AES	0.282238	0.212	0.085	2.65e-133	11
1072	9.26e-138	ARPC4	-0.628601	0.426	0.541	3.35e-133	11
1073	9.37e-138	RPL17	-0.586786	0.797	0.801	3.39e-133	11
1074	2.79e-137	SOCS3	0.281449	0.518	0.307	1.01e-132	11
1075	2.52e-134	NDUFC1	0.261055	0.469	0.263	9.12e-130	11
1076	4.83e-134	NRP1	0.254695	0.319	0.152	1.75e-129	11
1077	8.84e-134	LYN	-0.794909	0.15	0.326	3.20e-129	11
1078	3.08e-133	RETN	-1.09198	0.03	0.202	1.11e-128	11
1079	3.83e-133	YWHAZ	-0.475287	0.739	0.772	1.39e-128	11
1080	5.44e-133	CD52	-1.04159	0.048	0.22	1.97e-128	11
1081	1.71e-132	PIK3CD	-0.600584	0.02	0.186	6.20e-128	11
1082	2.28e-132	THEMIS2	-0.597794	0.048	0.222	8.24e-128	11
1083	3.30e-132	ABCC9	0.307203	0.131	0.042	1.19e-127	11
1084	4.43e-132	HIC1	0.268185	0.159	0.057	1.60e-127	11
1085	2.15e-131	SLC16A3	-0.57366	0.051	0.228	7.78e-127	11
1086	5.42e-131	RASSF5	-0.657626	0.052	0.226	1.96e-126	11
1087	1.29e-130	BASP1	-0.983296	0.411	0.532	4.67e-126	11
1088	1.56e-130	RPL27A	-0.528118	0.857	0.818	5.64e-126	11
1089	5.35e-130	CAPG	-0.683587	0.213	0.388	1.94e-125	11
1090	8.36e-130	SERPINB1	-0.939729	0.423	0.525	3.02e-125	11
1091	8.39e-130	ANXA1	0.336432	0.847	0.661	3.04e-125	11
1092	1.03e-129	P2RY13	-0.812296	0.022	0.185	3.74e-125	11
1093	3.10e-129	PLCB2	-0.570457	0.026	0.193	1.12e-124	11
1094	3.86e-129	CDC42	-0.411828	0.758	0.77	1.40e-124	11
1095	3.93e-129	BST1	-0.682718	0.073	0.249	1.42e-124	11
1096	4.93e-129	MT-CO2	-0.354244	0.982	0.979	1.79e-124	11
1097	1.27e-127	FCGR2A	-0.811802	0.047	0.215	4.61e-123	11
1098	4.82e-127	MCEMP1	-0.65356	0.02	0.182	1.75e-122	11
1099	6.95e-127	SIRPB1	-0.661855	0.024	0.186	2.51e-122	11
1100	1.10e-126	TNFRSF1B	-0.615951	0.074	0.247	3.99e-122	11
1101	3.89e-126	PYGL	-0.888967	0.155	0.331	1.41e-121	11
1102	2.30e-125	H2AFJ	0.299274	0.303	0.15	8.31e-121	11
1103	2.55e-125	NID1	0.444761	0.244	0.112	9.24e-121	11
1104	2.68e-125	CMIP	-0.696833	0.269	0.428	9.70e-121	11
1105	6.91e-125	GRN	-0.772809	0.563	0.61	2.50e-120	11
1106	2.10e-124	THBS1	0.53175	0.264	0.125	7.62e-120	11
1107	8.29e-124	CDC42SE1	-0.681714	0.325	0.467	3.00e-119	11
1108	1.45e-123	C8orf59	0.271249	0.197	0.081	5.24e-119	11
1109	2.73e-123	TNS2	0.27678	0.185	0.074	9.87e-119	11
1110	6.79e-123	RPS10	0.344639	0.513	0.318	2.46e-118	11
1111	2.96e-122	MMP9	-1.46971	0.109	0.279	1.07e-117	11
1112	5.23e-122	PRKCD	-0.667957	0.099	0.27	1.89e-117	11
1113	1.14e-121	BZW1	0.291274	0.604	0.396	4.12e-117	11
1114	4.68e-121	SPN	-0.690051	0.022	0.176	1.69e-116	11
1115	2.16e-120	CST7	-1.00796	0.026	0.181	7.83e-116	11
1116	5.39e-120	MXD1	-0.909151	0.127	0.295	1.95e-115	11
1117	1.46e-119	CRISP3	-1.21327	0.036	0.195	5.27e-115	11
1118	2.25e-119	RGS2	-1.44755	0.312	0.45	8.15e-115	11
1119	7.10e-119	TWISTNB	0.36537	0.209	0.091	2.57e-114	11
1120	1.12e-118	PLP2	-0.638414	0.508	0.588	4.05e-114	11
1121	2.52e-118	PPDPF	0.28819	0.712	0.472	9.11e-114	11
1122	3.24e-118	KCNAB2	-0.557206	0.059	0.222	1.17e-113	11
1123	4.49e-118	MS4A6A	-0.959467	0.052	0.208	1.62e-113	11
1124	7.71e-118	LAT2	-0.491757	0.016	0.166	2.79e-113	11
1125	4.49e-117	DOCK2	-0.451781	0.024	0.176	1.63e-112	11
1126	1.12e-116	STK4	-0.734655	0.213	0.369	4.04e-112	11
1127	3.45e-116	ARG1	-0.804565	0.023	0.174	1.25e-111	11
1128	1.30e-115	IFITM2	-1.13255	0.776	0.783	4.71e-111	11
1129	4.34e-115	CFP	-0.52265	0.022	0.171	1.57e-110	11
1130	1.22e-114	BRI3	-0.611046	0.595	0.633	4.40e-110	11
1131	1.42e-114	ANP32A	-0.745084	0.416	0.518	5.15e-110	11
1132	2.94e-114	RASGRP4	-0.588656	0.029	0.18	1.06e-109	11
1133	4.48e-114	CAMP	-1.97228	0.106	0.27	1.62e-109	11
1134	8.59e-114	PADI2	-0.605272	0.018	0.165	3.11e-109	11
1135	9.97e-114	HK3	-0.554999	0.024	0.175	3.61e-109	11
1136	7.16e-113	TNFAIP8	-0.563347	0.083	0.244	2.59e-108	11
1137	1.83e-112	LITAF	-0.969106	0.396	0.494	6.62e-108	11
1138	1.84e-112	TRIB1	-0.846745	0.112	0.274	6.64e-108	11
1139	2.52e-112	RPL24	0.323257	0.843	0.634	9.11e-108	11
1140	7.51e-112	PTAFR	-0.608525	0.035	0.185	2.72e-107	11
1141	1.02e-111	CALM1	-0.409327	0.82	0.831	3.68e-107	11
1142	5.44e-111	ENTPD1	-0.526041	0.061	0.219	1.97e-106	11
1143	3.06e-110	FCGR3B	-1.66517	0.067	0.219	1.11e-105	11
1144	3.07e-110	EVI2A	-0.59592	0.068	0.225	1.11e-105	11
1145	7.77e-110	LRRFIP1	-0.57556	0.419	0.527	2.81e-105	11
1146	1.09e-109	RAI14	0.255866	0.26	0.125	3.93e-105	11
1147	2.46e-109	FGD3	-0.567191	0.029	0.175	8.89e-105	11
1148	4.27e-109	C19orf38	-0.488895	0.019	0.161	1.54e-104	11
1149	5.95e-109	PIK3AP1	-0.461137	0.016	0.156	2.15e-104	11
1150	2.27e-108	ARHGEF1	-0.613185	0.183	0.34	8.23e-104	11
1151	6.94e-108	CLTB	0.263672	0.306	0.162	2.51e-103	11
1152	1.11e-107	GIMAP4	-0.504729	0.032	0.176	4.03e-103	11
1153	1.15e-107	CMTM6	-0.685112	0.393	0.496	4.17e-103	11
1154	2.67e-107	GNG2	-0.623573	0.103	0.264	9.68e-103	11
1155	6.28e-107	SPINT2	-0.437348	0.024	0.167	2.27e-102	11
1156	6.88e-107	FERMT3	-0.479924	0.047	0.196	2.49e-102	11
1157	7.54e-107	RASSF2	-0.619574	0.106	0.266	2.73e-102	11
1158	2.79e-106	RBMS1	0.252754	0.597	0.387	1.01e-101	11
1159	5.66e-106	ANP32B	-0.640001	0.497	0.579	2.05e-101	11
1160	1.37e-105	PLAUR	-0.83135	0.213	0.359	4.96e-101	11
1161	4.92e-105	FRAT2	-0.641598	0.05	0.196	1.78e-100	11
1162	2.89e-104	MORF4L1	0.261097	0.768	0.557	1.05e-99	11
1163	3.19e-103	GIMAP7	-0.544996	0.037	0.179	1.16e-98	11
1164	4.51e-103	SELPLG	-0.484933	0.022	0.159	1.63e-98	11
1165	5.29e-103	STK10	-0.476372	0.044	0.19	1.92e-98	11
1166	5.56e-103	CD177	-1.12886	0.058	0.205	2.01e-98	11
1167	6.24e-103	SRP14	0.31495	0.754	0.542	2.26e-98	11
1168	8.96e-103	CDC42EP3	-0.527013	0.104	0.265	3.24e-98	11
1169	9.33e-103	CD55	0.501764	0.565	0.405	3.38e-98	11
1170	1.00e-102	LILRA6	-0.519932	0.019	0.154	3.62e-98	11
1171	1.98e-102	CD74	-1.44842	0.533	0.599	7.17e-98	11
1172	2.59e-102	MEGF9	-0.995681	0.235	0.367	9.36e-98	11
1173	5.28e-101	TRAF3IP3	-0.479515	0.019	0.153	1.91e-96	11
1174	1.25e-100	RASGRP2	-0.492863	0.032	0.171	4.54e-96	11
1175	1.34e-100	SYNGR2	-0.429817	0.07	0.217	4.84e-96	11
1176	1.13e-99	STX3	-0.58554	0.052	0.195	4.09e-95	11
1177	1.43e-99	ATP2A3	-0.538142	0.04	0.18	5.19e-95	11
1178	2.18e-99	AKNA	-0.626798	0.074	0.219	7.90e-95	11
1179	3.48e-99	NKG7	-1.06926	0.052	0.191	1.26e-94	11
1180	4.39e-99	LGALS9	-0.447169	0.051	0.192	1.59e-94	11
1181	1.81e-98	RGS18	-0.510464	0.019	0.15	6.55e-94	11
1182	3.42e-98	ATP6V0B	-0.576523	0.384	0.485	1.24e-93	11
1183	4.16e-98	TMEM154	-0.673745	0.05	0.189	1.51e-93	11
1184	5.96e-98	RAB31	-0.632845	0.369	0.476	2.16e-93	11
1185	6.57e-98	PREX1	-0.662418	0.142	0.286	2.38e-93	11
1186	6.96e-98	TPSB2	-0.921795	0.12	0.041	2.52e-93	11
1187	1.68e-97	ADA2	-0.581902	0.046	0.183	6.09e-93	11
1188	8.66e-97	DEDD2	-0.585493	0.106	0.253	3.14e-92	11
1189	2.51e-96	ITGAX	-0.555632	0.026	0.158	9.09e-92	11
1190	3.03e-96	TAGAP	-0.58361	0.026	0.155	1.10e-91	11
1191	5.33e-96	RNASET2	-0.696181	0.224	0.356	1.93e-91	11
1192	6.42e-96	CYFIP2	-0.5837	0.068	0.212	2.32e-91	11
1193	6.77e-96	CDKN2D	-0.636129	0.098	0.241	2.45e-91	11
1194	1.02e-95	RNASE2	-1.05738	0.025	0.153	3.70e-91	11
1195	1.40e-95	LTB	-0.739016	0.032	0.164	5.08e-91	11
1196	4.32e-95	CSF2RB	-0.506188	0.026	0.156	1.57e-90	11
1197	1.61e-94	SPP1	0.659223	0.171	0.072	5.81e-90	11
1198	1.62e-94	CLEC4E	-0.917259	0.051	0.183	5.87e-90	11
1199	1.95e-94	SGMS2	0.339527	0.2	0.093	7.05e-90	11
1200	2.92e-94	SKAP2	-0.5649	0.222	0.375	1.06e-89	11
1201	3.49e-94	CEACAM8	-1.13918	0.029	0.157	1.26e-89	11
1202	4.39e-94	POLR2L	0.336219	0.461	0.289	1.59e-89	11
1203	4.59e-94	HMGA1	-0.49303	0.046	0.181	1.66e-89	11
1204	5.40e-94	PTPRJ	-0.466958	0.034	0.167	1.96e-89	11
1205	9.01e-94	LILRA5	-0.507753	0.023	0.15	3.26e-89	11
1206	1.27e-93	MMP8	-1.35723	0.036	0.167	4.61e-89	11
1207	1.51e-93	CXCR2	-1.02513	0.027	0.154	5.46e-89	11
1208	4.17e-93	F11R	-0.470636	0.037	0.168	1.51e-88	11
1209	4.67e-93	ARHGAP25	-0.487546	0.022	0.147	1.69e-88	11
1210	8.61e-93	SH3KBP1	-0.575774	0.292	0.418	3.12e-88	11
1211	1.28e-92	RESF1	-0.771844	0.084	0.222	4.63e-88	11
1212	3.09e-92	STX11	-0.469888	0.025	0.151	1.12e-87	11
1213	3.41e-92	EDIL3	0.305033	0.187	0.087	1.23e-87	11
1214	3.82e-92	GPR160	-0.466693	0.012	0.131	1.38e-87	11
1215	8.62e-92	CAPZB	-0.408443	0.642	0.696	3.12e-87	11
1216	1.00e-91	ARHGAP15	-0.399155	0.024	0.151	3.63e-87	11
1217	1.05e-91	MPEG1	-0.59865	0.026	0.151	3.81e-87	11
1218	2.85e-91	SERPINB10	-0.535911	0.008	0.125	1.03e-86	11
1219	8.27e-91	PNP	-0.529498	0.121	0.264	2.99e-86	11
1220	1.16e-90	LRG1	-0.518995	0.013	0.132	4.18e-86	11
1221	1.25e-90	PXN	-0.541637	0.147	0.289	4.52e-86	11
1222	1.29e-90	HLA-DRB5	-0.734692	0.034	0.163	4.66e-86	11
1223	2.34e-90	NDUFA11	0.250153	0.414	0.25	8.47e-86	11
1224	6.22e-90	RAB11FIP1	-0.569298	0.061	0.196	2.25e-85	11
1225	2.83e-89	ITGAL	-0.52686	0.03	0.154	1.03e-84	11
1226	3.62e-89	PIK3CG	-0.442833	0.019	0.139	1.31e-84	11
1227	1.11e-88	RASSF3	-0.497228	0.075	0.211	4.03e-84	11
1228	1.32e-88	AGTPBP1	-0.493739	0.063	0.196	4.78e-84	11
1229	1.65e-88	LRRC25	-0.444632	0.021	0.141	5.99e-84	11
1230	2.91e-88	NFAM1	-0.444825	0.019	0.138	1.05e-83	11
1231	4.95e-88	SNX10	-0.623365	0.092	0.224	1.79e-83	11
1232	3.05e-87	RPS6KA1	-0.397942	0.023	0.144	1.10e-82	11
1233	3.56e-87	MARCKS	0.427259	0.573	0.39	1.29e-82	11
1234	7.16e-87	MSX1	0.340989	0.159	0.07	2.59e-82	11
1235	1.05e-86	R3HDM4	-0.686544	0.208	0.337	3.78e-82	11
1236	1.80e-86	GGT5	0.364933	0.168	0.076	6.52e-82	11
1237	2.27e-86	GRK6	-0.511371	0.069	0.201	8.20e-82	11
1238	3.73e-86	FMNL1	-0.699484	0.236	0.357	1.35e-81	11
1239	5.91e-86	PCBP1	-0.4294	0.631	0.64	2.14e-81	11
1240	1.11e-85	LCN2	-1.85347	0.101	0.234	4.02e-81	11
1241	3.25e-85	OSCAR	-0.407217	0.019	0.135	1.18e-80	11
1242	3.36e-85	CR1	-0.517637	0.013	0.125	1.22e-80	11
1243	3.49e-85	CTSC	-0.360594	0.14	0.291	1.26e-80	11
1244	7.07e-85	PAG1	-0.539669	0.06	0.188	2.56e-80	11
1245	9.41e-85	LTA4H	-0.852134	0.228	0.347	3.41e-80	11
1246	1.65e-84	CTSH	-0.466906	0.11	0.248	5.96e-80	11
1247	2.93e-84	CEACAM1	-0.658215	0.025	0.143	1.06e-79	11
1248	3.27e-84	GAPT	-0.433696	0.013	0.125	1.18e-79	11
1249	4.17e-84	IER5	-0.619952	0.117	0.252	1.51e-79	11
1250	6.53e-84	PRAM1	-0.397457	0.016	0.129	2.36e-79	11
1251	8.57e-84	CPVL	-0.57752	0.042	0.164	3.10e-79	11
1252	1.13e-83	CPNE2	-0.486968	0.1	0.233	4.08e-79	11
1253	1.29e-83	TMC8	-0.408081	0.022	0.138	4.68e-79	11
1254	5.04e-83	PPP2R5A	-0.677479	0.232	0.351	1.83e-78	11
1255	7.97e-83	RABAC1	0.353185	0.406	0.262	2.88e-78	11
1256	1.20e-82	LAIR1	-0.414016	0.023	0.137	4.33e-78	11
1257	1.31e-82	SLC11A1	-0.560955	0.033	0.151	4.74e-78	11
1258	2.26e-82	HSPA6	-1.05416	0.061	0.191	8.18e-78	11
1259	2.72e-82	IQGAP1	-0.478562	0.696	0.689	9.84e-78	11
1260	3.15e-82	CRYBG1	-0.462387	0.078	0.207	1.14e-77	11
1261	6.35e-82	MBOAT7	-0.652353	0.145	0.276	2.30e-77	11
1262	8.03e-82	ATG16L2	-0.459757	0.046	0.168	2.91e-77	11
1263	2.98e-81	PILRA	-0.40707	0.014	0.123	1.08e-76	11
1264	1.58e-80	HP	-0.627918	0.045	0.169	5.73e-76	11
1265	2.34e-80	PLCG2	-0.390625	0.031	0.147	8.46e-76	11
1266	2.56e-80	ID2	-0.753576	0.34	0.447	9.26e-76	11
1267	2.98e-80	AP1S2	-0.600692	0.24	0.355	1.08e-75	11
1268	1.15e-79	FLI1	-0.406925	0.074	0.199	4.15e-75	11
1269	1.64e-79	IPCEF1	-0.43109	0.024	0.137	5.93e-75	11
1270	2.01e-79	HLA-DMB	-0.488751	0.031	0.145	7.28e-75	11
1271	1.14e-78	LYST	-0.62615	0.217	0.337	4.13e-74	11
1272	1.96e-78	ACTN4	-0.483643	0.509	0.561	7.10e-74	11
1273	4.41e-78	TESC	-0.308328	0.013	0.119	1.60e-73	11
1274	6.35e-78	JCHAIN	-0.775159	0.111	0.041	2.30e-73	11
1275	1.14e-77	ARID3A	-0.442007	0.046	0.164	4.13e-73	11
1276	2.96e-77	VAV1	-0.348963	0.015	0.121	1.07e-72	11
1277	4.98e-77	CMTM2	-0.86436	0.025	0.132	1.80e-72	11
1278	5.95e-77	SEMA4A	-0.438649	0.038	0.152	2.15e-72	11
1279	6.05e-77	CXCR1	-0.654302	0.019	0.125	2.19e-72	11
1280	6.53e-77	ARHGAP4	-0.334223	0.019	0.127	2.36e-72	11
1281	7.84e-77	CYTIP	-0.466707	0.024	0.131	2.84e-72	11
1282	8.46e-77	NFE2	-0.331475	0.01	0.112	3.06e-72	11
1283	8.79e-77	IL6R	-0.655075	0.153	0.277	3.18e-72	11
1284	1.54e-76	LTF	-2.22395	0.227	0.336	5.57e-72	11
1285	3.33e-76	CKLF	-0.628386	0.253	0.365	1.20e-71	11
1286	3.65e-76	MARC1	-0.464314	0.034	0.147	1.32e-71	11
1287	5.81e-76	NADK	-0.637052	0.187	0.306	2.10e-71	11
1288	8.43e-76	SHKBP1	-0.512371	0.111	0.234	3.05e-71	11
1289	8.46e-76	PTBP3	-0.541405	0.317	0.42	3.06e-71	11
1290	1.06e-75	POU2F2	-0.414177	0.02	0.126	3.82e-71	11
1291	1.24e-75	IL1RN	-0.475652	0.016	0.119	4.50e-71	11
1292	2.58e-75	RPL31	-0.535295	0.86	0.815	9.34e-71	11
1293	7.95e-75	PKM	-0.444492	0.659	0.656	2.88e-70	11
1294	8.18e-75	AMPD3	-0.417878	0.022	0.128	2.96e-70	11
1295	1.54e-74	ORM1	-0.524611	0.006	0.102	5.59e-70	11
1296	2.51e-74	PIK3R5	-0.376096	0.021	0.125	9.10e-70	11
1297	2.59e-74	FABP5	-0.549826	0.097	0.225	9.36e-70	11
1298	5.69e-74	HLA-DQB1	-0.968762	0.068	0.183	2.06e-69	11
1299	9.50e-74	ARHGAP45	-0.339787	0.021	0.125	3.44e-69	11
1300	1.03e-73	PAK1	-0.572389	0.128	0.248	3.74e-69	11
1301	2.77e-73	DNAJB1	-1.03485	0.528	0.579	1.00e-68	11
1302	8.32e-73	IGLC3	-1.04752	0.106	0.04	3.01e-68	11
1303	8.41e-73	CCDC88C	-0.354439	0.027	0.131	3.04e-68	11
1304	2.96e-72	HSPA8	-0.484613	0.691	0.688	1.07e-67	11
1305	4.39e-72	TNFAIP3	-0.914294	0.111	0.229	1.59e-67	11
1306	5.11e-72	SDCBP	-0.615736	0.579	0.595	1.85e-67	11
1307	6.89e-72	RPL21	-0.340253	0.925	0.868	2.50e-67	11
1308	8.33e-72	RTN3	-0.700733	0.612	0.623	3.01e-67	11
1309	1.88e-71	RPL23	-0.384396	0.869	0.834	6.81e-67	11
1310	2.05e-71	TCN1	-0.599665	0.014	0.112	7.43e-67	11
1311	2.22e-71	TRAPPC1	-0.493585	0.43	0.497	8.04e-67	11
1312	2.92e-71	APOBEC3A	-0.584529	0.036	0.143	1.06e-66	11
1313	3.47e-71	CCDC88B	-0.382371	0.023	0.127	1.26e-66	11
1314	5.25e-71	RAB5IF	-0.497248	0.182	0.299	1.90e-66	11
1315	7.29e-71	LINC01001	-0.506739	0.043	0.151	2.64e-66	11
1316	7.74e-71	CLEC4A	-0.378295	0.02	0.12	2.80e-66	11
1317	1.22e-70	MCTP1	-0.356419	0.038	0.146	4.41e-66	11
1318	6.25e-70	APOBR	-0.347473	0.011	0.105	2.26e-65	11
1319	1.30e-69	MOB3A	-0.495163	0.112	0.231	4.69e-65	11
1320	1.61e-69	LRMP	-0.375329	0.015	0.111	5.81e-65	11
1321	1.94e-69	VSTM1	-0.342179	0.013	0.109	7.01e-65	11
1322	2.29e-69	DEF6	-0.346505	0.017	0.114	8.29e-65	11
1323	3.51e-69	HACD4	-0.410375	0.082	0.198	1.27e-64	11
1324	4.71e-69	NAMPT	-1.28483	0.383	0.457	1.71e-64	11
1325	1.68e-68	LMNB1	-0.385543	0.026	0.125	6.08e-64	11
1326	2.16e-68	MMP25	-0.491531	0.016	0.111	7.80e-64	11
1327	4.30e-68	MFNG	-0.253683	0.014	0.107	1.55e-63	11
1328	5.04e-68	ITGA4	-0.473133	0.046	0.152	1.82e-63	11
1329	6.32e-68	RUNX3	-0.519946	0.019	0.114	2.29e-63	11
1330	7.11e-68	RAB3D	-0.462506	0.069	0.179	2.57e-63	11
1331	8.06e-68	BTK	-0.263826	0.013	0.105	2.92e-63	11
1332	9.84e-68	HSPA1B	-0.93991	0.686	0.665	3.56e-63	11
1333	1.17e-67	MALAT1	1.12182	0.931	0.986	4.24e-63	11
1334	1.29e-67	FOSB	0.460076	0.528	0.383	4.68e-63	11
1335	1.34e-67	GLT1D1	-0.39197	0.012	0.104	4.84e-63	11
1336	1.49e-67	RGL4	-0.394625	0.011	0.102	5.41e-63	11
1337	2.87e-67	MRPS6	0.257654	0.224	0.123	1.04e-62	11
1338	6.25e-67	CCNI	-0.288943	0.775	0.765	2.26e-62	11
1339	1.70e-66	NRGN	-0.262031	0.017	0.11	6.15e-62	11
1340	2.26e-66	HHEX	-0.266553	0.013	0.104	8.17e-62	11
1341	5.96e-66	SNHG29	-0.652838	0.404	0.481	2.16e-61	11
1342	1.38e-65	MGAT4A	-0.374872	0.048	0.152	5.00e-61	11
1343	1.67e-65	MGAM	-0.460951	0.012	0.102	6.04e-61	11
1344	2.06e-65	CDC42SE2	-0.470399	0.114	0.227	7.44e-61	11
1345	3.57e-65	IRF8	-0.349953	0.013	0.103	1.29e-60	11
1346	3.73e-65	FNBP1	-0.49294	0.203	0.315	1.35e-60	11
1347	3.80e-65	PSTPIP2	-0.393676	0.034	0.134	1.38e-60	11
1348	6.59e-65	RNASE6	-0.350574	0.026	0.122	2.38e-60	11
1349	8.54e-65	CD84	-0.437988	0.024	0.118	3.09e-60	11
1350	9.11e-65	C16orf54	-0.338763	0.012	0.101	3.30e-60	11
1351	9.12e-65	CD86	-0.292175	0.013	0.102	3.30e-60	11
1352	9.47e-65	IL10RA	-0.302666	0.014	0.103	3.43e-60	11
1353	1.03e-64	AOAH	-0.319606	0.014	0.104	3.73e-60	11
1354	1.42e-64	RBM47	-0.396109	0.037	0.137	5.13e-60	11
1355	2.14e-64	RNF149	-0.728911	0.248	0.346	7.73e-60	11
1356	2.39e-64	RPL36A	-0.460683	0.729	0.676	8.66e-60	11
1357	3.36e-64	DUSP6	-0.704834	0.18	0.29	1.22e-59	11
1358	4.55e-64	VSIR	-0.645334	0.306	0.388	1.65e-59	11
1359	5.38e-64	FXYD5	-0.433894	0.334	0.425	1.95e-59	11
1360	8.26e-64	IMPDH1	-0.374626	0.07	0.178	2.99e-59	11
1361	1.28e-63	ATP6V0D1	-0.504458	0.327	0.412	4.64e-59	11
1362	1.59e-63	SYTL1	-0.325707	0.016	0.106	5.75e-59	11
1363	3.71e-63	ST6GAL1	-0.315882	0.034	0.131	1.34e-58	11
1364	7.91e-63	SEMA4D	-0.475896	0.061	0.164	2.86e-58	11
1365	8.12e-63	FPR2	-0.430905	0.014	0.101	2.94e-58	11
1366	2.71e-62	GPR65	-0.368835	0.016	0.103	9.82e-58	11
1367	2.77e-62	AQP9	-0.597163	0.021	0.111	1.00e-57	11
1368	3.84e-62	TBXAS1	-0.276143	0.014	0.101	1.39e-57	11
1369	4.82e-62	KLF6	-0.438688	0.668	0.687	1.74e-57	11
1370	1.49e-61	STAB1	-0.375141	0.034	0.128	5.41e-57	11
1371	1.67e-61	GYG1	-0.596318	0.192	0.296	6.06e-57	11
1372	1.89e-61	CASP1	-0.42112	0.075	0.179	6.86e-57	11
1373	2.20e-61	CYTH4	-0.334105	0.015	0.101	7.97e-57	11
1374	3.96e-61	MYD88	-0.456429	0.109	0.216	1.43e-56	11
1375	4.84e-61	TSPAN2	-0.402225	0.037	0.131	1.75e-56	11
1376	5.56e-61	ESAM	-0.402418	0.031	0.125	2.01e-56	11
1377	6.52e-61	PTP4A2	-0.398115	0.585	0.611	2.36e-56	11
1378	8.55e-61	NPL	-0.380281	0.025	0.116	3.10e-56	11
1379	1.28e-60	PYCARD	-0.363513	0.093	0.202	4.64e-56	11
1380	1.33e-60	PCED1B-AS1	-0.425477	0.022	0.11	4.80e-56	11
1381	2.86e-60	MPP1	-0.403421	0.086	0.19	1.03e-55	11
1382	3.54e-60	DNM2	-0.399991	0.12	0.23	1.28e-55	11
1383	1.09e-59	RBP7	-0.40081	0.019	0.105	3.96e-55	11
1384	1.30e-59	KDM6B	-0.608798	0.185	0.287	4.70e-55	11
1385	2.32e-59	RIN3	-0.275993	0.019	0.106	8.39e-55	11
1386	2.47e-59	CARD8	-0.429894	0.11	0.216	8.93e-55	11
1387	5.60e-59	TACC3	-0.288696	0.017	0.101	2.03e-54	11
1388	6.18e-59	RILPL2	-0.490367	0.153	0.258	2.24e-54	11
1389	1.34e-58	LTB4R	-0.336221	0.018	0.104	4.84e-54	11
1390	1.35e-58	TINAGL1	-0.432543	0.032	0.123	4.87e-54	11
1391	1.65e-58	PARP8	-0.456114	0.067	0.166	5.97e-54	11
1392	2.07e-58	FAM107B	-0.589815	0.305	0.39	7.51e-54	11
1393	4.24e-58	LPAR2	-0.408581	0.025	0.113	1.53e-53	11
1394	7.18e-58	IL1R2	-0.715361	0.034	0.124	2.60e-53	11
1395	7.52e-58	CYBA	-0.552794	0.332	0.414	2.72e-53	11
1396	2.51e-57	IMPA2	-0.358773	0.063	0.161	9.09e-53	11
1397	2.58e-57	MSRA	-0.367743	0.062	0.16	9.35e-53	11
1398	3.49e-57	SH2D3C	-0.297412	0.028	0.116	1.26e-52	11
1399	9.04e-57	PSD4	-0.323	0.023	0.108	3.27e-52	11
1400	1.37e-56	ENO1	-0.454041	0.629	0.597	4.96e-52	11
1401	2.49e-56	WDR1	-0.468652	0.327	0.4	9.02e-52	11
1402	3.00e-56	GPAT3	-0.360297	0.023	0.107	1.09e-51	11
1403	3.37e-56	CASP10	-0.267885	0.02	0.102	1.22e-51	11
1404	4.41e-56	PPP1CA	-0.376958	0.173	0.279	1.60e-51	11
1405	6.48e-56	RPS15A	-0.320714	0.902	0.847	2.35e-51	11
1406	6.81e-56	PTPN18	-0.434693	0.186	0.286	2.47e-51	11
1407	8.58e-56	NLRC5	-0.361349	0.046	0.137	3.11e-51	11
1408	1.24e-55	PLVAP	-0.864575	0.05	0.144	4.49e-51	11
1409	1.98e-55	LSP1	-0.683543	0.525	0.539	7.15e-51	11
1410	5.52e-55	SLC6A6	-0.438932	0.073	0.169	2.00e-50	11
1411	5.70e-55	CLEC7A	-0.411458	0.026	0.11	2.06e-50	11
1412	1.01e-54	HK2	-0.346167	0.047	0.14	3.64e-50	11
1413	2.72e-54	CD36	-0.57449	0.079	0.181	9.83e-50	11
1414	1.14e-53	CITED4	-0.47037	0.059	0.15	4.12e-49	11
1415	1.14e-53	IER3	-0.485836	0.241	0.351	4.13e-49	11
1416	1.20e-53	SLC5A3	0.38567	0.136	0.068	4.35e-49	11
1417	1.98e-53	IRS2	-0.790399	0.195	0.287	7.16e-49	11
1418	2.88e-53	HLA-F	-0.5221	0.213	0.302	1.04e-48	11
1419	3.29e-53	ORAI2	-0.459038	0.126	0.225	1.19e-48	11
1420	4.72e-53	B4GALT5	-0.580649	0.213	0.305	1.71e-48	11
1421	8.88e-53	RBM38	-0.296754	0.022	0.102	3.22e-48	11
1422	9.42e-53	ST8SIA4	-0.311491	0.044	0.133	3.41e-48	11
1423	1.45e-52	CFLAR	-0.540794	0.415	0.47	5.25e-48	11
1424	2.33e-52	SERF2	0.321645	0.868	0.752	8.43e-48	11
1425	5.29e-52	PRDM1	-0.452908	0.031	0.112	1.91e-47	11
1426	8.34e-52	RPL38	-0.330689	0.844	0.778	3.02e-47	11
1427	9.83e-52	RNASEK	-0.468656	0.289	0.366	3.56e-47	11
1428	2.92e-51	ARHGAP26	-0.379846	0.069	0.162	1.06e-46	11
1429	3.10e-51	CMTM7	-0.410605	0.103	0.196	1.12e-46	11
1430	3.28e-51	RPL34	-0.342683	0.964	0.91	1.19e-46	11
1431	3.68e-51	HSPH1	-0.8845	0.355	0.424	1.33e-46	11
1432	4.75e-51	HMGN2	-0.669431	0.701	0.672	1.72e-46	11
1433	5.55e-51	MS4A7	-0.529812	0.03	0.11	2.01e-46	11
1434	6.26e-51	TRBC2	-0.96135	0.039	0.121	2.27e-46	11
1435	1.77e-50	AP1G2	-0.342332	0.049	0.134	6.40e-46	11
1436	1.89e-50	RPS17	-0.457607	0.71	0.674	6.83e-46	11
1437	3.07e-50	JARID2	-0.401165	0.099	0.193	1.11e-45	11
1438	3.37e-50	TMEM170B	-0.360733	0.036	0.117	1.22e-45	11
1439	5.39e-50	ALDH1A1	0.255294	0.137	0.069	1.95e-45	11
1440	8.96e-50	ARHGAP27	-0.263249	0.025	0.103	3.24e-45	11
1441	1.25e-49	RGCC	0.291557	0.449	0.319	4.54e-45	11
1442	2.58e-49	ASAP1	-0.452029	0.207	0.299	9.35e-45	11
1443	3.27e-49	GNB1	-0.349701	0.585	0.589	1.18e-44	11
1444	5.17e-49	OLR1	-0.605283	0.043	0.126	1.87e-44	11
1445	6.87e-49	EEF1G	-0.511802	0.466	0.506	2.49e-44	11
1446	1.00e-48	G6PD	-0.477671	0.121	0.214	3.64e-44	11
1447	2.12e-47	PHACTR1	-0.460104	0.038	0.117	7.68e-43	11
1448	2.37e-47	HMGN1	-0.468445	0.425	0.466	8.59e-43	11
1449	2.68e-47	CELF2	-0.487163	0.307	0.389	9.69e-43	11
1450	2.80e-47	TPI1	-0.382538	0.591	0.567	1.02e-42	11
1451	6.55e-47	DBNL	-0.436339	0.222	0.307	2.37e-42	11
1452	1.12e-46	RNF166	-0.313618	0.053	0.137	4.04e-42	11
1453	2.22e-46	RPS14	-0.293835	0.908	0.843	8.04e-42	11
1454	6.03e-46	ACSL1	-0.578281	0.114	0.202	2.18e-41	11
1455	1.17e-45	GADD45G	0.360728	0.135	0.07	4.22e-41	11
1456	2.18e-45	PSMB8-AS1	-0.278436	0.041	0.118	7.89e-41	11
1457	2.86e-45	ANKRD44	-0.405463	0.08	0.166	1.04e-40	11
1458	6.15e-45	TSPO	-0.469596	0.539	0.564	2.23e-40	11
1459	1.02e-44	TSTD1	-0.291608	0.03	0.103	3.70e-40	11
1460	1.09e-44	HLA-DPA1	-1.25508	0.239	0.31	3.93e-40	11
1461	1.14e-44	STMN1	-0.455383	0.096	0.184	4.12e-40	11
1462	1.73e-44	DNAJC5	-0.374779	0.102	0.188	6.27e-40	11
1463	2.20e-44	TNFSF13B	-0.429541	0.089	0.174	7.95e-40	11
1464	3.06e-44	GLRX	-0.46091	0.24	0.32	1.11e-39	11
1465	3.38e-44	CKS2	-0.319087	0.058	0.137	1.22e-39	11
1466	7.78e-44	USP10	-0.657243	0.219	0.296	2.82e-39	11
1467	8.15e-44	C20orf27	-0.347313	0.085	0.17	2.95e-39	11
1468	9.82e-44	S100A6	0.343463	0.918	0.82	3.55e-39	11
1469	1.61e-43	CSK	-0.403216	0.158	0.243	5.85e-39	11
1470	2.10e-43	DIAPH1	-0.47417	0.307	0.373	7.59e-39	11
1471	3.34e-43	PNPLA2	-0.490039	0.44	0.484	1.21e-38	11
1472	4.93e-43	HIST2H2BE	-0.468084	0.033	0.104	1.79e-38	11
1473	5.10e-43	IER2	-0.522379	0.432	0.488	1.84e-38	11
1474	8.89e-43	JAK3	-0.2833	0.036	0.109	3.22e-38	11
1475	1.27e-42	MCL1	-0.556304	0.58	0.599	4.59e-38	11
1476	1.35e-42	TBC1D1	-0.332983	0.113	0.199	4.89e-38	11
1477	2.03e-42	ADGRF5	-0.315769	0.031	0.101	7.36e-38	11
1478	3.18e-42	TMEM71	-0.406397	0.055	0.131	1.15e-37	11
1479	3.22e-42	JPT1	-0.339443	0.128	0.216	1.17e-37	11
1480	4.17e-42	EIF4A1	-0.411295	0.469	0.489	1.51e-37	11
1481	4.45e-42	MTRNR2L12	-0.515682	0.39	0.443	1.61e-37	11
1482	5.72e-42	DENND4B	-0.303828	0.067	0.147	2.07e-37	11
1483	7.52e-42	MAP2K3	-0.415652	0.165	0.25	2.72e-37	11
1484	7.92e-42	EPB41	-0.343584	0.055	0.132	2.87e-37	11
1485	1.05e-41	EMCN	-0.382556	0.041	0.114	3.79e-37	11
1486	1.35e-41	ERG	-0.258911	0.035	0.106	4.89e-37	11
1487	1.51e-41	FES	-0.300369	0.066	0.145	5.46e-37	11
1488	1.52e-41	DUSP2	-0.592156	0.032	0.101	5.51e-37	11
1489	6.12e-41	NAP1L1	-0.465573	0.649	0.609	2.21e-36	11
1490	9.31e-41	ARID1A	-0.42481	0.287	0.358	3.37e-36	11
1491	9.37e-41	PRKCH	-0.328949	0.048	0.121	3.39e-36	11
1492	1.23e-40	CLEC2B	-0.351226	0.115	0.201	4.44e-36	11
1493	2.07e-40	RPS21	-0.380223	0.806	0.712	7.49e-36	11
1494	2.97e-40	RPS6	-0.386121	0.933	0.847	1.07e-35	11
1495	3.61e-40	NUP50	-0.46179	0.186	0.265	1.31e-35	11
1496	5.06e-40	LPXN	-0.271422	0.043	0.114	1.83e-35	11
1497	6.30e-40	AP5B1	-0.401455	0.058	0.133	2.28e-35	11
1498	9.57e-40	LGMN	-0.302317	0.22	0.13	3.46e-35	11
1499	2.51e-39	PCBP2	-0.268316	0.703	0.666	9.10e-35	11
1500	2.61e-39	SLC38A1	-0.440261	0.067	0.143	9.46e-35	11
1501	2.67e-39	DENND3	-0.372295	0.065	0.14	9.67e-35	11
1502	3.46e-39	CXCL8	-1.45092	0.09	0.166	1.25e-34	11
1503	3.53e-39	TAGLN2	-0.466843	0.686	0.636	1.28e-34	11
1504	4.14e-39	HLA-DRA	-1.69411	0.355	0.389	1.50e-34	11
1505	4.39e-39	TLR2	-0.399227	0.055	0.127	1.59e-34	11
1506	1.46e-38	NIBAN1	-0.583711	0.145	0.227	5.27e-34	11
1507	1.59e-38	FOXN2	-0.286829	0.079	0.156	5.74e-34	11
1508	2.41e-38	AGO4	-0.36079	0.086	0.163	8.72e-34	11
1509	3.24e-38	RAB7A	-0.364438	0.619	0.6	1.17e-33	11
1510	3.30e-38	STK38	-0.428433	0.187	0.265	1.19e-33	11
1511	3.58e-38	SP110	-0.548275	0.233	0.304	1.29e-33	11
1512	4.55e-38	ATP6V1B2	-0.551318	0.286	0.341	1.65e-33	11
1513	4.69e-38	BCAM	-0.318439	0.041	0.109	1.70e-33	11
1514	5.96e-38	CIDEB	-0.274483	0.049	0.119	2.16e-33	11
1515	7.21e-38	ABTB1	-0.487686	0.123	0.201	2.61e-33	11
1516	1.68e-37	TLN1	-0.368089	0.656	0.617	6.08e-33	11
1517	1.83e-37	ADGRL4	-0.396246	0.041	0.107	6.63e-33	11
1518	2.32e-37	GPI	-0.527455	0.403	0.433	8.41e-33	11
1519	2.64e-37	PAK2	-0.447569	0.43	0.462	9.55e-33	11
1520	4.96e-37	CDH5	-0.341546	0.036	0.101	1.79e-32	11
1521	9.95e-37	RPS20	-0.436366	0.871	0.788	3.60e-32	11
1522	1.11e-36	GPCPD1	-0.440887	0.209	0.282	4.02e-32	11
1523	1.18e-36	ACKR1	-0.849973	0.053	0.123	4.26e-32	11
1524	1.65e-36	RPS13	-0.253835	0.924	0.829	5.99e-32	11
1525	2.42e-36	IFI30	-1.00002	0.182	0.245	8.76e-32	11
1526	2.64e-36	TRAC	-0.665086	0.041	0.106	9.54e-32	11
1527	2.82e-36	HVCN1	-0.283131	0.042	0.108	1.02e-31	11
1528	3.42e-36	PELI1	-0.373	0.072	0.143	1.24e-31	11
1529	5.25e-36	MCAM	-0.456413	0.051	0.119	1.90e-31	11
1530	7.14e-36	PPP4C	-0.360902	0.236	0.307	2.59e-31	11
1531	1.00e-35	ETS2	-0.405477	0.15	0.228	3.63e-31	11
1532	1.15e-35	ETV6	-0.298638	0.118	0.195	4.16e-31	11
1533	1.84e-35	MLKL	-0.287679	0.069	0.139	6.65e-31	11
1534	2.17e-35	NCOA4	-0.482061	0.397	0.428	7.87e-31	11
1535	7.93e-35	PTGS2	-0.897844	0.07	0.138	2.87e-30	11
1536	1.10e-34	MAP3K1	-0.355372	0.099	0.172	3.97e-30	11
1537	1.24e-34	CPPED1	-0.464826	0.141	0.214	4.50e-30	11
1538	1.32e-34	ATP5MC2	-0.306518	0.665	0.603	4.79e-30	11
1539	2.46e-34	EEF1A1	-0.252626	0.983	0.921	8.89e-30	11
1540	3.15e-34	CRLF3	-0.302243	0.076	0.147	1.14e-29	11
1541	3.95e-34	RNF44	-0.356063	0.105	0.177	1.43e-29	11
1542	4.17e-34	G0S2	-1.48887	0.171	0.236	1.51e-29	11
1543	4.27e-34	RALGAPA2	-0.277127	0.074	0.145	1.55e-29	11
1544	4.70e-34	ZNF281	-0.448774	0.144	0.217	1.70e-29	11
1545	5.03e-34	ARF6	-0.399527	0.379	0.415	1.82e-29	11
1546	7.23e-34	SEPTIN6	-0.387843	0.113	0.185	2.62e-29	11
1547	8.12e-34	VWF	-0.580501	0.06	0.128	2.94e-29	11
1548	8.13e-34	CBL	-0.350849	0.102	0.174	2.94e-29	11
1549	2.03e-33	SLC15A3	-0.276509	0.059	0.125	7.35e-29	11
1550	2.93e-33	HLA-DRB1	-1.36068	0.389	0.411	1.06e-28	11
1551	3.73e-33	PFKFB3	-0.436077	0.125	0.195	1.35e-28	11
1552	4.67e-33	TYK2	-0.3945	0.174	0.244	1.69e-28	11
1553	5.33e-33	SIPA1	-0.270557	0.067	0.135	1.93e-28	11
1554	7.46e-33	BRD2	-0.386072	0.454	0.48	2.70e-28	11
1555	8.92e-33	UBALD2	-0.358877	0.133	0.205	3.23e-28	11
1556	9.63e-33	RPS16	-0.304878	0.878	0.763	3.48e-28	11
1557	1.14e-32	MARCKSL1	-0.333126	0.119	0.194	4.14e-28	11
1558	1.53e-32	TNK2	-0.256998	0.053	0.117	5.53e-28	11
1559	1.59e-32	XPO6	-0.503683	0.14	0.21	5.75e-28	11
1560	1.63e-32	COL15A1	-0.359241	0.343	0.223	5.89e-28	11
1561	3.13e-32	ORAI1	-0.25297	0.08	0.148	1.13e-27	11
1562	5.44e-32	AL627171.2	-0.288986	0.04	0.101	1.97e-27	11
1563	6.44e-32	NOP10	-0.349858	0.385	0.424	2.33e-27	11
1564	1.27e-31	IRF1	-0.493571	0.21	0.28	4.59e-27	11
1565	1.44e-31	CBX4	-0.364263	0.12	0.19	5.21e-27	11
1566	2.10e-31	TRABD	-0.250518	0.089	0.16	7.58e-27	11
1567	5.33e-31	DGKA	-0.420934	0.134	0.202	1.93e-26	11
1568	7.31e-31	ATP5MG	-0.269172	0.598	0.574	2.64e-26	11
1569	7.35e-31	SSH2	-0.412137	0.16	0.228	2.66e-26	11
1570	9.65e-31	TAP1	-0.422418	0.181	0.247	3.49e-26	11
1571	1.57e-30	NABP1	-0.358587	0.089	0.157	5.67e-26	11
1572	1.62e-30	PLBD1	-0.819095	0.304	0.337	5.85e-26	11
1573	1.91e-30	SVIP	-0.373283	0.113	0.18	6.90e-26	11
1574	1.96e-30	UPP1	-0.253631	0.062	0.125	7.10e-26	11
1575	2.15e-30	IL4R	-0.329426	0.115	0.184	7.79e-26	11
1576	2.60e-30	LPGAT1	-0.438953	0.223	0.284	9.43e-26	11
1577	2.72e-30	USP3	-0.324305	0.13	0.2	9.86e-26	11
1578	1.16e-29	CCDC69	-0.282373	0.088	0.153	4.20e-25	11
1579	1.21e-29	AZU1	-1.89853	0.068	0.127	4.39e-25	11
1580	1.25e-29	MYO9B	-0.329029	0.133	0.201	4.54e-25	11
1581	1.26e-29	MICAL1	-0.287981	0.084	0.149	4.55e-25	11
1582	1.35e-29	CD24	-0.971726	0.155	0.216	4.88e-25	11
1583	1.70e-29	MARK2	-0.400398	0.146	0.212	6.17e-25	11
1584	2.34e-29	DGKZ	-0.295529	0.106	0.173	8.47e-25	11
1585	2.83e-29	HLA-DMA	-0.466983	0.125	0.188	1.03e-24	11
1586	3.69e-29	PTDSS1	-0.312257	0.159	0.225	1.33e-24	11
1587	4.88e-29	PDLIM7	-0.401117	0.265	0.321	1.77e-24	11
1588	7.42e-29	PPP1R14B	0.266327	0.301	0.22	2.69e-24	11
1589	7.88e-29	MMRN2	-0.319799	0.046	0.102	2.85e-24	11
1590	7.96e-29	MAPKAPK3	-0.254304	0.069	0.129	2.88e-24	11
1591	1.27e-28	CCDC125	-0.320684	0.053	0.111	4.61e-24	11
1592	1.33e-28	RPS19	-0.401351	0.865	0.743	4.80e-24	11
1593	1.40e-28	CD14	-0.608052	0.098	0.159	5.07e-24	11
1594	1.42e-28	H19	-0.510593	0.049	0.11	5.15e-24	11
1595	3.06e-28	MAPK14	-0.519241	0.277	0.321	1.11e-23	11
1596	3.21e-28	EIF4E3	-0.376053	0.115	0.178	1.16e-23	11
1597	4.46e-28	ERO1A	-0.339141	0.156	0.222	1.61e-23	11
1598	5.08e-28	TRIR	-0.28739	0.588	0.567	1.84e-23	11
1599	6.23e-28	HDAC1	-0.276054	0.135	0.202	2.25e-23	11
1600	6.85e-28	WIPF1	-0.486557	0.33	0.367	2.48e-23	11
1601	7.62e-28	H2AFZ	-0.394308	0.389	0.42	2.76e-23	11
1602	8.31e-28	GNG10	-0.449193	0.223	0.277	3.01e-23	11
1603	1.45e-27	CNPY3	-0.339832	0.177	0.239	5.25e-23	11
1604	1.81e-27	MT-CO1	-0.368841	0.977	0.964	6.55e-23	11
1605	1.92e-27	CD3E	-0.670155	0.051	0.104	6.94e-23	11
1606	2.12e-27	PPP1R12A	-0.418299	0.444	0.462	7.66e-23	11
1607	2.59e-27	SNHG5	-0.422932	0.336	0.377	9.36e-23	11
1608	4.86e-27	SLC25A5	-0.347348	0.363	0.391	1.76e-22	11
1609	1.03e-26	CS	-0.358067	0.228	0.282	3.73e-22	11
1610	1.16e-26	NMI	-0.290922	0.122	0.186	4.20e-22	11
1611	1.38e-26	UBN1	-0.39694	0.181	0.242	5.01e-22	11
1612	1.45e-26	GRAMD1A	-0.297445	0.107	0.169	5.25e-22	11
1613	2.37e-26	S1PR1	-0.286804	0.058	0.114	8.56e-22	11
1614	3.94e-26	AL136454.1	-0.465006	0.333	0.367	1.42e-21	11
1615	4.76e-26	APAF1	-0.371727	0.104	0.163	1.72e-21	11
1616	4.86e-26	TFRC	-0.477521	0.09	0.15	1.76e-21	11
1617	6.33e-26	YPEL5	-0.539937	0.379	0.401	2.29e-21	11
1618	9.27e-26	BID	-0.272762	0.085	0.144	3.36e-21	11
1619	1.28e-25	DNAJA4	-0.310099	0.067	0.123	4.62e-21	11
1620	2.57e-25	SUSD6	-0.315216	0.139	0.201	9.29e-21	11
1621	2.85e-25	CYB5R4	-0.25092	0.055	0.109	1.03e-20	11
1622	3.86e-25	MX2	-0.298093	0.076	0.134	1.40e-20	11
1623	4.18e-25	EEF1B2	-0.363826	0.708	0.629	1.51e-20	11
1624	4.52e-25	S100A11	-0.353408	0.869	0.782	1.64e-20	11
1625	6.68e-25	GSR	-0.283401	0.14	0.201	2.42e-20	11
1626	9.84e-25	RPL4	-0.337036	0.755	0.677	3.56e-20	11
1627	1.41e-24	EHD1	-0.33057	0.109	0.167	5.11e-20	11
1628	1.47e-24	MIS18BP1	-0.303898	0.141	0.203	5.31e-20	11
1629	2.27e-24	SLC12A6	-0.34882	0.123	0.18	8.21e-20	11
1630	3.63e-24	ALAS1	-0.300142	0.075	0.13	1.31e-19	11
1631	5.60e-24	GNAQ	-0.390577	0.308	0.346	2.03e-19	11
1632	6.89e-24	LAMTOR4	-0.360655	0.432	0.448	2.49e-19	11
1633	8.01e-24	RAB4B	-0.27531	0.094	0.149	2.90e-19	11
1634	8.98e-24	HNRNPC	-0.298504	0.662	0.622	3.25e-19	11
1635	1.36e-23	E2F3	-0.268738	0.075	0.129	4.92e-19	11
1636	4.11e-23	DUSP23	-0.252933	0.111	0.169	1.49e-18	11
1637	4.70e-23	PTMA	-0.280182	0.942	0.804	1.70e-18	11
1638	5.27e-23	MBD6	-0.367151	0.171	0.225	1.91e-18	11
1639	7.79e-23	C9orf72	-0.255783	0.055	0.105	2.82e-18	11
1640	9.80e-23	PICALM	-0.381811	0.407	0.421	3.55e-18	11
1641	1.37e-22	DDX60L	-0.304997	0.074	0.127	4.97e-18	11
1642	1.75e-22	ANKRD13A	-0.29787	0.115	0.172	6.35e-18	11
1643	2.46e-22	ADAM19	-0.26023	0.054	0.103	8.90e-18	11
1644	3.55e-22	TSC22D4	-0.331236	0.128	0.183	1.29e-17	11
1645	5.06e-22	PSMB9	-0.294539	0.176	0.229	1.83e-17	11
1646	5.26e-22	CASP8	-0.299501	0.099	0.152	1.90e-17	11
1647	5.80e-22	GYS1	-0.283859	0.087	0.14	2.10e-17	11
1648	7.74e-22	IL16	-0.296077	0.096	0.149	2.80e-17	11
1649	9.71e-22	CTSD	-0.517662	0.462	0.454	3.51e-17	11
1650	1.15e-21	KPNB1	-0.367832	0.497	0.483	4.15e-17	11
1651	2.23e-21	NIN	-0.374546	0.206	0.256	8.06e-17	11
1652	3.98e-21	KIAA0319L	-0.367528	0.155	0.206	1.44e-16	11
1653	4.14e-21	TNIP1	-0.275505	0.132	0.186	1.50e-16	11
1654	6.30e-21	WBP2	-0.415971	0.308	0.338	2.28e-16	11
1655	1.12e-20	CNOT6L	-0.395092	0.174	0.224	4.04e-16	11
1656	1.53e-20	COLGALT1	-0.277088	0.221	0.267	5.55e-16	11
1657	2.18e-20	DDX39B	-0.314365	0.439	0.448	7.90e-16	11
1658	4.06e-20	MAX	-0.342732	0.271	0.309	1.47e-15	11
1659	7.24e-20	SMCHD1	-0.569063	0.293	0.323	2.62e-15	11
1660	7.53e-20	CERT1	-0.37436	0.187	0.234	2.72e-15	11
1661	9.11e-20	SQOR	-0.26133	0.129	0.18	3.30e-15	11
1662	1.20e-19	NXF1	-0.289746	0.154	0.205	4.35e-15	11
1663	1.84e-19	TLR4	-0.415169	0.133	0.181	6.67e-15	11
1664	1.96e-19	CLEC2D	-0.320143	0.061	0.106	7.08e-15	11
1665	2.21e-19	MPO	-1.71783	0.087	0.132	7.99e-15	11
1666	5.19e-19	OSTF1	-0.334127	0.208	0.25	1.88e-14	11
1667	5.30e-19	C17orf49	-0.304501	0.209	0.252	1.92e-14	11
1668	6.01e-19	RPS27A	-0.252269	0.928	0.841	2.17e-14	11
1669	9.28e-19	ROCK1	-0.385275	0.459	0.452	3.36e-14	11
1670	9.86e-19	SULT1A1	-0.344227	0.12	0.167	3.57e-14	11
1671	9.99e-19	IRAK3	-0.351638	0.159	0.206	3.62e-14	11
1672	1.01e-18	POSTN	-0.270967	0.078	0.13	3.67e-14	11
1673	2.23e-18	RPS3	-0.331191	0.864	0.757	8.06e-14	11
1674	2.58e-18	MSL3	-0.250617	0.117	0.166	9.34e-14	11
1675	3.59e-18	TAPBP	-0.312212	0.388	0.402	1.30e-13	11
1676	3.65e-18	METTL9	-0.354181	0.307	0.334	1.32e-13	11
1677	4.07e-18	CCL14	-0.82309	0.073	0.118	1.47e-13	11
1678	4.72e-18	BOD1L1	-0.477453	0.421	0.428	1.71e-13	11
1679	4.87e-18	MAPKAPK2	-0.325116	0.209	0.251	1.76e-13	11
1680	5.13e-18	WNK1	-0.369309	0.397	0.408	1.86e-13	11
1681	5.18e-18	LASP1	-0.387982	0.409	0.411	1.87e-13	11
1682	5.66e-18	CNTRL	-0.294731	0.114	0.162	2.05e-13	11
1683	7.04e-18	RCOR1	-0.357711	0.147	0.192	2.55e-13	11
1684	8.92e-18	BIRC3	-0.430612	0.064	0.107	3.23e-13	11
1685	1.36e-17	RPS26	-0.44427	0.715	0.623	4.94e-13	11
1686	1.89e-17	SAT1	-0.75187	0.626	0.59	6.83e-13	11
1687	2.76e-17	ME2	-0.29781	0.157	0.202	1.00e-12	11
1688	4.90e-17	REL	-0.304411	0.113	0.159	1.77e-12	11
1689	6.43e-17	RPLP2	-0.25052	0.892	0.796	2.33e-12	11
1690	1.62e-16	ZFAS1	-0.287667	0.523	0.502	5.85e-12	11
1691	2.29e-16	TXN	-0.286778	0.598	0.562	8.28e-12	11
1692	2.76e-16	TSPAN14	-0.30295	0.245	0.279	9.98e-12	11
1693	3.61e-16	MBP	-0.404475	0.199	0.239	1.31e-11	11
1694	5.93e-16	GIT2	-0.326906	0.194	0.233	2.15e-11	11
1695	6.84e-16	HLA-DQA1	-0.964001	0.094	0.133	2.48e-11	11
1696	9.57e-16	PLSCR1	-0.3298	0.32	0.343	3.46e-11	11
1697	9.75e-16	HIPK1	-0.306466	0.218	0.257	3.53e-11	11
1698	1.11e-15	TGFB1	-0.275347	0.151	0.195	4.02e-11	11
1699	1.21e-15	CTSB	-0.650757	0.657	0.486	4.38e-11	11
1700	1.26e-15	FLOT1	-0.350695	0.366	0.374	4.55e-11	11
1701	1.29e-15	TAOK3	-0.373134	0.3	0.324	4.67e-11	11
1702	1.53e-15	TPP1	-0.449331	0.473	0.45	5.55e-11	11
1703	1.55e-15	HDGF	-0.383121	0.45	0.434	5.61e-11	11
1704	1.85e-15	ICAM1	-0.350833	0.08	0.121	6.68e-11	11
1705	1.93e-15	FURIN	-0.253986	0.179	0.221	7.00e-11	11
1706	3.22e-15	SEPTIN9	-0.344201	0.267	0.296	1.16e-10	11
1707	4.47e-15	EIF4B	-0.293367	0.583	0.547	1.62e-10	11
1708	6.29e-15	MID1IP1	-0.360858	0.172	0.215	2.28e-10	11
1709	8.03e-15	TET2	-0.283325	0.133	0.175	2.91e-10	11
1710	8.67e-15	PPP1R15A	-0.327728	0.408	0.423	3.14e-10	11
1711	1.02e-14	EP300	-0.372527	0.333	0.348	3.69e-10	11
1712	1.61e-14	MIDN	-0.309095	0.265	0.296	5.84e-10	11
1713	1.68e-14	KIAA0513	-0.261351	0.082	0.12	6.09e-10	11
1714	1.90e-14	SRPK1	-0.287345	0.106	0.147	6.88e-10	11
1715	2.99e-14	MTF1	-0.269321	0.105	0.145	1.08e-09	11
1716	3.20e-14	SP100	-0.348482	0.397	0.402	1.16e-09	11
1717	3.54e-14	MAPRE1	-0.300125	0.283	0.307	1.28e-09	11
1718	4.00e-14	SNRK	-0.254429	0.113	0.152	1.45e-09	11
1719	4.41e-14	PIM3	-0.322051	0.162	0.199	1.60e-09	11
1720	6.43e-14	RALB	-0.361043	0.226	0.256	2.33e-09	11
1721	8.85e-14	PGAM1	-0.321467	0.447	0.422	3.20e-09	11
1722	1.41e-13	TPST2	-0.291666	0.167	0.202	5.11e-09	11
1723	1.54e-13	UBE2D3	-0.262538	0.597	0.551	5.57e-09	11
1724	1.66e-13	HNRNPA1	-0.290011	0.713	0.62	6.02e-09	11
1725	1.73e-13	UBE2S	-0.276919	0.15	0.189	6.27e-09	11
1726	1.78e-13	ZFAND2A	-0.417003	0.136	0.174	6.43e-09	11
1727	4.38e-13	CYTH1	-0.25899	0.132	0.168	1.58e-08	11
1728	5.63e-13	COX7A2L	-0.310607	0.406	0.402	2.04e-08	11
1729	6.85e-13	RAE1	-0.2565	0.123	0.16	2.48e-08	11
1730	1.02e-12	SPG21	-0.303757	0.276	0.297	3.70e-08	11
1731	1.16e-12	CPEB4	-0.344626	0.185	0.216	4.19e-08	11
1732	1.18e-12	ZBTB7B	-0.262302	0.103	0.139	4.25e-08	11
1733	1.19e-12	RBM23	-0.322768	0.227	0.256	4.30e-08	11
1734	1.22e-12	TFDP1	-0.291754	0.203	0.235	4.43e-08	11
1735	2.38e-12	TREM1	-0.508839	0.104	0.137	8.62e-08	11
1736	2.43e-12	KDM7A	-0.335606	0.156	0.189	8.79e-08	11
1737	2.58e-12	TGFBI	-0.44524	0.194	0.228	9.32e-08	11
1738	3.15e-12	MOB1A	-0.331326	0.436	0.42	1.14e-07	11
1739	3.25e-12	HMOX1	-0.52629	0.087	0.122	1.18e-07	11
1740	3.26e-12	PIP4K2A	-0.345525	0.233	0.259	1.18e-07	11
1741	3.42e-12	RPS27	-0.280024	0.94	0.859	1.24e-07	11
1742	4.44e-12	ITPRID2	-0.257383	0.12	0.155	1.61e-07	11
1743	5.42e-12	PLEKHB2	-0.259406	0.187	0.218	1.96e-07	11
1744	5.90e-12	NUP214	-0.281145	0.152	0.186	2.14e-07	11
1745	6.69e-12	FLNA	-0.290828	0.483	0.455	2.42e-07	11
1746	8.95e-12	C1QB	-0.796755	0.121	0.081	3.24e-07	11
1747	9.45e-12	SPTLC2	-0.306257	0.202	0.23	3.42e-07	11
1748	9.79e-12	FAM120A	-0.288405	0.414	0.407	3.54e-07	11
1749	9.82e-12	MT-ATP8	0.263088	0.613	0.648	3.55e-07	11
1750	1.12e-11	CKAP4	-0.564275	0.513	0.463	4.06e-07	11
1751	1.31e-11	MTPN	-0.304902	0.545	0.498	4.75e-07	11
1752	1.92e-11	DHFR	-0.285007	0.092	0.125	6.94e-07	11
1753	2.20e-11	DEFA3	-2.18429	0.209	0.148	7.96e-07	11
1754	2.84e-11	ITSN2	-0.344969	0.26	0.28	1.03e-06	11
1755	2.89e-11	ATP1B3	-0.348877	0.32	0.333	1.05e-06	11
1756	3.63e-11	A2M	-0.685459	0.208	0.238	1.32e-06	11
1757	4.44e-11	PPP4R1	-0.273158	0.176	0.207	1.61e-06	11
1758	5.09e-11	ASAH1	-0.42085	0.393	0.378	1.84e-06	11
1759	5.38e-11	AGTRAP	-0.298667	0.194	0.222	1.95e-06	11
1760	9.21e-11	WAC	-0.317128	0.463	0.444	3.33e-06	11
1761	1.01e-10	ADSS	-0.316406	0.187	0.216	3.64e-06	11
1762	1.12e-10	HLA-DPB1	-1.05761	0.292	0.293	4.06e-06	11
1763	1.17e-10	TNFSF13	-0.265833	0.112	0.142	4.25e-06	11
1764	1.43e-10	PHC2	-0.326043	0.235	0.259	5.18e-06	11
1765	1.57e-10	AQP1	-0.487744	0.3	0.221	5.68e-06	11
1766	1.80e-10	SERP1	-0.259505	0.519	0.483	6.51e-06	11
1767	2.01e-10	OGFRL1	-0.405071	0.213	0.237	7.27e-06	11
1768	2.64e-10	CDK2AP2	-0.315269	0.217	0.24	9.54e-06	11
1769	2.65e-10	ARHGDIA	-0.269145	0.471	0.439	9.59e-06	11
1770	2.70e-10	SOD2	-0.279202	0.542	0.424	9.77e-06	11
1771	4.90e-10	SYNE2	-0.417105	0.25	0.267	1.77e-05	11
1772	6.32e-10	BAZ2B	-0.367244	0.28	0.294	2.29e-05	11
1773	7.12e-10	SRSF2	-0.300174	0.502	0.462	2.58e-05	11
1774	8.38e-10	JMJD6	-0.26035	0.118	0.148	3.03e-05	11
1775	9.14e-10	TLE5	-0.277093	0.317	0.331	3.31e-05	11
1776	1.01e-09	CAMKK2	-0.315125	0.215	0.237	3.67e-05	11
1777	1.17e-09	HIPK2	-0.269426	0.156	0.185	4.23e-05	11
1778	1.19e-09	BRD4	-0.291676	0.425	0.41	4.31e-05	11
1779	1.45e-09	PRPF38B	-0.35471	0.345	0.345	5.25e-05	11
1780	2.00e-09	CCNL1	-0.271669	0.437	0.429	7.25e-05	11
1781	2.18e-09	DCAF7	-0.266024	0.238	0.258	7.89e-05	11
1782	2.37e-09	THBD	-0.288846	0.105	0.135	8.57e-05	11
1783	2.54e-09	SAMHD1	-0.473801	0.36	0.356	9.21e-05	11
1784	2.70e-09	ATXN2L	-0.280702	0.307	0.314	9.77e-05	11
1785	4.09e-09	USP15	-0.359218	0.263	0.277	1.48e-04	11
1786	5.09e-09	PRPF40A	-0.314173	0.387	0.375	1.84e-04	11
1787	6.63e-09	ZC3H12A	-0.272703	0.114	0.142	2.40e-04	11
1788	8.03e-09	PTEN	-0.316168	0.482	0.454	2.91e-04	11
1789	8.75e-09	RAB5C	-0.27889	0.374	0.365	3.17e-04	11
1790	1.20e-08	STAT5B	-0.364923	0.254	0.265	4.36e-04	11
1791	1.25e-08	GNA13	-0.258454	0.159	0.184	4.51e-04	11
1792	1.41e-08	IVNS1ABP	-0.44367	0.269	0.277	5.09e-04	11
1793	1.83e-08	ADAR	-0.320261	0.397	0.385	6.62e-04	11
1794	1.96e-08	SEC14L1	-0.384038	0.294	0.302	7.10e-04	11
1795	2.03e-08	ARL4C	-0.36308	0.162	0.188	7.36e-04	11
1796	2.56e-08	KMT2D	-0.257033	0.139	0.164	9.26e-04	11
1797	2.84e-08	ABHD5	-0.374458	0.159	0.182	1.03e-03	11
1798	3.21e-08	GAS5	-0.308639	0.26	0.273	1.16e-03	11
1799	4.44e-08	FAR1	-0.305177	0.23	0.246	1.61e-03	11
1800	7.76e-08	AZIN1	-0.304256	0.274	0.283	2.81e-03	11
1801	9.75e-08	LPCAT2	-0.279848	0.188	0.21	3.53e-03	11
1802	1.23e-07	RAP1A	-0.290297	0.359	0.351	4.46e-03	11
1803	1.72e-07	SNHG6	-0.304522	0.254	0.262	6.23e-03	11
1804	1.75e-07	MTMR3	-0.263363	0.141	0.164	6.33e-03	11
1805	2.04e-07	HNRNPUL1	-0.262177	0.546	0.491	7.39e-03	11
1806	2.06e-07	PIAS1	-0.314683	0.292	0.297	7.47e-03	11
1807	2.11e-07	SUB1	-0.250423	0.52	0.468	7.65e-03	11
1808	3.46e-07	IGF2R	-0.255964	0.394	0.302	1.25e-02	11
1809	5.44e-07	NAGK	-0.277899	0.239	0.25	1.97e-02	11
1810	8.12e-07	SATB1	-0.281879	0.136	0.156	2.94e-02	11
1811	9.86e-07	NT5C2	-0.331588	0.211	0.223	3.57e-02	11
1812	1.15e-06	ALDH3B1	-0.302402	0.168	0.184	4.15e-02	11
1813	1.29e-06	APBB1IP	-0.387085	0.316	0.307	4.65e-02	11
1814	1.30e-06	GLIPR2	-0.296836	0.296	0.301	4.69e-02	11
1815	1.60e-06	MKRN1	-0.313941	0.236	0.245	5.78e-02	11
1816	1.70e-06	H2AFV	-0.310254	0.403	0.38	6.16e-02	11
1817	1.86e-06	IL10RB	-0.2674	0.168	0.185	6.75e-02	11
1818	1.99e-06	LRRK2	-0.483318	0.174	0.186	7.21e-02	11
1819	2.24e-06	HEXIM1	-0.353833	0.254	0.261	8.11e-02	11
1820	2.37e-06	HBB	-2.33763	0.383	0.346	8.56e-02	11
1821	2.60e-06	SSU72	-0.261944	0.406	0.384	9.43e-02	11
1822	2.64e-06	C1QC	-0.789873	0.104	0.075	9.55e-02	11
1823	2.96e-06	ANXA11	-0.283863	0.478	0.443	1.07e-01	11
1824	3.85e-06	CLEC14A	-0.268262	0.087	0.107	1.39e-01	11
1825	4.27e-06	SLC25A37	-0.690329	0.374	0.355	1.55e-01	11
1826	4.91e-06	PHF20L1	-0.334235	0.331	0.324	1.78e-01	11
1827	5.23e-06	YPEL3	-0.432821	0.512	0.459	1.89e-01	11
1828	7.80e-06	UBE2D1	-0.270431	0.176	0.191	2.82e-01	11
1829	7.82e-06	RNF10	-0.281312	0.271	0.273	2.83e-01	11
1830	8.40e-06	RNF130	-0.337279	0.438	0.394	3.04e-01	11
1831	1.01e-05	STOM	-0.418961	0.491	0.438	3.67e-01	11
1832	1.58e-05	FTL	-0.26864	0.948	0.905	5.70e-01	11
1833	2.72e-05	MME	-0.334832	0.134	0.104	9.83e-01	11
1834	4.26e-05	TBL1X	-0.296613	0.143	0.158	1.00e+00	11
1835	5.69e-05	GLUL	-0.271002	0.517	0.414	1.00e+00	11
1836	5.82e-05	MFSD14B	-0.26517	0.239	0.242	1.00e+00	11
1837	6.24e-05	GLIPR1	-0.364441	0.329	0.313	1.00e+00	11
1838	6.39e-05	CCL2	-0.277559	0.113	0.091	1.00e+00	11
1839	1.09e-04	RPL3	-0.288092	0.888	0.734	1.00e+00	11
1840	1.19e-04	ACAP2	-0.29609	0.347	0.334	1.00e+00	11
1841	1.30e-04	ZMAT2	-0.287153	0.335	0.321	1.00e+00	11
1842	1.39e-04	MOSPD2	-0.26473	0.156	0.168	1.00e+00	11
1843	1.43e-04	NFKBIA	-0.429115	0.636	0.498	1.00e+00	11
1844	1.63e-04	ARID4A	-0.306901	0.226	0.232	1.00e+00	11
1845	1.70e-04	EIF3A	-0.261148	0.483	0.435	1.00e+00	11
1846	1.74e-04	CYLD	-0.278835	0.196	0.205	1.00e+00	11
1847	1.84e-04	CHD2	-0.316644	0.31	0.304	1.00e+00	11
1848	2.35e-04	NINJ1	-0.297526	0.166	0.176	1.00e+00	11
1849	2.41e-04	HIST1H2AC	-0.413731	0.139	0.15	1.00e+00	11
1850	2.63e-04	SMC4	-0.331009	0.184	0.193	1.00e+00	11
1851	2.65e-04	ADIPOR1	-0.285534	0.266	0.264	1.00e+00	11
1852	2.86e-04	CAB39	-0.315936	0.284	0.275	1.00e+00	11
1853	3.55e-04	ACTA2	-0.747823	0.149	0.121	1.00e+00	11
1854	4.21e-04	HSPE1	-0.289498	0.459	0.42	1.00e+00	11
1855	4.39e-04	HIF1A	-0.253124	0.429	0.399	1.00e+00	11
1856	1.16e-03	WDR26	-0.289032	0.284	0.275	1.00e+00	11
1857	1.88e-03	MFSD1	-0.325414	0.328	0.303	1.00e+00	11
1858	2.07e-03	UHMK1	-0.257863	0.249	0.247	1.00e+00	11
1859	2.72e-03	ELOVL5	-0.262164	0.274	0.266	1.00e+00	11
1860	2.90e-03	RXRA	-0.254949	0.321	0.306	1.00e+00	11
1861	3.39e-03	SUN2	-0.294593	0.357	0.33	1.00e+00	11
1862	3.58e-03	NME2	-0.265489	0.414	0.371	1.00e+00	11
1863	3.61e-03	AKIRIN2	-0.275252	0.204	0.204	1.00e+00	11
1864	3.96e-03	ELANE	-1.56977	0.122	0.128	1.00e+00	11
1865	4.08e-03	TRA2B	-0.275662	0.443	0.399	1.00e+00	11
1866	4.34e-03	RTF2	-0.271289	0.338	0.317	1.00e+00	11
1867	8.06e-03	PHF12	-0.262534	0.183	0.186	1.00e+00	11
1868	8.27e-03	ADGRE5	-0.34972	0.21	0.206	1.00e+00	11
1869	8.71e-03	RNASE1	-0.992775	0.218	0.205	1.00e+00	11
1870	9.08e-03	CEMIP2	-0.265837	0.201	0.199	1.00e+00	11
1871	0.00e+00	COL3A1	-3.54246	0.075	0.393	0.00e+00	6
1872	0.00e+00	COL1A1	-3.17713	0.137	0.463	0.00e+00	6
1873	0.00e+00	COL1A2	-2.85753	0.129	0.429	0.00e+00	6
1874	0.00e+00	SPARC	-2.63374	0.157	0.42	0.00e+00	6
1875	0.00e+00	COL6A1	-2.13551	0.026	0.318	0.00e+00	6
1876	0.00e+00	MGP	-2.09865	0.042	0.325	0.00e+00	6
1877	0.00e+00	FN1	-2.0391	0.108	0.347	0.00e+00	6
1878	0.00e+00	SPARCL1	-1.84185	0.036	0.284	0.00e+00	6
1879	0.00e+00	COL15A1	-1.65451	0.014	0.239	0.00e+00	6
1880	0.00e+00	IL1B	1.58971	0.333	0.062	0.00e+00	6
1881	0.00e+00	COL4A2	-1.56103	0.014	0.269	0.00e+00	6
1882	0.00e+00	COL6A2	-1.55905	0.026	0.293	0.00e+00	6
1883	0.00e+00	VCAN	1.55665	0.845	0.257	0.00e+00	6
1884	0.00e+00	CAV1	-1.5108	0.019	0.296	0.00e+00	6
1885	0.00e+00	TIMP3	-1.47998	0.034	0.285	0.00e+00	6
1886	0.00e+00	IFI30	1.46745	0.874	0.206	0.00e+00	6
1887	0.00e+00	IGFBP4	-1.44467	0.047	0.312	0.00e+00	6
1888	0.00e+00	CAVIN1	-1.43723	0.022	0.318	0.00e+00	6
1889	0.00e+00	LYZ	1.42493	0.988	0.58	0.00e+00	6
1890	0.00e+00	GSN	-1.41981	0.425	0.576	0.00e+00	6
1891	0.00e+00	BAG3	1.36798	0.408	0.15	0.00e+00	6
1892	0.00e+00	SAMHD1	1.35581	0.903	0.325	0.00e+00	6
1893	0.00e+00	HSPA6	1.32674	0.518	0.167	0.00e+00	6
1894	0.00e+00	AQP1	-1.32454	0.013	0.236	0.00e+00	6
1895	0.00e+00	EREG	1.31928	0.233	0.036	0.00e+00	6
1896	0.00e+00	CALD1	-1.27614	0.012	0.264	0.00e+00	6
1897	0.00e+00	CD59	-1.2399	0.106	0.42	0.00e+00	6
1898	0.00e+00	HMOX1	1.23711	0.498	0.099	0.00e+00	6
1899	0.00e+00	PLIN2	1.23398	0.54	0.185	0.00e+00	6
1900	0.00e+00	FCN1	1.23239	0.891	0.347	0.00e+00	6
1901	0.00e+00	FSTL1	-1.19924	0.023	0.257	0.00e+00	6
1902	0.00e+00	MS4A6A	1.15838	0.818	0.167	0.00e+00	6
1903	0.00e+00	MPEG1	1.15503	0.769	0.111	0.00e+00	6
1904	0.00e+00	CRIP2	-1.13026	0.015	0.277	0.00e+00	6
1905	0.00e+00	LMNA	-1.12935	0.075	0.355	0.00e+00	6
1906	0.00e+00	AIF1	1.12133	0.896	0.255	0.00e+00	6
1907	0.00e+00	CTSS	1.05968	0.953	0.503	0.00e+00	6
1908	0.00e+00	ADA2	1.05051	0.766	0.145	0.00e+00	6
1909	0.00e+00	PRSS23	-1.02394	0.011	0.236	0.00e+00	6
1910	0.00e+00	ETS1	-1.02203	0.064	0.314	0.00e+00	6
1911	0.00e+00	ITGB2	1.01532	0.923	0.424	0.00e+00	6
1912	0.00e+00	CXCL8	1.01421	0.412	0.149	0.00e+00	6
1913	0.00e+00	HSPG2	-1.00511	0.014	0.246	0.00e+00	6
1914	0.00e+00	CD36	1.00224	0.753	0.144	0.00e+00	6
1915	0.00e+00	CD74	0.974677	0.955	0.576	0.00e+00	6
1916	0.00e+00	IER5	0.963069	0.617	0.226	0.00e+00	6
1917	0.00e+00	HSPH1	0.958514	0.692	0.406	0.00e+00	6
1918	0.00e+00	NNMT	-0.950352	0.013	0.233	0.00e+00	6
1919	0.00e+00	CD52	0.941757	0.726	0.184	0.00e+00	6
1920	0.00e+00	AP1S2	0.916998	0.831	0.324	0.00e+00	6
1921	0.00e+00	HSPD1	0.913745	0.688	0.429	0.00e+00	6
1922	0.00e+00	SYNE2	-0.912397	0.044	0.279	0.00e+00	6
1923	0.00e+00	NLRP3	0.883533	0.358	0.052	0.00e+00	6
1924	0.00e+00	CPVL	0.876548	0.624	0.133	0.00e+00	6
1925	0.00e+00	CNN3	-0.866851	0.013	0.26	0.00e+00	6
1926	0.00e+00	PSAP	0.864523	0.972	0.806	0.00e+00	6
1927	0.00e+00	HLA-DRA	0.85744	0.891	0.359	0.00e+00	6
1928	0.00e+00	SERPINB2	0.847969	0.268	0.015	0.00e+00	6
1929	0.00e+00	POU2F2	0.833728	0.551	0.098	0.00e+00	6
1930	0.00e+00	COTL1	0.830025	0.904	0.458	0.00e+00	6
1931	0.00e+00	APLP2	0.829728	0.892	0.496	0.00e+00	6
1932	0.00e+00	KCTD12	0.802425	0.757	0.274	0.00e+00	6
1933	0.00e+00	GLIPR1	0.792592	0.803	0.285	0.00e+00	6
1934	0.00e+00	LGALS9	0.777209	0.662	0.16	0.00e+00	6
1935	0.00e+00	CD86	0.768667	0.543	0.074	0.00e+00	6
1936	0.00e+00	CD68	0.761629	0.7	0.174	0.00e+00	6
1937	0.00e+00	CTSH	0.761431	0.738	0.215	0.00e+00	6
1938	0.00e+00	CD14	0.760766	0.612	0.131	0.00e+00	6
1939	0.00e+00	LY86	0.760134	0.562	0.071	0.00e+00	6
1940	0.00e+00	SLC7A7	0.75963	0.512	0.063	0.00e+00	6
1941	0.00e+00	PABPC1	0.754401	0.981	0.86	0.00e+00	6
1942	0.00e+00	ZNF385A	0.747202	0.579	0.138	0.00e+00	6
1943	0.00e+00	SERPINA1	0.743051	0.796	0.274	0.00e+00	6
1944	0.00e+00	FCER1G	0.736776	0.936	0.46	0.00e+00	6
1945	0.00e+00	CD83	0.732585	0.314	0.068	0.00e+00	6
1946	0.00e+00	CFD	-0.716148	0.366	0.146	0.00e+00	6
1947	0.00e+00	CD302	0.713756	0.722	0.249	0.00e+00	6
1948	0.00e+00	CCL3	0.708272	0.22	0.057	0.00e+00	6
1949	0.00e+00	FGL2	0.704872	0.673	0.201	0.00e+00	6
1950	0.00e+00	PMP22	-0.702196	0.029	0.258	0.00e+00	6
1951	0.00e+00	IGSF6	0.701949	0.726	0.197	0.00e+00	6
1952	0.00e+00	KLF4	0.699664	0.557	0.223	0.00e+00	6
1953	0.00e+00	UBC	0.695204	0.904	0.737	0.00e+00	6
1954	0.00e+00	ZFAND2A	0.694521	0.419	0.158	0.00e+00	6
1955	0.00e+00	H2AFY	0.692641	0.881	0.478	0.00e+00	6
1956	0.00e+00	HSP90AA1	0.683212	0.975	0.895	0.00e+00	6
1957	0.00e+00	CSTA	0.682664	0.776	0.261	0.00e+00	6
1958	0.00e+00	MALAT1	-0.682629	0.984	0.984	0.00e+00	6
1959	0.00e+00	HLA-DRB1	0.681795	0.849	0.385	0.00e+00	6
1960	0.00e+00	HLA-DPB1	0.681509	0.557	0.277	0.00e+00	6
1961	0.00e+00	CYP1B1	0.678955	0.403	0.127	0.00e+00	6
1962	0.00e+00	GRN	0.672135	0.909	0.591	0.00e+00	6
1963	0.00e+00	CYBB	0.671671	0.897	0.378	0.00e+00	6
1964	0.00e+00	CASP1	0.670719	0.633	0.149	0.00e+00	6
1965	0.00e+00	SHTN1	0.670522	0.441	0.063	0.00e+00	6
1966	0.00e+00	HSPA1A	0.66961	0.956	0.785	0.00e+00	6
1967	0.00e+00	MARCH1	0.668761	0.475	0.06	0.00e+00	6
1968	0.00e+00	IRF8	0.667901	0.464	0.079	0.00e+00	6
1969	0.00e+00	C1orf162	0.663932	0.766	0.259	0.00e+00	6
1970	0.00e+00	PLBD1	0.661609	0.738	0.312	0.00e+00	6
1971	0.00e+00	TNFSF13	0.655023	0.568	0.117	0.00e+00	6
1972	0.00e+00	NRGN	0.653982	0.477	0.085	0.00e+00	6
1973	0.00e+00	CCDC88A	0.647039	0.68	0.273	0.00e+00	6
1974	0.00e+00	CCL3L1	0.644728	0.219	0.05	0.00e+00	6
1975	0.00e+00	NAIP	0.634814	0.537	0.103	0.00e+00	6
1976	0.00e+00	ZEB2	0.632576	0.7	0.29	0.00e+00	6
1977	0.00e+00	ARPC1B	0.632321	0.893	0.585	0.00e+00	6
1978	0.00e+00	CD33	0.62852	0.487	0.065	0.00e+00	6
1979	0.00e+00	HLA-DPA1	0.627063	0.646	0.288	0.00e+00	6
1980	0.00e+00	RNASE6	0.622599	0.513	0.096	0.00e+00	6
1981	0.00e+00	ZFAND5	0.622457	0.723	0.433	0.00e+00	6
1982	0.00e+00	TNFAIP2	0.620002	0.684	0.232	0.00e+00	6
1983	0.00e+00	EIF4A1	0.618974	0.824	0.469	0.00e+00	6
1984	0.00e+00	TPP1	0.618653	0.841	0.428	0.00e+00	6
1985	0.00e+00	HBEGF	0.610697	0.345	0.09	0.00e+00	6
1986	0.00e+00	TYROBP	0.607882	0.947	0.522	0.00e+00	6
1987	0.00e+00	TNFSF13B	0.605855	0.598	0.146	0.00e+00	6
1988	0.00e+00	CD4	0.601868	0.531	0.156	0.00e+00	6
1989	0.00e+00	PLEK	0.599895	0.87	0.372	0.00e+00	6
1990	0.00e+00	HCK	0.592082	0.712	0.207	0.00e+00	6
1991	0.00e+00	PPT1	0.589007	0.688	0.249	0.00e+00	6
1992	0.00e+00	FGD2	0.588897	0.404	0.048	0.00e+00	6
1993	0.00e+00	HLA-DMB	0.587664	0.49	0.121	0.00e+00	6
1994	0.00e+00	PLAUR	0.582183	0.646	0.337	0.00e+00	6
1995	0.00e+00	DNAJB1	0.581566	0.806	0.564	0.00e+00	6
1996	0.00e+00	FTL	0.580329	0.986	0.902	0.00e+00	6
1997	0.00e+00	EVI2A	0.57938	0.644	0.195	0.00e+00	6
1998	0.00e+00	TMEM176B	0.573508	0.358	0.109	0.00e+00	6
1999	0.00e+00	SH3BGRL3	0.572628	0.976	0.837	0.00e+00	6
[truncated: 42,648 more rows]

## Sheet: Table S2 IAS score
ACTB
ACTG1
AKAP12
ERDR1
FKBP5
FTH1
MT1A
MT2A
S100A6
SERPINE1
ACTN1
ADAM12
ANXA3
ERRFI1
F3
GM14005
KRT7
LMO7
NCL
NPM1
PI15
S100A11
SEMA7A
SLC39A14
THBS1
TNC
ZBTB16
ACTN4
AHNAK
ANXA2
CALM1
CD63
CD93
CLIC4
CLIP4
COL4A1
COL4A2
DDX3X
EEF1A1
EIF3A
EIF4G1
FKBP1A
FMNL2
FTL
GM26917
GPRC5A
GPX3
H3F3B
ITGA5
ITGB1
ITGB6
KALRN
LAMC2
LYVE1
MSN
MYH9
PKD2
PKM
PLXNA2
PTMA
RGCC
SLC39A8
TACO1
TPM4
TPT1
VMP1
YAM1
ADAMTS9
ANO1
B4GALT1
BCL2L1
CALD1
CAMK1D
CD9
CLDN5
CMSS1
CTSH
DSTN
ELN
GCLC
GSR
HBB
HNRNPF
HNRNPU
IL4R
KRT8
LARS2
LPL
MGP
MT-ATP6
MT-ND1
NPC2
PABPC1
PAPPA
PCSK5
PDGFRA
PPIA
PPP1R2
RTN4
SERBP1
SERINC3
WFDC2
CALM2
COL5A2
EIF1
EMP1
FBXL5
FLNB
FN1
GAS7
ICAM1
ISM1
ITGA3
LGALS3
LPHN3
LY6S
MLLT4
MYL6
OSMR
QKI
RRAS2
SPACA6
TEAD1
TIMP3
VCAN
YWHAZ
ZNF697
