# Supplementary material
Source: Research Square preprint supplement (doi:10.21203/rs.3.rs-9232122/v1)
Supplement: Supplementary file 3 [file ed2747df1fc7b3a5fd35443d.pdf]

**Uncropped/unedited images for all blots**

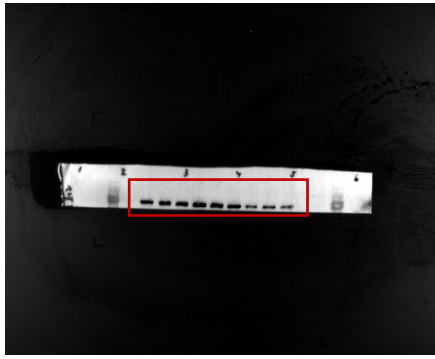

**3D-line1**

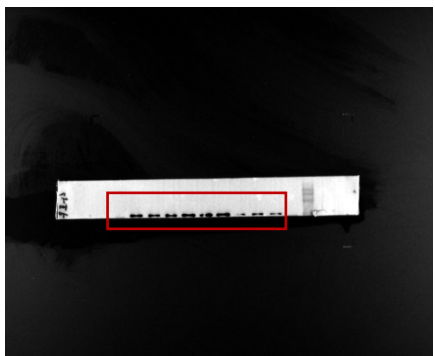

**3D-line2**

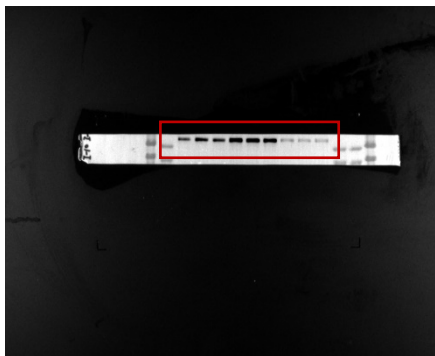

**3D-line3**

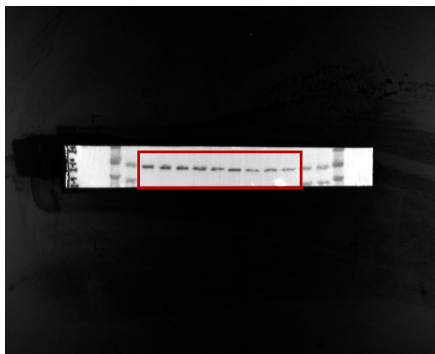

**3D-line4**

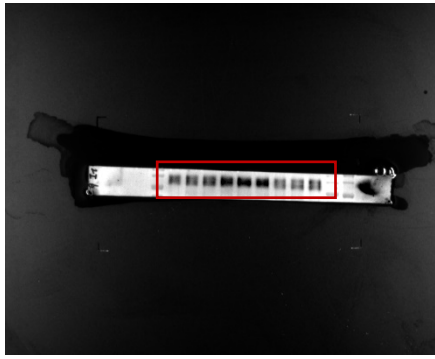

**3D-line5**

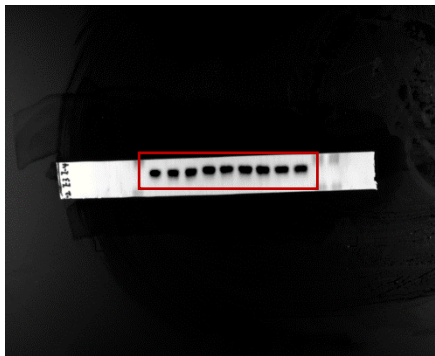

**3D-line6**

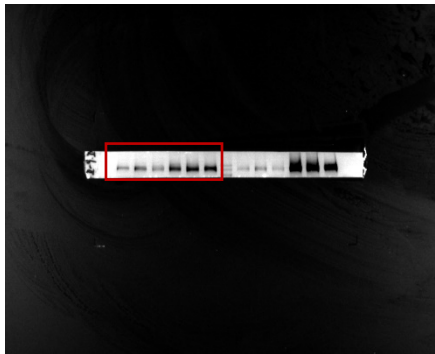

**3G-line1**

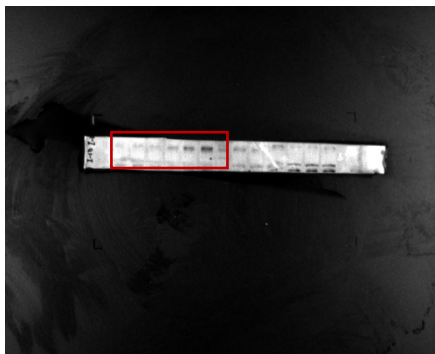

**3G-line2**

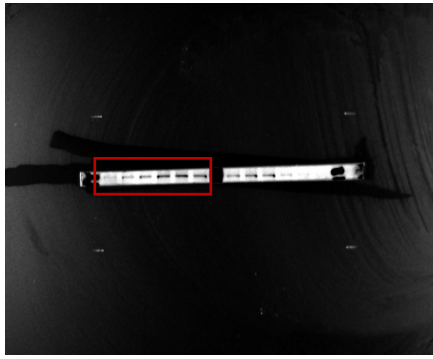

**3G-line3**

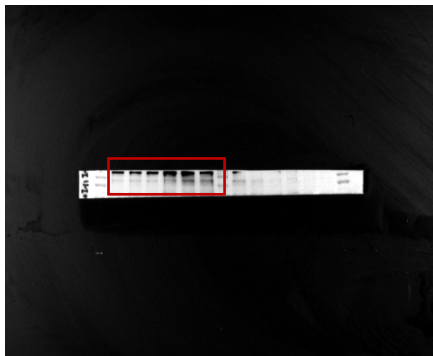

**3G-line4**

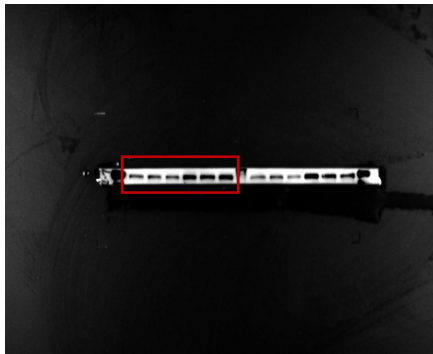

**3G-line5**

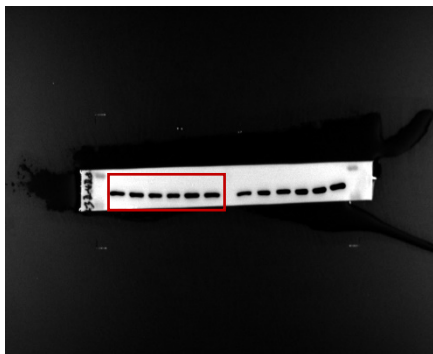

**3G-line6**

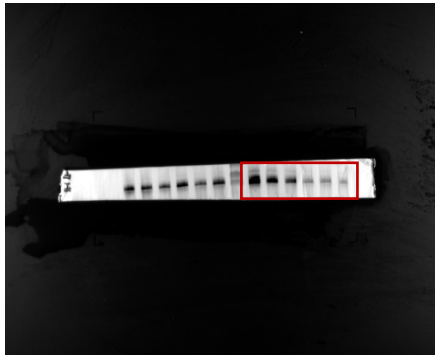

**3H-line1**

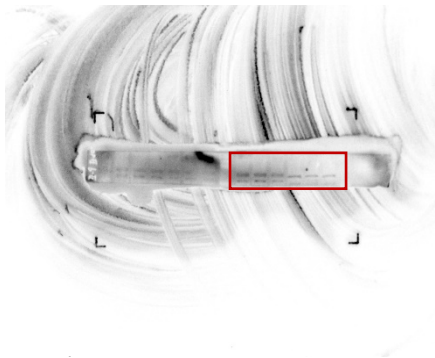

**3H-line2**

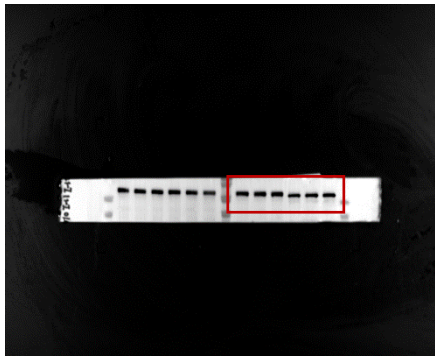

**3H-line3**

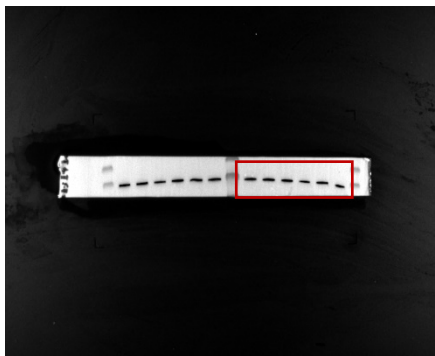

**3H-line4**

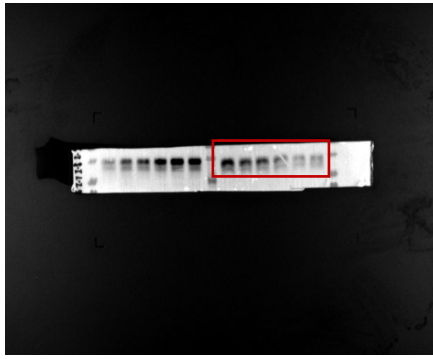

**3H-line5**

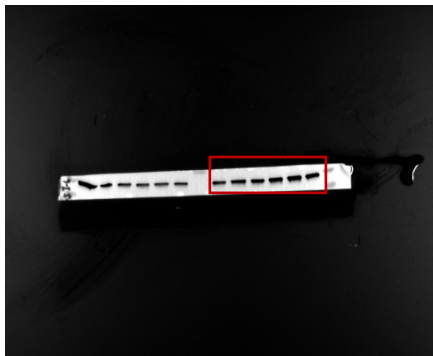

**3H-line6**

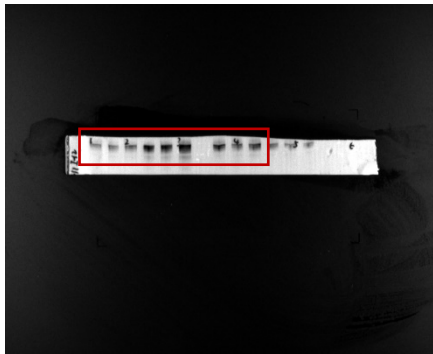

**3R-line1**

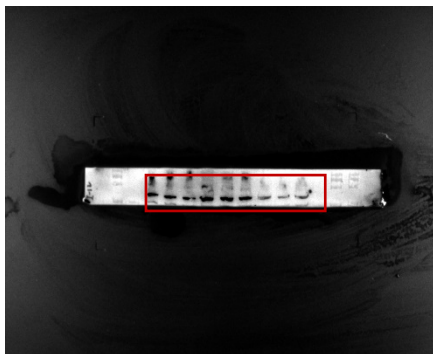

**3R-line2**

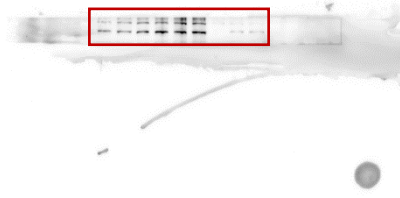

**3R-line3**

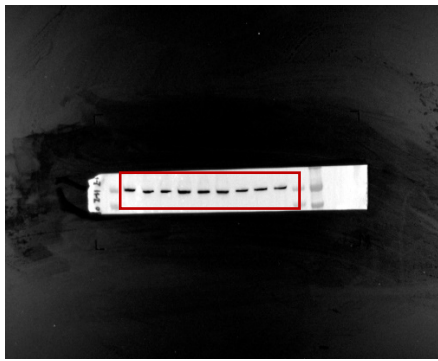

**3R-line4**

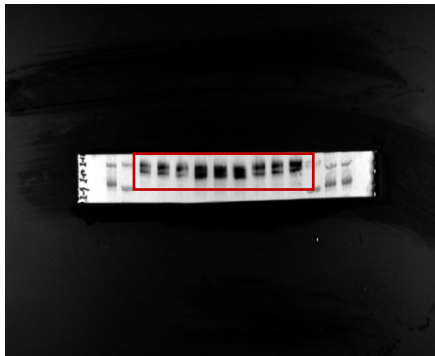

**3R-line5**

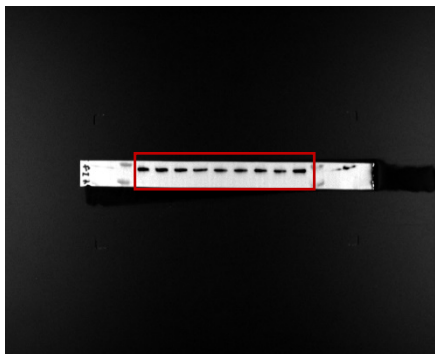

**3R-line6**

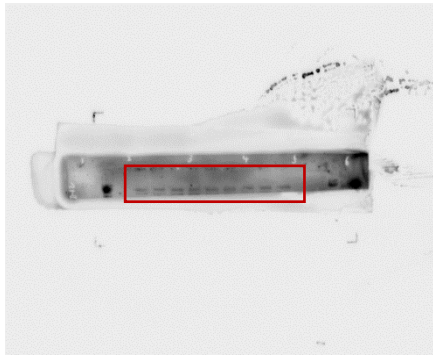

**3T-line1**

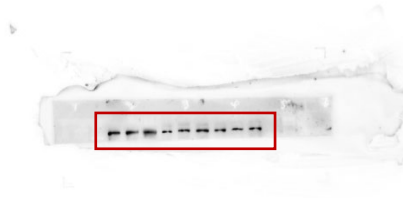

**3T-line2**

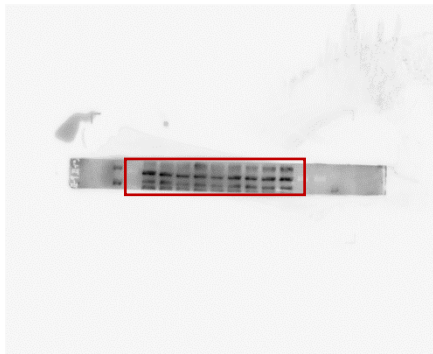

**3T-line3**

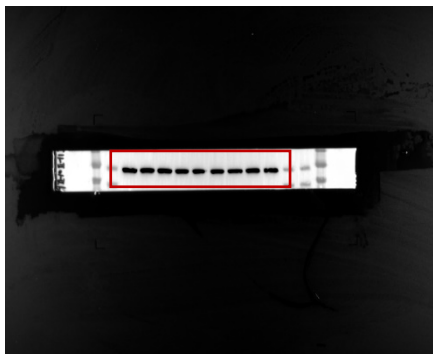

**3T-line4**

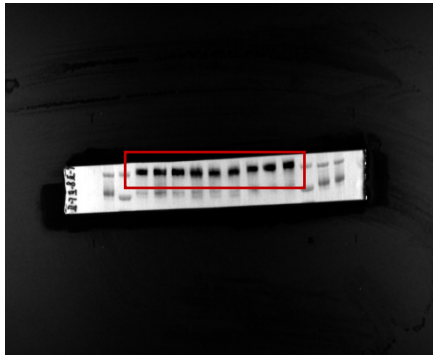

**3T-line5**

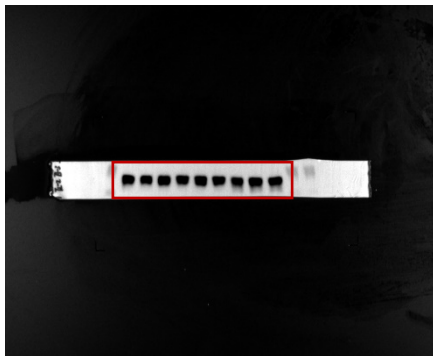

**3T-line6**

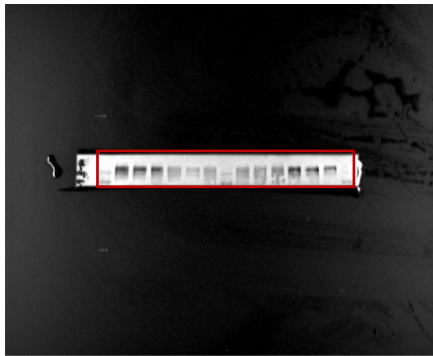

**S3B-line1**

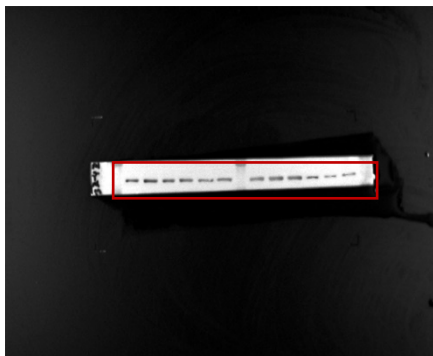

**S3B-line2**

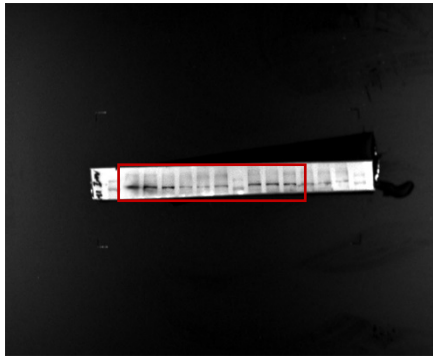

**S3E-line1**

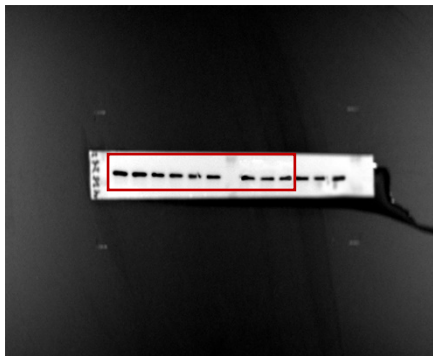

**S3E-line2**

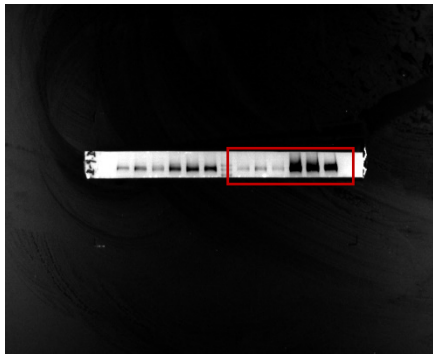

**4M-line1**

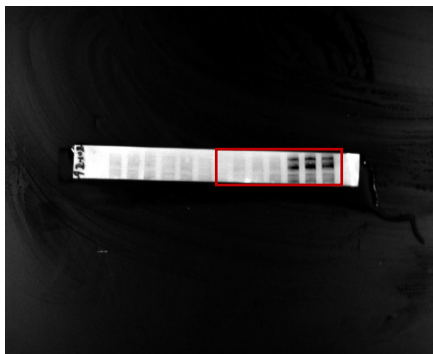

**4M-line2**

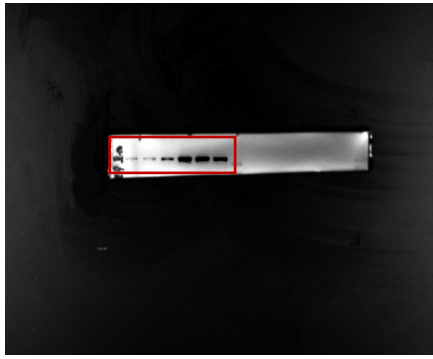

**4M-line3**

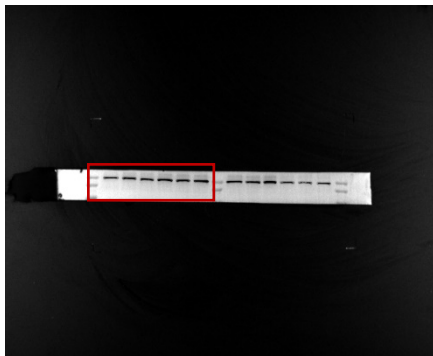

**4M-line4**

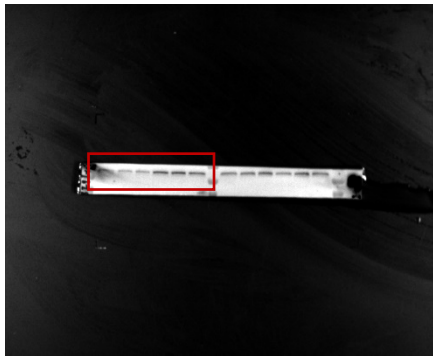

**4M-line5**

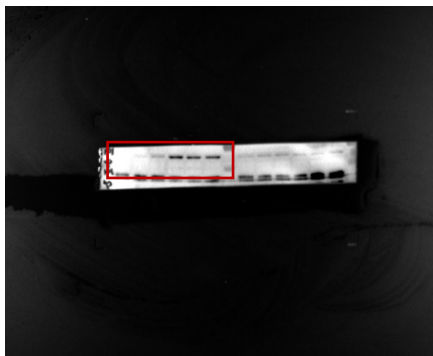

**4M-line6**

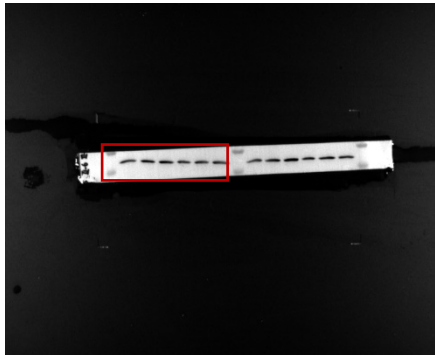

**4M-line7**

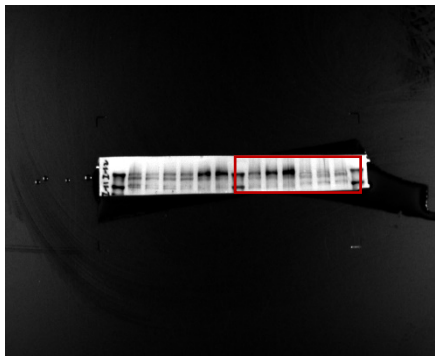

**S4I-line1**

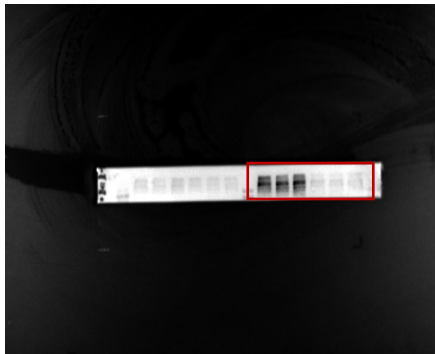

**S4I-line2**

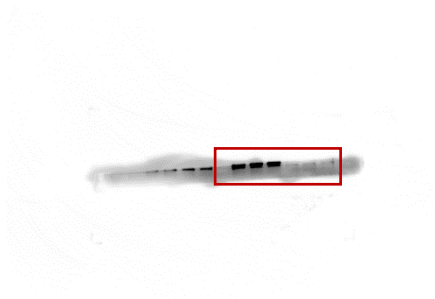

**S4I-line3**

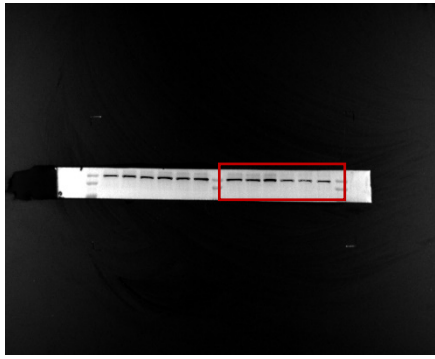

**S4I-line4**

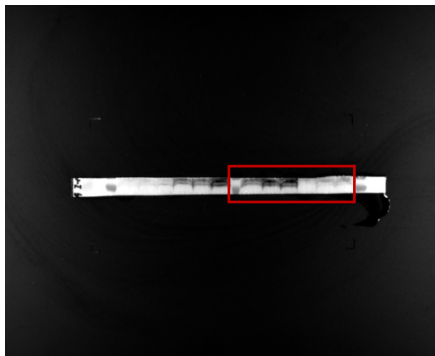

**S4I-line5**

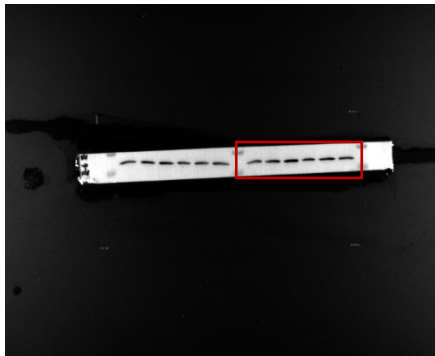

**S4I-line6**

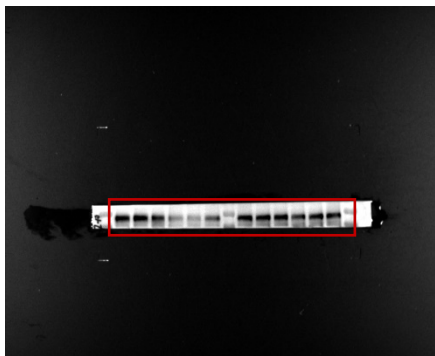

**7F-line1**

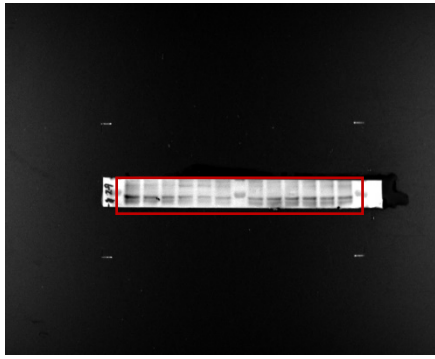

**7F-line2**

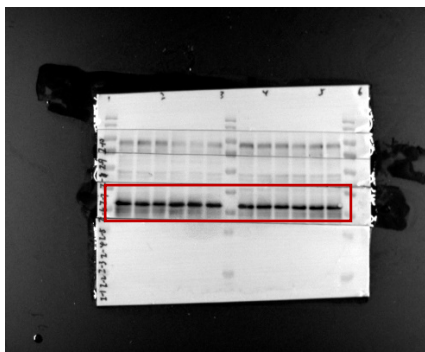

**7F-line3**
